# Supplementary material for: Artificial intelligence in the tourism business: a systematic review
Source: Front Artif Intell. 2025 Jul 25;8:1599391. doi: 10.3389/frai.2025.1599391 (PMC12331768; doi:10.3389/frai.2025.1599391)
Supplement: Supplementary file 2 [file Table_1.xlsx]

## Sheet: scopus
	Authors	Author full names	Author(s) ID	Title	Year	DOI	Link	Abstract	Author Keywords	Index Keywords	Document Type	Source
1	Ku E.C.S.	Ku, Edward C.S. (35177646000)	35177646000	Embracing the future of interactive marketing with contactless technology: evidence from tourism businesses	2024	10.1108/JRIM-04-2024-0183	https://www.scopus.com/inward/record.uri?eid=2-s2.0-85203342423&doi=10.1108%2fJRIM-04-2024-0183&partnerID=40&md5=7147cf34ac86c13881476fc5343d0f63	Purpose: This study explores how predictor variables (value congruence and customer–AI-assisted exchanges) lead tourism businesses to meet customer needs through contactless technology and enhance their willingness to pay more. Design/methodology/approach: The research model was designed from the perspective of consumer-brand relationships and acceptance of AI device use. This study collected and…	AI device use acceptance; Consumer-brand relationships; Contactless technology; Intimacy; Willingness to pay more		Article	Scopus
2	Zhang H.; Jiang L.	Zhang, Hongying (59185282700); Jiang, Lingyun (57218882285)	59185282700; 57218882285	APPLICATION OF ANN IN TOURISM BUSINESS DEVELOPMENT FOR DEMAND FORECASTING AND MANAGEMENT OF TOURISM HEADCOUNT	2024	10.12694/scpe.v25i4.2370	https://www.scopus.com/inward/record.uri?eid=2-s2.0-85196717352&doi=10.12694%2fscpe.v25i4.2370&partnerID=40&md5=bf756ba5281fd655c3466910d1b60775	With the rapid development of tourism, it is imperative to forecast tourism demand to maintain the long-term stable development of the tourism industry and make good planning for future tourism enterprises. The study uses the classical model of artificial neural network-BP neural network for tourism number demand prediction, given the problems of traditional BP neural networks, such as prematurit…	BP neural network; demand forecasting; immune particle swarm; tourism enterprises	Curve fitting; Iterative methods; Neural networks; Parameter estimation; Average errors; BP neural networks; Convergence speed; Demand forecasting; Demand prediction; Forecasting methods; Immune particle swarm; Prediction modelling; Tourism demand; Tourism enterprise; Forecasting	Article	Scopus
3	Meng L.	Meng, Lianchao (58796285300)	58796285300	The Convolutional Neural Network Text Classification Algorithm in the Information Management of Smart Tourism Based on Internet of Things	2024	10.1109/ACCESS.2024.3349386	https://www.scopus.com/inward/record.uri?eid=2-s2.0-85181574631&doi=10.1109%2fACCESS.2024.3349386&partnerID=40&md5=45d2f9c063c61eafedab5dd571efd7c0	The relentless progression of advanced technologies has driven the seamless integration of Internet of Things (IoT) services into the fundamental framework of contemporary tourism enterprises. In the quest for valuable insights from the vast reservoir of tourism data, this study employs a Convolutional Neural Network (CNN) as its primary instrument, culminating in the development of a Convolution…	accuracy; Convolutional neural network; F1 value; information management; smart tourism; text classification algorithm	Classification (of information); Convolution; Data mining; Information management; Internet of things; Neural networks; Accuracy; Classification algorithm; Convolutional neural network; F1 values; Sentiment analysis; Smart tourism; Text categorization; Text classification; Text classification algorithm; Tourism industry; Sentiment analysis	Article	Scopus
4	Buitrago-Esquinas E.M.; Yñiguez-Ovando R.; Puig-Cabrera M.; Santos M.C.; Santos J.A.C.	Buitrago-Esquinas, Eva María (55293654400); Yñiguez-Ovando, Rocío (58926948600); Puig-Cabrera, Miguel (57208303312); Santos, Margarida Custódio (57192278257); Santos, José António C. (57198436773)	55293654400; 58926948600; 57208303312; 57192278257; 57198436773	Artificial Intelligence and Sustainable Tourism Planning: A Hetero-Intelligence Methodology Proposal; [Inteligencia Artificial y Planificación Turística Sostenible: Una propuesta de Metodología Hetero-inteligente]	2024	10.18089/tms.2024SI04	https://www.scopus.com/inward/record.uri?eid=2-s2.0-85201087805&doi=10.18089%2ftms.2024SI04&partnerID=40&md5=1ca4ab71faa8200934e191e0ee8f2d5d	This study explores the growing significance of Large Language Models (LLMs) in tourism, for their current and potential applications. It aims to achieve two primary objectives: first, to develop a novel hetero-intelligence framework merging human and artificial intelligence (AI) to address contemporary sustainability challenges in tourism; second, to validate this framework by applying it to sus…	ChatGPT; Conversational generative AI; Hetero-intelligent performance testing; Human intelligence; Large language models; Sustainable tourism planning		Article	Scopus
5	Christensen J.; Hansen J.M.; Wilson P.	Christensen, Jeff (58814107700); Hansen, Jared M. (26638172100); Wilson, Paul (58106650500)	58814107700; 26638172100; 58106650500	Understanding the role and impact of Generative Artificial Intelligence (AI) hallucination within consumers’ tourism decision-making processes	2024	10.1080/13683500.2023.2300032	https://www.scopus.com/inward/record.uri?eid=2-s2.0-85182454787&doi=10.1080%2f13683500.2023.2300032&partnerID=40&md5=c54ff8b8bd48f46d082c3a1cd7fe89eb	ChatGPT, which launched only a year ago, is the fastest-growing website in the world today. When generative AI software such as ChatGPT generates ideas for people, they often generate false ideas. This occurrence has been called ‘AI Hallucination’. It can include generating false text output that is extremely believable to completely gibberish. This source of potential misinformation has signific…	challenges in technology usage in tourism; ChatGPT; Generative Artificial Intelligence (AI); hallucination misinformation; Technology Acceptance Model (TAM); tourism behaviour		Article	Scopus
6	Silva F.R.D.; Câmara S.F.; Pinto F.R.; Costa F.J.D.; Freitas L.M.D.; Oliveira Júnior J.G.C.D.; De Paula T.M.; Soares M.O.	Silva, Felipe Roberto da (57219561658); Câmara, Samuel Façanha (55312008600); Pinto, Francisco Roberto (36144475100); Costa, Francisco José da (58318370700); Freitas, Leonardo Martins de (58319028700); Oliveira Júnior, José Gilmar Cavalcante de (57217873648); De Paula, Thiago Matheus (57221335769); Soares, Marcelo Oliveira (36618032200)	57219561658; 55312008600; 36144475100; 58318370700; 58319028700; 57217873648; 57221335769; 36618032200	Machine learning application to assess deforestation and wildfire levels in protected areas with tourism management	2023	10.1016/j.jnc.2023.126435	https://www.scopus.com/inward/record.uri?eid=2-s2.0-85162190103&doi=10.1016%2fj.jnc.2023.126435&partnerID=40&md5=94ab89c330e3d4fe53ca6bc45adfd777	This study aims to identify the influence of management plans, management boards and tourism management on the relationship between performance indicators in the management of protected areas and degradation processes. To understand these relationships, 283 protected areas (PAs) in Brazil were analyzed. The first stage of the research used classification models based on machine learning algorithm…	Control policy; Effectiveness; Forest; Governance; Management board; Management plan	decision making; deforestation; environmental policy; governance approach; machine learning; protected area; tourism management; vulnerability; wildfire	Article	Scopus
7	Syed H.; Castanho R.A.; Santos E.; García P.J.C.; Franco M.	Syed, Hassan (57239313100); Castanho, Rui Alexandre (57192910839); Santos, Eleonora (57215002972); García, Pablo Juan Cárdenas (50861155500); Franco, Mara (57211789283)	57239313100; 57192910839; 57215002972; 50861155500; 57211789283	Business Plan Globetrot Plus Blockchain B2C Artificial Intelligence Solution for Tourism Industry	2023	10.1007/978-981-99-0337-5_43	https://www.scopus.com/inward/record.uri?eid=2-s2.0-85174442744&doi=10.1007%2f978-981-99-0337-5_43&partnerID=40&md5=509f84f1e6cbe75f83382c3b114e6fde	Travel is the ideal outcome for online diffusion. Unlike buying in most industries, the travel trade implicates the exchange, not physical inventory; however, it demands information. The tourist must select from many imaginable products, services, and fees that may differ with the minor adjustment of any parameters. Suppose, for example, a one-way airplane ticket. That ticket, for the same seat o…	Artificial intelligence; B2C; Blockchain; Tourism industry	Artificial intelligence; Applied field; Block-chain; Business plans; Creatives; Demand information; Direct and indirect methods; Literature reviews; Physical inventories; Product service; Tourism industry; Blockchain	Conference paper	Scopus
8	Ivanov S.H.; Webster C.; Stoilova E.; Slobodskoy D.	Ivanov, Stanislav Hristov (19337727400); Webster, Craig (26032723500); Stoilova, Elitza (57218438313); Slobodskoy, Daniel (57218437220)	19337727400; 26032723500; 57218438313; 57218437220	Biosecurity, crisis management, automation technologies and economic performance of travel, tourism and hospitality companies – A conceptual framework	2022	10.1177/1354816620946541	https://www.scopus.com/inward/record.uri?eid=2-s2.0-85089177268&doi=10.1177%2f1354816620946541&partnerID=40&md5=f5e61093ffc98c8a211d9825ac5d3f07	The COVID-19 pandemic of 2020 will have a significant influence on travel, tourism and hospitality (TTH) globally. With a massive reduction in tourism globally because of the health crisis, the industry will have to plan recovery and rebuilding of the industry with greater consideration of the biosecurity of customers. A critical element in the reorganisation of the industry will involve the incr…	artificial intelligence; biosecurity; COVID-19; crisis management; economic performance; pandemic; service automation; service robots	artificial intelligence; automation; conceptual framework; COVID-19; crisis management; disease spread; epidemic; hospitality industry; macroeconomics; microeconomics; robotics; tourism; travel behavior	Article	Scopus
9	Tzitziou G.; Dimara A.; Stefanopoulou A.; Papaioannou A.; Michailidis I.; Krinidis S.; Anagnostopoulos C.-N.; Kosmatopoulos E.; Ioannidis D.; Tzovaras D.	Tzitziou, Georgia (58222771900); Dimara, Asimina (57201366573); Stefanopoulou, Aliki (57776970600); Papaioannou, Alexios (57280507500); Michailidis, Iakovos (55654736200); Krinidis, Stelios (55968599400); Anagnostopoulos, Christos-Nikolaos (8966682200); Kosmatopoulos, Elias (7003350547); Ioannidis, Dimosthenis (19638392200); Tzovaras, Dimitrios (13105681700)	58222771900; 57201366573; 57776970600; 57280507500; 55654736200; 55968599400; 8966682200; 7003350547; 19638392200; 13105681700	Tourist Flow Projection in Response to Weather Variability for Sustainable Tourism and Management	2024	10.1007/978-3-031-63227-3_34	https://www.scopus.com/inward/record.uri?eid=2-s2.0-85199131206&doi=10.1007%2f978-3-031-63227-3_34&partnerID=40&md5=2133694dc55e049ff31d4fdc813b1326	To implement strategies to reduce environmental impact while optimizing infrastructure and enhancing the overall visitor experience, there is a need to analyze and comprehend the patterns of tourist flow. In addition, weather variability can significantly impact the number of tourists visiting a destination. Thus, when analyzing tourist flows, it is essential to take account of weather variations…	AI in Tourism; Resilient Management Strategies; Sustainable Tourism; Tourist Flow Analysis	Artificial intelligence; Learning systems; Sustainable development; Tourism; AI in tourism; Flow analysis; Machine learning techniques; Management strategies; Resilient management strategy; Sustainable management; Sustainable tourism; Tourist flow analyse; Visitor experiences; Weather variability; Environmental impact	Conference paper	Scopus
10	Hu Y.-C.	Hu, Yi-Chung (57138742500)	57138742500	Combination forecasting using multiple attribute decision making in tourism demand	2022	10.1108/TR-09-2021-0451	https://www.scopus.com/inward/record.uri?eid=2-s2.0-85125150157&doi=10.1108%2fTR-09-2021-0451&partnerID=40&md5=b0fde0cbf55084d13b18a8d437d3b677	Purpose: This study aims to address three important issues of combination forecasting in the tourism context: reducing the restrictions arising from requirements related to the statistical properties of the available data, assessing the weights of single models and considering nonlinear relationships among combinations of single-model forecasts. Design Methodology Approach: A three-stage multiple…	Artificial intelligence; Forecast combination; Grey prediction; Multiple attribute decision-making; Tourism demand		Article	Scopus
11	Zyma O.; Guryanova L.; Gavkalova N.; Chernova N.; Nekrasova O.	Zyma, Oleksandr (57202886856); Guryanova, Lidiya (36068855600); Gavkalova, Nataliia (56328233300); Chernova, Natalia (57212460303); Nekrasova, Olga (57860200500)	57202886856; 36068855600; 56328233300; 57212460303; 57860200500	THE APPLICATION OF MACHINE LEARNING METHODS IN DETERMINING ATTRACTIVE DEVELOPMENT DIRECTIONS FOR TOURISM BUSINESSES	2022	10.13165/IE-22-16-1-09	https://www.scopus.com/inward/record.uri?eid=2-s2.0-85136725886&doi=10.13165%2fIE-22-16-1-09&partnerID=40&md5=48981f106d02b60bffab7428a2273f6a	This paper proposes a methodical approach to the selection of attractive development directions for tourism businesses. The approach is based on the following machine learning methods: "center of gravity" method; taxonomic indicator of the level of development; hierarchical agglomerative and iterative methods of cluster analysis; methods for analyzing panel data; and Kohonen neural networks. The …	attractiveness assessment; development; machine learning; tourism business; tourism product		Article	Scopus
12	Zhang Q.; Li Y.	Zhang, Qingying (59507362900); Li, Yiling (59506730000)	59507362900; 59506730000	Innovative design of digital neural network-based biodata integration technology in cultural tourism management: Insights from cellular molecular biomechanics perspective	2025	10.62617/mcb981	https://www.scopus.com/inward/record.uri?eid=2-s2.0-85214496024&doi=10.62617%2fmcb981&partnerID=40&md5=9d208ea8c744fde2f2df055ee83c29a9	Based on the related feature selection algorithm, this paper builds the basic framework of the multi-strategy method of Fastest Virtual Reality (FVR) feature selection algorithm, and obtains the final collection of biometric data after feature dimensionality reduction and removal of redundant feature values.In the context of cellular molecular biomechanics, the retina sampling network's extractio…	biometric data; cellular molecular biomechanics; FVR feature selection algorithm; Gabor filtering; RBF network structure model	Blood vessels; Cellular neural networks; Data fusion; Feature Selection; Fourier transforms; Image retrieval; Image segmentation; Information management; Network security; Neurons; Principal component analysis; Basis function networks; Biometric data; Cellular molecular biomechanic; Cellulars; Fast virtual reality feature selection algorithm; Feature selection algorithm; Gabor filtering; Network …	Article	Scopus
13	Feng X.; Qi H.; Guo L.	Feng, Xiumei (59391225100); Qi, Haixia (56486761500); Guo, Lei (59391055400)	59391225100; 56486761500; 59391055400	Analysis of Rural Tourism Route Planning System Based on Artificial Intelligence Algorithm	2024	10.1109/AIARS63200.2024.00132	https://www.scopus.com/inward/record.uri?eid=2-s2.0-85207952115&doi=10.1109%2fAIARS63200.2024.00132&partnerID=40&md5=2360ee292dedd0ab7bca8c7d962c666d	Under the background of the era of tourism informatization and Artificial Intelligence (AI), higher requirements are adopted for the route planning of scenic spots. In this paper, in the rural tourism route planning system based on artificial intelligence algorithm, the rural tourism route planning system based on artificial intelligence algorithm is registered, and the information of scenic spot…	artificial intelligence algorithms; percapita tourism consumption; route planning systems; Rural tourism; tourist attributes	Artificial intelligence algorithms; Informatization; Per capita; Percapitum tourism consumption; Route planning system; Rural tourisms; Scenic spot; Tourism consumption; Tourism planning; Tourist attribute	Conference paper	Scopus
14	Yin L.; Yang K.	Yin, Lijie (56995519800); Yang, Kun (58112435700)	56995519800; 58112435700	Machine Learning based Big Data Analysis for Tourism Management Professional Ability Demand	2022	10.1109/WAIE57417.2022.00017	https://www.scopus.com/inward/record.uri?eid=2-s2.0-85148658343&doi=10.1109%2fWAIE57417.2022.00017&partnerID=40&md5=8cc94b923c3a706bc3cd0567cb0e6cdb	In recent years, the development of the tourism industry presents a new trend, which brings new challenges to students' training in tourism management major. In this context, analyzing the characteristics and structure of tourism management professionals vocational ability demand is the primary part of tourism management professionals' training. In this paper, the crawler software is used to obta…	big data; professional ability demand; Professional training; tourism management specialty	Cluster analysis; Information management; Principal component analysis; Professional aspects; Students; Demand structures; Machine-learning; Management professionals; Professional abilities; Professional ability demand; Professional training; Student training; Tourism industry; Tourism management; Tourism management specialty; Big data	Conference paper	Scopus
15	Xiao X.; Li P.; Seekamp E.	Xiao, Xiao (55553649500); Li, Peizhe (57224770886); Seekamp, Erin (6507285366)	55553649500; 57224770886; 6507285366	Sustainable Adaptation Planning for Cultural Heritage in Coastal Tourism Destinations Under Climate Change: A Mixed-Paradigm of Preservation and Conservation Optimization	2024	10.1177/00472875221143479	https://www.scopus.com/inward/record.uri?eid=2-s2.0-85146362485&doi=10.1177%2f00472875221143479&partnerID=40&md5=9c3a7200f1035a343b24097c47c34f23	Fragmented guidance and unbalanced climate adaptation efforts for tangible and intangible cultural heritage are challenging the long-term sustainability of coastal tourism destinations. Conceptualizing and quantifying adaptation paradigms that optimize cultural heritage preservation from multi-faceted perspectives under fiscal constraints is highly prioritized by coastal tourism destinations. Inf…	Climate adaptation planning; coastal tourism destinations; cultural heritage; national parks; preservation optimization; Sustainable Development Goals (SDGs)	adaptive management; climate change; conservation management; cultural heritage; national park; optimization; sustainable development; Sustainable Development Goal; tourist destination	Article	Scopus
16	Yu Z.; Wang S.	Yu, Zhenzhen (57463511000); Wang, Shan (58427763600)	57463511000; 58427763600	Smart Tourism Route Planning System Based on Machine Learning Algorithm	2022	10.1109/CAIT56099.2022.10072232	https://www.scopus.com/inward/record.uri?eid=2-s2.0-85151955062&doi=10.1109%2fCAIT56099.2022.10072232&partnerID=40&md5=4c0d884575f132ccda2959bf6006ce6d	With the development of economy and the improvement of life quality, people have a deeper pursuit. Therefore, tourism has developed into one of the pillar industries of China's economy. Tourism has gradually become an important part of people's life and entertainment, but people's tourism consumption behavior has undergone significant changes, and they have a higher standard for tourism quality, …	machine learning algorithm; route planning system; smart tourism; tourism industry	Economic and social effects; Learning algorithms; Machine learning; Tourism; Current situation; High standards; Life qualities; Machine learning algorithms; On-machines; Paper analysis; Route planning system; Smart tourism; Tourism consumption; Tourism industry; Response time (computer systems)	Conference paper	Scopus
17	Wang J.	Wang, Jun (57788115300)	57788115300	Deep LSTM Network for Word-of-Mouth Management of Rural Tourism	2022	10.1155/2022/2511825	https://www.scopus.com/inward/record.uri?eid=2-s2.0-85133565817&doi=10.1155%2f2022%2f2511825&partnerID=40&md5=cf0ead79a477db64df9cfca144bd0e5c	With the development of tourism, rural tourism as an industry with great development potential is gradually attracting urban consumers. Considering the differences between different types of rural tourism, I refine it at the visitor level to balance the differences in visitor groups of different types of rural tourism. I propose an improved LSTM framework for rural tourism theme feature extractio…		Feature extraction; Information management; Long short-term memory; Data preprocessing; Development potential; Experimental validations; Features extraction; Field surveys; Management strategies; Performance; Rural tourisms; Tourism management; Type classifications; Deep neural networks	Article	Scopus
18	Wang L.	Wang, Lulu (47761537500)	47761537500	Enhancing tourism management through big data: Design and implementation of an integrated information system	2024	10.1016/j.heliyon.2024.e38256	https://www.scopus.com/inward/record.uri?eid=2-s2.0-85206799190&doi=10.1016%2fj.heliyon.2024.e38256&partnerID=40&md5=237464cb94d676c4b9cd0faefcf08e26	Many sectors, particularly traveling, have been profoundly affected by the fast development of big data technologies. This article provides a detailed examination of the development and execution of a Tourism Management Information System (TMIS) that utilizes big data analytics to improve operational effectiveness, gain insights into tourist behavior, and encourage sustainable tourism practices. …	Big data technology; Decision making; Tourism industry; Tourism management information system		Article	Scopus
19	Dalkıran G.B.	Dalkıran, Gülüm Burcu (57343837900)	57343837900	Health Tourism Components and Intermediary Institutions as Supplier Businesses in the Context of Health 4.0	2023	10.1007/978-981-99-1818-8_12	https://www.scopus.com/inward/record.uri?eid=2-s2.0-85156087919&doi=10.1007%2f978-981-99-1818-8_12&partnerID=40&md5=e638d900d519106ac0a99f1073fc0eac	The desire to be healthy, which is among the reasons that lead people to tourism, has turned into a large sector in which many people and institutions operate. In this sector called health tourism, intermediary organizations that can act on behalf of service recipients by directing them and providing service logistics play an important role. The destinations that can be determined in the alternat…	Health 4.0; Health tourism; Intermediary institutions in health tourism; Medical tourism; Service providers in health tourism; Supplier businesses in health tourism; Technology 4.0		Book chapter	Scopus
20	Andrés Puerta Guardo F.; Susana Cantillo Orozco A.; Enrique Sanabria Ospino A.; Fajardo-Moreno W.S.; Ricardo López K.E.; Devoz Yance Z.; Camilo Ramírez García J.	Andrés Puerta Guardo, Fabio (59326375400); Susana Cantillo Orozco, Ana (59325309400); Enrique Sanabria Ospino, Alfredo (57212004785); Fajardo-Moreno, William Stive (57666745300); Ricardo López, Kevin E. (59325669100); Devoz Yance, Zoila (59325491800); Camilo Ramírez García, Juan (57216332462)	59326375400; 59325309400; 57212004785; 57666745300; 59325669100; 59325491800; 57216332462	Digital entrepreneurship and technological transformation within the reach of risk management in tourism	2024	10.18687/LACCEI2024.1.1.1431	https://www.scopus.com/inward/record.uri?eid=2-s2.0-85206507380&doi=10.18687%2fLACCEI2024.1.1.1431&partnerID=40&md5=03a2a3b42549d3c1c5864b33ca1207de	The dynamics of digital transformations and the impact of the activities developed by the tourism industry and the people who consume its goods and services, make it necessary to have tools that contribute to risk management in tourism. Therefore, this research is based on a theoretical approach to digital entrepreneurship and technological transformations that are available to the tourism sector…	Artificial Intelligence; Bibliometrics; Digital Entrepreneurship; Technological Transformation; Tourism Risk Management		Conference paper	Scopus
21	Huang M.; Pan J.; Yan C.	Huang, Meizhong (57561714800); Pan, Jiang (58920252800); Yan, Cheng (57280675300)	57561714800; 58920252800; 57280675300	Design and Planning of Tourism Path Based on Social Media Sharing Data Mining	2024	10.2478/amns-2024-0544	https://www.scopus.com/inward/record.uri?eid=2-s2.0-85186731703&doi=10.2478%2famns-2024-0544&partnerID=40&md5=3baa227598bf22ab3ff20cbf97922289	In recent years, along with the rapid development of artificial intelligence, big data and social media, informatization in the tourism industry also shows an explosive trend. This paper constructs a tourism path planning system based on data mining technology and the selection method of the optimal path. The GS algorithm is used to optimize the SVM algorithm to form the GS-SVM fusion algorithm, …	Data mining; GS; Path planning; SVM	Motion planning; Social networking (online); Tourism; Traffic congestion; Design and planning; GS; Informatization; Optimal paths; Passage time; Path-based; Planning systems; Social media; SVM; Tourism industry; Data mining	Article	Scopus
22	Srinivasan J.; Niranjanee M.; Nandhana C.; Azhagiri M.	Srinivasan, Jayanth (59250717100); Niranjanee, M. (59251017900); Nandhana, C. (57466893500); Azhagiri, M. (57191846865)	59250717100; 59251017900; 57466893500; 57191846865	A Text Classification in Tourism Reviews with the Hybrid Transformer-Attention Model in the Information Management of Smart Tourism	2025	10.1007/978-981-97-7371-8_37	https://www.scopus.com/inward/record.uri?eid=2-s2.0-85213026420&doi=10.1007%2f978-981-97-7371-8_37&partnerID=40&md5=ee68d8d6e4f3d5371e31cefc7502fa19	In the realm of smart tourism, understanding tourist feedback through sentiment analysis is pivotal for enhancing service quality and experience. This study introduces a novel Hybrid Transformer-Attention Model (HTAM), designed to advance sentiment classification accuracy, model interpretability, and linguistic adaptability in tourist reviews. By integrating the contextual insights of transformer…	Hybrid transformer-attention model (HTAM); Machine learning in hospitality; Sentiment analysis; Smart tourism	Information management; Attention model; Convolutional neural network; Hybrid transformer-attention model; Machine learning in hospitality; Machine-learning; Sentiment analysis; Service experience; Service Quality; Smart tourism; Text classification; Convolutional neural networks	Conference paper	Scopus
23	Luo Z.	Luo, Zhide (57987654800)	57987654800	Research on the Management of Ecological Agricultural Characteristic Tourism Development Based on Artificial Intelligence Technology	2024	10.2478/amns-2024-0306	https://www.scopus.com/inward/record.uri?eid=2-s2.0-85185391715&doi=10.2478%2famns-2024-0306&partnerID=40&md5=4cae92ae79d9e20dde7aae3529df91cd	Eco-agricultural characteristic tourism is one of the important contents of China's tourism research, and is also one of the important initiatives to solve the "three rural problems"and realize comprehensive well-off. This paper proposes a particle algorithm-optimized RBF neural network model based on a neural network, which greatly overcomes the defects of its busy convergence speed and complex …	Ecological agriculture; Particle swarm algorithm; RBF neural network; Tourism management	Ecology; Information management; Neural network models; Radial basis function networks; Tourism; A-particles; Artificial intelligence technologies; Ecological agricultures; Model-based OPC; Neural network model; Neural-networks; Particle swarm algorithm; RBF Neural Network; Tourism development; Tourism management; Human resource management	Article	Scopus
24	Kuo C.-H.	Kuo, Chen-Ho (58793273200)	58793273200	Enhancing Inbound Tourism through the Taiwan Outdoor Project and AI-Enabled Chatbot Management	2023		https://www.scopus.com/inward/record.uri?eid=2-s2.0-85181397592&partnerID=40&md5=a9d539f96762bfc6f918fb262ab3e592	In recent years, the global tourism industry has faced unprecedented challenges due to the COVID-19 pandemic. Taiwan, like many other countries, experienced a significant decrease in inbound tourism. However, an innovative project called Taiwan Outdoor emerged, aiming to leverage AI technology and its AI-enabled chatbot to support inbound tourism by providing enhanced services to foreign expatria…	AI-Enabled Chatbot management; Inbound tourism; Parkbus service; Taiwan Outdoor project	Learning algorithms; Natural language processing systems; Tourism; AI Technologies; AI-enabled chatbot management; Chatbots; Customer feedback; Inbound tourisms; Innovative projects; National parks; Parkbus service; Taiwan outdoor project; Tourism industry; Sales	Conference paper	Scopus
25	Zhou Z.; Li T.; Liu C.; Zhou Y.; Li P.; Wen S.	Zhou, Zhongyuan (58634865100); Li, Ting (Tina) (57210748564); Liu, Chang (59086980500); Zhou, Yang (57222714403); Li, Ping (57226810037); Wen, Si (57220488890)	58634865100; 57210748564; 59086980500; 57222714403; 57226810037; 57220488890	Why do social media users follow tourism-related posts? Roles of bloggers and posts in trip planning	2023	10.1108/IMDS-11-2022-0692	https://www.scopus.com/inward/record.uri?eid=2-s2.0-85173535982&doi=10.1108%2fIMDS-11-2022-0692&partnerID=40&md5=37d1e713508cfc0158c5a3f8f35af40b	Purpose: More people share their tourism experiences on social media today than in the past, and as a result, more people follow these posts in their trip planning. However, studies into tourists' intention to follow such posts are scarce. Therefore, this study investigates the antecedents influencing social media users' intentions to follow tourism-related posts (TRPs) when planning their trips.…	Online consumer behavior; Online marketing; Social media advertising; Social media marketing; Tourism marketing	Blogs; Least squares approximations; Neural networks; Social networking (online); Tourism; Advertizing; Bloggers; Online consumer behavior; Online marketing; Social media; Social media marketings; Social medium advertizing; Tourism marketings; Travel behaviour; Trip planning; Consumer behavior	Article	Scopus
26	Puri V.; Mondal S.; Das S.; Vrana V.G.	Puri, Vikram (57189093819); Mondal, Subhra (57198887149); Das, Subhankar (55605761930); Vrana, Vasiliki G. (14026091800)	57189093819; 57198887149; 55605761930; 14026091800	Blockchain Propels Tourism Industry—An Attempt to Explore Topics and Information in Smart Tourism Management through Text Mining and Machine Learning	2023	10.3390/informatics10010009	https://www.scopus.com/inward/record.uri?eid=2-s2.0-85148096498&doi=10.3390%2finformatics10010009&partnerID=40&md5=5fee4f435be45b0c167e34afad2cf094	Blockchain and immersive technology are the pioneers in bringing digitalization to tourism, and researchers worldwide are exploring many facets of these techniques. This paper analyzes the various aspects of blockchain technology and its potential use in tourism. We explore high-frequency keywords, perform network analysis of relevant publications to analyze patterns, and introduce machine learni…	artificial intelligence; bibliometrics; blockchain in tourism; machine learning; smart tourism; text analysis; topic modeling		Article	Scopus
27	Xu L.	Xu, Liping (59182504400)	59182504400	A MULTI-LEVEL DEEP NEURAL NETWORK-BASED TOURISM SUPPLY CHAIN RISK MANAGEMENT STUDY	2024	10.12694/scpe.v25i4.2894	https://www.scopus.com/inward/record.uri?eid=2-s2.0-85196628590&doi=10.12694%2fscpe.v25i4.2894&partnerID=40&md5=1635f2d73ce1a5ca199385c060cdc980	With the rapid advancement of the tourism, the capital demand of tourism enterprises has gradually risen, but the confusion of market management has increased the difficulty of risk assessment of tourism enterprises by financial institutions, which has led to difficulties in financing tourism enterprises and seriously hindered their development. On this basis, this research first analyses the ris…	Finance; Multilevel Deep Neural Networks; Risk Management; Tourism	Finance; Risk analysis; Risk assessment; Risk management; Supply chain management; Supply chains; Tourism; Financial aspects; Financial institution; Hidden layers; Multilevel deep neural network; Multilevels; Network-based; Risks assessments; Risks management; Supply-chain risks; Tourism supply chain; Deep neural networks	Article	Scopus
28	Song J.; Xu H.	Song, Jingqing (58242008600); Xu, Han (58243118800)	58242008600; 58243118800	Safety Risk Evaluation of Tourism Management System Based on PSO-BP Neural Network	2023	10.1155/2023/2968129	https://www.scopus.com/inward/record.uri?eid=2-s2.0-85158916231&doi=10.1155%2f2023%2f2968129&partnerID=40&md5=5dde122e2c6a7573432a901cab5d00a2	With the recovery of the tourism industry and the development of the field of artificial intelligence, the application of intelligent neural network technology to management systems for safety risk assessment is the choice of the times and an urgent real need for relevant practitioners. In this study, the BP neural network algorithm is used as a tool for safety evaluation of the tourism managemen…		Accident prevention; Long short-term memory; Multilayer neural networks; Particle swarm optimization (PSO); BP neural networks; Management systems; Network technologies; Neural networks algorithms; Neural-networks; Risk evaluation; Safety risk assessments; Safety risks; Tourism industry; Tourism management; Risk assessment	Article	Scopus
29	Zhong L.; Lin S.	Zhong, Ling (58248837800); Lin, Shibo (59247254100)	58248837800; 59247254100	Combine deep learning and LKH algorithm to solve multiconstraint tourism planning	2024	10.1117/12.3034942	https://www.scopus.com/inward/record.uri?eid=2-s2.0-85200439202&doi=10.1117%2f12.3034942&partnerID=40&md5=0398516e9b77a5b65721ca388ecd0ec9	Multi-constraint travel route planning is a challenging problem, which involves multiple constraints such as transportation, time, cost and traveler preference. In recent years, the development of deep learning technology has provided new possibilities to solve this problem. In this paper, a method combining deep learning and LKH algorithm is proposed to solve the multi-constraint tourism plannin…	Deep learning; multi-constraint; Travel routes	Deep learning; Learning algorithms; Learning systems; Transportation routes; Deep learning; Learning models; Learning technology; Multi-constraints; Multiple constraint; Time cost; Tourism planning; Transportation time; Travel route planning; Travel routes; Travel time	Conference paper	Scopus
30	Pradhan S.; Lama S.; Bunker D.	Pradhan, Sojen (8967551800); Lama, Sanjay (57210842330); Bunker, Deborah (15520858500)	8967551800; 57210842330; 15520858500	ICT Adoption for Tourism Disaster Management: A Systematic Review	2022		https://www.scopus.com/inward/record.uri?eid=2-s2.0-85170640598&partnerID=40&md5=693aa035a168b35d40b315a20623f947	The tourism sector is not new to disruptions from natural disasters or human induced crises and has been recalibrating the way they operate and sustain. The scale and impact of the COVID-19 pandemic has highly impacted global tourism and the economies that rely on tourism. It has brought phenomenal challenges to humankind and many tourism organisations are on the brink of collapse and this will h…	COVID-19; Disaster Management; ICT Adoption; Tourism	Disaster prevention; Disasters; Information management; Information systems; Information use; Tourism; Virtual reality; Cascading effects; Disaster management; ICT adoption; ICT-tools; Natural disasters; Potential adoption; Systematic literature review; Systematic Review; Tourism industry; Tourism sectors; COVID-19	Conference paper	Scopus
31	Zhang H.; Zhang Y.; Chen K.	Zhang, Hongshan (59199537900); Zhang, Yi (58223330100); Chen, Ke (59199787100)	59199537900; 58223330100; 59199787100	Optimization of CAD Application in Tourism Landscape Planning with Deep Learning	2025	10.14733/cadaps.2025.S1.223-236	https://www.scopus.com/inward/record.uri?eid=2-s2.0-85197351392&doi=10.14733%2fcadaps.2025.S1.223-236&partnerID=40&md5=f3e351ba4626aafe849ee898a28436e2	With the development of the economy and society, people's living standards continue to improve. Traditional tourism landscape and scenic area planning can not meet people's spirit and modern needs; the tourism industry, in order to develop in the long run, must adjust the tourism landscape planning and design from the perspective of tourists. This paper is based on a deep learning algorithm to op…	CAD Technology; Deep Learning; Planning and Design; Three-Dimensional Modeling; Tourist Landscape	3D modeling; Computer aided design; Deep learning; Image enhancement; Learning algorithms; Three dimensional computer graphics; CAD applications; CAD Technologies; Deep learning; Economy and society; Landscape planning; Landscape planning and designs; Optimisations; Planning and design; Three dimensional modelling; Tourist landscape; Efficiency	Article	Scopus
32	Thumrongvut P.; Sethanan K.; Pitakaso R.; Jamrus T.; Golinska-Dawson P.	Thumrongvut, Pawnrat (57763148000); Sethanan, Kanchana (55668955300); Pitakaso, Rapeepan (14831530600); Jamrus, Thitipong (56479205300); Golinska-Dawson, Paulina (23034141000)	57763148000; 55668955300; 14831530600; 56479205300; 23034141000	Application of Industry 3.5 approach for planning of more sustainable supply chain operations for tourism service providers	2023	10.1080/13675567.2022.2090529	https://www.scopus.com/inward/record.uri?eid=2-s2.0-85132768311&doi=10.1080%2f13675567.2022.2090529&partnerID=40&md5=8035a42cab55fe2a96ff6a7cac783091	This paper addresses a tourist trip design problem and a tour route planning problem to improve the competitiveness of community tourism. The problem was investigated with the objective to maximise the total number of tourists interested in visiting multiple points of interest and several specific activities to receive a satisfactory service by matching their preferences. The problem was formulat…	AI heuristics for optimisation; Industry 3.5; sustainable supply chain management; Tourism industry		Article	Scopus
33	Abraham S.T.; Thazhathethil B.V.	Abraham, Sharon Treesa (57424391200); Thazhathethil, Bindu Vazhakkatte (57219928760)	57424391200; 57219928760	Tourism disaster management through chatbots as an alternative tool of communication	2023	10.34624/rtd.v41i0.30195	https://www.scopus.com/inward/record.uri?eid=2-s2.0-85162738625&doi=10.34624%2frtd.v41i0.30195&partnerID=40&md5=5507c567ca43cfba47e6d641e8c79937	Information and Communication Technologies has revolutionized the hospitality and tourism sector. Artificial Intelligence (Al) and Machine Learning Technology (MLT) are widely popular and can be of assistance to reduce the impact of disasters by providing accurate, brief, and updated information. It also facilitates predicting and executing plans in managing crises to lessen losses. Chatbot can s…	Artificial intelligence chatbots; Disaster risk reduction and management; Information and Communication Technology; SWOC analysis; Tourism		Article	Scopus
34	Qiang S.; Lan M.; Nan C.	Qiang, Sha (59426425000); Lan, Ma (59426820200); Nan, Chen (59426527300)	59426425000; 59426820200; 59426527300	A Smart Tourism Resource Information Management Platform Based on Multi-Source Data Fusion	2024	10.1142/S0129156425401342	https://www.scopus.com/inward/record.uri?eid=2-s2.0-85210276580&doi=10.1142%2fS0129156425401342&partnerID=40&md5=f2f353905ab947d25775255ee2e6fb2d	Leveraging multiple data sources to enhance tourism resource management and visitor behavior analysis has become a key challenge in the context of the booming smart tourism industry. In this study, we explore how to integrate and optimize multiple data sources including social media activities, user reviews, tourism statistics, and geographic information to build a comprehensive information manag…	behavior analysis; data fusion; multi-source data; resource management; Smart tourism		Article	Scopus
35	Suanpang P.; Jamjuntr P.; Jermsittiparsert K.; Kaewyong P.	Suanpang, Pannee (6506425680); Jamjuntr, Pitchaya (35185102700); Jermsittiparsert, Kittisak (57214268798); Kaewyong, Phuripoj (57041190000)	6506425680; 35185102700; 57214268798; 57041190000	Autonomous Energy Management by Applying Deep Q-Learning to Enhance Sustainability in Smart Tourism Cities	2022	10.3390/en15051906	https://www.scopus.com/inward/record.uri?eid=2-s2.0-85126269975&doi=10.3390%2fen15051906&partnerID=40&md5=32ff4b28004a83611033df402136ccb1	Autonomous energy management is becoming a significant mechanism for attaining sustainability in energy management. This resulted in this research paper, which aimed to apply deep reinforcement learning algorithms for an autonomous energy management system of a microgrid. This paper proposed a novel microgrid model that consisted of a combustion set of a household load, renewable energy, an energ…	Autonomous energy; Deep Q-learning; Energy management; Smart city; Smart tourism; Sustainability	Costs; Deep learning; Digital storage; Electric energy storage; Electric power system control; Energy management; Energy management systems; Information management; Learning algorithms; Smart city; Sustainable development; Autonomous energy; Deep Q-learning; Effective energy; Energy; Energy prices; Microgrid; Q-learning; Reinforcement learning algorithms; Smart tourism; Tourism industry; Reinforc…	Article	Scopus
36	Li P.; Xiao X.; Seekamp E.	Li, Peizhe (57224770886); Xiao, Xiao (55553649500); Seekamp, Erin (6507285366)	57224770886; 55553649500; 6507285366	Climate adaptation planning for cultural heritages in coastal tourism destinations: A multi-objective optimization approach	2022	10.1016/j.tourman.2021.104380	https://www.scopus.com/inward/record.uri?eid=2-s2.0-85109442620&doi=10.1016%2fj.tourman.2021.104380&partnerID=40&md5=a8bd46547b354f78bbb3326a9416cd77	Substantial climate change impacts threaten the persistence of cultural resources globally. The need exists for conceptualizing decision support tools that focus on quantifying and optimizing the managerial priorities to leverage historic preservation and adaptation actions that enhance the continuity of heritage values and sites. Informed by the Structured Decision Making (SDM) approach, this st…	Climate change; Cost-efficiency; Cultural resource management; Decision support tools; Historic buildings; Historic preservation; Machine learning	United States; adaptive management; climate effect; cultural heritage; decision support system; ecotourism; machine learning; optimization; tourism development; tourist destination	Article	Scopus
37	Mariani M.; Wirtz J.	Mariani, Marcello (36817705700); Wirtz, Jochen (7004549683)	36817705700; 7004549683	A critical reflection on analytics and artificial intelligence based analytics in hospitality and tourism management research	2023	10.1108/IJCHM-08-2022-1006	https://www.scopus.com/inward/record.uri?eid=2-s2.0-85147041726&doi=10.1108%2fIJCHM-08-2022-1006&partnerID=40&md5=7097fa633b4f23fe739343b11e07bb07	Purpose: This work consists of a critical reflection on the extent to which hospitality and tourism management scholars have accurately used the term “analytics” and its five types (i.e. descriptive, exploratory, predictive, prescriptive and cognitive analytics) in their research. Only cognitive analytics, the latest and most advanced type, is based on artificial intelligence (AI) and requires ma…	Analytics; Artificial intelligence; Big data; Cognitive analytics; Hospitality; Tourism		Article	Scopus
38	Huang A.; Chao Y.; de la Mora Velasco E.; Bilgihan A.; Wei W.	Huang, Arthur (57209654394); Chao, Ying (57226291599); de la Mora Velasco, Efrén (57217093038); Bilgihan, Anil (55224657700); Wei, Wei (52564489500)	57209654394; 57226291599; 57217093038; 55224657700; 52564489500	When artificial intelligence meets the hospitality and tourism industry: an assessment framework to inform theory and management	2022	10.1108/JHTI-01-2021-0021	https://www.scopus.com/inward/record.uri?eid=2-s2.0-85111042456&doi=10.1108%2fJHTI-01-2021-0021&partnerID=40&md5=e5781bc542cf135eb5df9f8e154f5837	Purpose: This study reviews existing research and current applications of artificial intelligence (AI) in the hospitality and tourism industry. It further proposes a new evaluation framework to inform the susceptibility of AI adoptions. Design/methodology/approach: This is a synthesis and evaluation study that qualitatively summarizes and presents findings on AI applications in the hospitality an…	Artificial intelligence; Augmented reality; Deep learning; Innovations diffusion; Machine learning; Technology adoption; Virtual reality		Article	Scopus
39	Cinici M.C.; Marino A.; Pareschi L.; Baglieri D.	Cinici, Maria Cristina (51863278500); Marino, Alba (57211587379); Pareschi, Luca (57213134751); Baglieri, Daniela (35071044300)	51863278500; 57211587379; 57213134751; 35071044300	Disabilities and Accessible Tourism: Recent Development and Future Directions in Management Studies	2022	10.1007/978-3-030-93612-9_2	https://www.scopus.com/inward/record.uri?eid=2-s2.0-85166093997&doi=10.1007%2f978-3-030-93612-9_2&partnerID=40&md5=7c69edcc999111055bf9c37d768f7dc9	This chapter uses bibliometrics and topic modeling to explore the accessible tourism research domain structure and builds on this result to adjust its scope and applications in management fields. As far as bibliometrics is concerned, the co-authorship analysis highlights the field’s invisible college by identifying the most impactful scholars in the research area and the degree of their collabora…			Book chapter	Scopus
40	Jung S.; Zhang R.Y.; Chen Y.; Joe S.	Jung, Shinyong (57189716581); Zhang, Rachel Yueqian (59149361500); Chen, Yangsu (56420880000); Joe, Sungjun (57200690722)	57189716581; 59149361500; 56420880000; 57200690722	Optimizing demand forecasting for business events tourism: a comparative analysis of cutting-edge models	2025	10.1108/JHTI-12-2023-0960	https://www.scopus.com/inward/record.uri?eid=2-s2.0-85194542540&doi=10.1108%2fJHTI-12-2023-0960&partnerID=40&md5=499594e2528d21e44b7afd7fd499f1dd	Purpose: Given the unique nature of business events tourism, this paper evaluates the forecasting performance of various models using search query data (SQD) to forecast convention attendance. Design/methodology/approach: This research uses monthly and quarterly business event attendance data from both the U.S. (Las Vegas) and China (Macau) markets. Using SQD as the input, we evaluated and compar…	Business events tourism; Demand forecasting; Prophet; Search query data; Time-series		Article	Scopus
41	Li M.; Li R.; Wu Y.	Li, Min (57829807400); Li, Rong (57829691100); Wu, Yongcheng (57829691200)	57829807400; 57829691100; 57829691200	Dynamic Monitoring Method of Rural Tourism Popularity Based on Big Data Management Technology	2022	10.1155/2022/9086946	https://www.scopus.com/inward/record.uri?eid=2-s2.0-85135369967&doi=10.1155%2f2022%2f9086946&partnerID=40&md5=197c8a3050ff4d2efa12ff96cc2db815	Great achievements have been made in the construction of new countryside, and rural tourism is an emerging industry. Rural tourism is an industry developed during the construction of new countryside, which promotes the development of rural economy. More and more people are going to the countryside to experience the life and scenery of the countryside. For managers of rural tourism, the dynamic mo…		Convolutional neural networks; Information management; Long short-term memory; Managers; Construction of new countrysides; Data technologies; Dynamic monitoring; Financial resources; Management technologies; Monitoring methods; New rural; Research use; Rural economy; Rural tourisms; Big data	Article	Scopus
42	Cai M.; Gunaban M.G.B.	Cai, Ming (58966894800); Gunaban, Mary Geraldine B. (58887804900)	58966894800; 58887804900	Construction of Instructional Quality Assessment Model of Tourism Management Specialty Based on BPNN Algorithm	2023	10.1109/ICAML60083.2023.00057	https://www.scopus.com/inward/record.uri?eid=2-s2.0-85189245772&doi=10.1109%2fICAML60083.2023.00057&partnerID=40&md5=724a8e8d68ab634d7fac8ed2ac51af2a	With the growth of the times, more and more people now choose tourism management major. The quality assessment of practical teaching of tourism management specialty is a difficult problem in the practical teaching of tourism management specialty in universities, and it is also an important part of the instructional plan of tourism management specialty in universities, and the main way of practica…	Back propagation neural network; Instructional quality assessment; Tourism management	Neural networks; Torsional stress; Back-propagation neural networks; Comprehensive monitoring; Instructional plans; Instructional qualities; Instructional quality assessment; Neural networks algorithms; Practical teachings; Quality assessment; Quality assessment model; Tourism management; Students	Conference paper	Scopus
43	Souha A.; Benaddi L.; Ouaddi C.; Bouziane E.M.; Jakimi A.	Souha, Adnane (58816417300); Benaddi, Lamya (58816335000); Ouaddi, Charaf (58816334900); Bouziane, El Mahi (57204502717); Jakimi, Abdeslam (24724576600)	58816417300; 58816335000; 58816334900; 57204502717; 24724576600	A New Decision Support System for Enhancing Tourism Destination Management and Competitiveness	2024	10.1109/WINCOM62286.2024.10658530	https://www.scopus.com/inward/record.uri?eid=2-s2.0-85204298460&doi=10.1109%2fWINCOM62286.2024.10658530&partnerID=40&md5=e4ffc325dbb08347faa7287f756a42ec	The feedback provided by tourists is a key factor in the success of any tourist destination, as it serves as an indicator of the level of satisfaction with various aspects of their stay. This paper introduces a new decision support system designed to assist stakeholders of tourist destinations in making informed decisions regarding amenities and activities. It focuses on various aspects such as l…	aspect recognition; decision support system; deep learning; sentiment analysis; text classification; tourism destination	Deep learning; Natural language processing systems; Tourism; Aspect recognition; Decision supports; Deep learning; Language processing; Natural languages; Sentiment analysis; Support systems; Text classification; Tourism destination; Tourist destinations; Leisure	Conference paper	Scopus
44	Kim J.H.; Kim J.; Park J.; Kim C.; Jhang J.; King B.	Kim, Jeong Hyun (58485541700); Kim, Jungkeun (36995765400); Park, Jooyoung (56652865600); Kim, Changju (56156300600); Jhang, Jihoon (57362523900); King, Brian (55458625100)	58485541700; 36995765400; 56652865600; 56156300600; 57362523900; 55458625100	When ChatGPT Gives Incorrect Answers: The Impact of Inaccurate Information by Generative AI on Tourism Decision-Making	2025	10.1177/00472875231212996	https://www.scopus.com/inward/record.uri?eid=2-s2.0-85178417322&doi=10.1177%2f00472875231212996&partnerID=40&md5=8489f62312d3a5b6ded201b033c78505	This study investigates how inaccurate information provided by ChatGPT impacts travelers’ acceptance of recommendations. Six experiments were conducted based on the accessibility-diagnosticity framework. These examined the moderating role of the prominence and type of incorrect information and their effects on decision-making. The results show that participants perceived more accuracy and trustwo…	accessibility-diagnosticity; AI recommendations; chatbot; ChatGPT; generative AI; incorrect information	accessibility; artificial intelligence; boundary condition; decision making; information; software; tourism	Article	Scopus
45	Alnasser E.M.; Alkhozaim S.M.; Alshiha A.A.; Al-Romeedy B.S.	Alnasser, Emad Mohammed (59222461700); Alkhozaim, Sultan Mohammed (59221482900); Alshiha, Ahmed Abdulaziz (57416834100); Al-Romeedy, Bassam Samir (57210847311)	59222461700; 59221482900; 57416834100; 57210847311	Beyond the storm: Harnessing AI for effective tourism crisis management	2024	10.4018/979-8-3693-6755-1.ch022	https://www.scopus.com/inward/record.uri?eid=2-s2.0-85204336287&doi=10.4018%2f979-8-3693-6755-1.ch022&partnerID=40&md5=f583c3140706fb02a8becf14c67b5132	This study explores the impact of artificial intelligence (AI) on both smart human resources and crisis management. It also examines how smart human resources influences crisis management and mediates the relationship between AI and crisis management. PLS-SEM and WarpPLS 7.0 statistical software were employed to analyze survey responses from 464 managers and supervisors at travel agencies, hotels…			Book chapter	Scopus
46	Skare M.; Gavurova B.; Polishchuk V.	Skare, Marinko (6506322858); Gavurova, Beata (37118698100); Polishchuk, Volodymyr (57204564304)	6506322858; 37118698100; 57204564304	A large-scale decision-making model for the expediency of funding the development of tourism infrastructure in regions	2025	10.1111/exsy.13443	https://www.scopus.com/inward/record.uri?eid=2-s2.0-85169814593&doi=10.1111%2fexsy.13443&partnerID=40&md5=fa7ad3e98194def59a3780f48ff0f00c	The main goal of this study was to develop a hybrid decision-making support model regarding the feasibility of financing the development of tourism infrastructure of regions for V4 countries, based on the predicted assessment of the level of tourist movement in relation to the infrastructure and accessibility of the studied regions, expert opinions regarding the level of quality of tourist servic…	decision-making; feasibility of funding; hybrid data; neuro-fuzzy networks; predictive analytics; tourist infrastructure	Finance; Fuzzy inference; Fuzzy neural networks; Predictive analytics; Decisions makings; Feasibility of funding; Fundings; Hybrid datum; Neuro-fuzzy network; Rapid growth; Services development; Tourism development; Tourism infrastructure; Tourist infrastructure; Decision making	Article	Scopus
47	Li Y.	Li, Yanyan (59161055800)	59161055800	Research on the Development of Digital Business Forecasting in the 'Commerce, Culture, and Tourism Plus' Model Based on Big Data and Predictive Models	2023	10.1145/3656766.3656940	https://www.scopus.com/inward/record.uri?eid=2-s2.0-85195313025&doi=10.1145%2f3656766.3656940&partnerID=40&md5=05340e7e68f315a1b67e9fb95770cf1d	In the face of the rapid development of digital business, accurate forecasting is of significant importance. This study constructs a business forecasting model based on deep learning to improve prediction accuracy. Data from tourism platform users and orders are collected, and a dataset is constructed through data processing. The study designs a deep neural network model that combines user inform…	Business Forecasting; Deep Learning; Digital Business	Big data; Deep neural networks; E-learning; Forecasting; Learning systems; Neural network models; Regression analysis; Tourism; Business forecasting; Deep learning; Digital business; Forecasting models; Model-based OPC; Neural network model; Prediction accuracy; Predictive models; Study design; User information; Data handling	Conference paper	Scopus
48	del Mar Alonso-Almeida M.; Giglio C.	del Mar Alonso-Almeida, Maria (35321918500); Giglio, Carlo (56123229700)	35321918500; 56123229700	CYBERSECURITY IN TOURISM AND HOSPITALITY MANAGEMENT RESEARCH: CURRENT ISSUES, TRENDS, AND AN AGENDA FOR FUTURE RESEARCH; [Ciberseguridad en la investigación en turismo y hotelería: temas de actualidad, tendencias y una agenda para futuras investigaciones]	2024	10.6018/turismo.616471	https://www.scopus.com/inward/record.uri?eid=2-s2.0-85198295868&doi=10.6018%2fturismo.616471&partnerID=40&md5=c2ed50d2d90a4fc6957311c0717dbe39	This paper compares two literature reviews on cybersecurity issues focused on the mature organisations, business and management field, and the embryonic tourism and hospitality area. Hence, we use the general study on the former as a benchmark for the narrower review on the latter, to map the current trends and identify the corresponding gaps. Findings suggest the following topic clusters for fut…	cyber education; cyberattack; cybercrime; Cybersecurity		Review	Scopus
49	Schuhbert A.; Thees H.; Pechlaner H.	Schuhbert, Arne (57215591254); Thees, Hannes (57209417771); Pechlaner, Harald (6603383221)	57215591254; 57209417771; 6603383221	Deep and organizational learning as innovation catalyzer in digital business ecosystems – a scenario analysis on the tourism destination Berlin	2024	10.1108/EJIM-08-2022-0448	https://www.scopus.com/inward/record.uri?eid=2-s2.0-85150647352&doi=10.1108%2fEJIM-08-2022-0448&partnerID=40&md5=3944f93c87595297293b3fc42ffff7c2	Purpose: The below-average innovative capacity of the tourism sector raises the question on the potentials of digital business ecosystems (DBEs) to overcome these shortages at a destination level – especially within a smart city environment. Using the example of the German Capital Berlin, this article aims to discuss both the possibilities and inhibitors of innovative knowledge-creation by buildi…	Deep learning; Destination Berlin; Digital business eco-systems; Digital platforms; Innovation processes; Organizational learning		Article	Scopus
50	Yang L.; Huang X.	Yang, Ling (58155378300); Huang, Xin (58155378400)	58155378300; 58155378400	Research on Tourism Resources Management Method Based on Deep Learning and Knowledge Graph	2022	10.1109/ISCSIC57216.2022.00036	https://www.scopus.com/inward/record.uri?eid=2-s2.0-85150854742&doi=10.1109%2fISCSIC57216.2022.00036&partnerID=40&md5=393ea36468f74cb22fa04eb7aa3e75fa	In order to improve the efficiency of tourism resources management and the accuracy of tourism resources recommendation, a personalized recommendation method for tourism resources based on deep learning and knowledge graph was proposed. Firstly, the feature vectors of attractions were represented based on the Node2Vec method in knowledge graph feature learning. Then, the potential feature vectors…	feature vector; GRU; knowledge graph; tourism resources	Knowledge graph; Tourism; Vectors; Features vector; GRU; Index values; Knowledge graphs; Learning graphs; Management method; Recommendation methods; Resource management; Resource recommendation; Tourism resource; Deep learning	Conference paper	Scopus
51	Alnasser E.M.; Alkhozaim S.M.; Alshiha A.A.; Al-Romeedy B.S.	Alnasser, Emad Mohammed (59222461700); Alkhozaim, Sultan Mohammed (59221482900); Alshiha, Ahmed Abdulaziz (57416834100); Al-Romeedy, Bassam Samir (57210847311)	59222461700; 59221482900; 57416834100; 57210847311	The impact of artificial intelligence on the marketing performance of tourism and hospitality businesses: The mediating role of marketing innovation	2024	10.4018/979-8-3693-7909-7.ch019	https://www.scopus.com/inward/record.uri?eid=2-s2.0-85203031974&doi=10.4018%2f979-8-3693-7909-7.ch019&partnerID=40&md5=4632a328dfb5bd868aba05e5049b7605	This study examines the impact of artificial intelligence (AI) on marketing innovation and marketing performance. It also explores how marketing innovation affects marketing performance and investigates the mediating role of marketing innovation in the relationship between AI and marketing performance. To analyze survey responses from 398 employees at travel agencies in Egypt and Saudi Arabia, th…			Book chapter	Scopus
52	Wen L.	Wen, Liling (58694644400)	58694644400	Design of Tourism Information Management System Based on Fuzzy Clustering Algorithm	2023	10.1109/AIARS59518.2023.00036	https://www.scopus.com/inward/record.uri?eid=2-s2.0-85176605159&doi=10.1109%2fAIARS59518.2023.00036&partnerID=40&md5=87140e3e8346bb7b0ec63fc4fff0a104	High-pressure and high-efficiency work makes people's leisure style tend to travel more and more. With the rapid growth of modern network technology, people can not only take part in traveling through physical channels such as travel agencies, but also make more choices of travel behaviors depend on the interaction of network information. In order to further improve the efficiency of tourism mana…	Fuzzy clustering algorithm; Information retrieval; Wisdom tourism	Behavioral research; Clustering algorithms; Decision making; Efficiency; Fuzzy clustering; Information management; Search engines; Fuzzy clustering algorithm; High pressure; Higher efficiency; Information management systems; Information retrieval models; Network technologies; Physical channels; Rapid growth; Travel agency; Wisdom tourism; Information retrieval	Conference paper	Scopus
53	Hu J.; Huang G.I.; Wong I.A.; Wan L.C.	Hu, Jihao (57862753700); Huang, GuoQiong Ivanka (57201804406); Wong, IpKin Anthony (35331164000); Wan, Lisa C. (16318214900)	57862753700; 57201804406; 35331164000; 16318214900	AI trust divide: How recruiter-candidate roles shape tourism personnel decision-making	2024	10.1016/j.annals.2024.103860	https://www.scopus.com/inward/record.uri?eid=2-s2.0-85207019534&doi=10.1016%2fj.annals.2024.103860&partnerID=40&md5=1b3304fc330e543cc3a2a6cd178632a6	The artificial intelligence revolution has prompted tourism organizations to consider whether and how to use AI to improve efficiency and create value, particularly in areas such as personnel selection. Through five experimental studies (N = 2199), this paper first reveals that a trust divide exists between job candidates and recruiters in travel agencies. We then investigate how the consideratio…	Artificial intelligence (AI); Motivated reasoning; Personnel decision-making agent; Quasi-experiment; Scenario-based experiment	artificial intelligence; decision making; experimental study	Article	Scopus
54	Nag A.; Mishra S.	Nag, Aditi (57234834100); Mishra, Smriti (58493527200)	57234834100; 58493527200	Tourism Management with AI Integration for Mining Heritage: a Literature Review Approach	2024	10.22044/jme.2023.13473.2490	https://www.scopus.com/inward/record.uri?eid=2-s2.0-85182497377&doi=10.22044%2fjme.2023.13473.2490&partnerID=40&md5=bff1c325d941c38f82d830073ac77d68	Integrating Artificial Intelligence (AI) into heritage tourism has opened new avenues for transforming visitors’ engagement with historical sites. This research paper delves into a novel paradigm, focusing on AI integration in inter-and intra-regional mining heritage site planning and design. Recognizing this context's unique challenges and opportunities, the study aims to uncover critical ideas …	Artificial intelligence; Heritage tourism; Mining heritage; Sustainable development; Tourism management		Review	Scopus
55	Ajaz M.A.; Saeed A.; Yaseen A.; Syed A.; Muthmainnah M.	Ajaz, Maria Ahmed (59133028400); Saeed, Aiza (59251565800); Yaseen, Ayesha (59251599900); Syed, Aleena (59251600000); Muthmainnah, M. (57200720707)	59133028400; 59251565800; 59251599900; 59251600000; 57200720707	Effects of artificial intelligence on tourism business: How European hospitality industry responded	2024	10.1108/978-1-83753-746-420241007	https://www.scopus.com/inward/record.uri?eid=2-s2.0-85200711590&doi=10.1108%2f978-1-83753-746-420241007&partnerID=40&md5=9b8768cad92888d7cfab32729126047a	The tourism industry is undergoing a rapid transformation brought on by artificial intelligence (AI), which is offering a wide range of benefits to both businesses and their customers. Nevertheless, this technological advancement also poses a number of difficulties for which the sector will need to find solutions. This chapter investigates the effects that artificial intelligence (AI) has had on …	Artificial intelligence; ChatGPT^European tourism; Hospitality industry; Social media; Tourism		Book chapter	Scopus
56	Gao X.; Qi Y.; Chai Y.; Lei C.; Wang J.	Gao, Xuan (57681420600); Qi, Yuan (57681420500); Chai, Yong (57760706300); Lei, Chun (57760484500); Wang, Jiefei (57760593500)	57681420600; 57681420500; 57760706300; 57760484500; 57760593500	Tourism Information Management System Using Neural Networks Driven by Particle Swarm Model	2022	10.1155/2022/6386360	https://www.scopus.com/inward/record.uri?eid=2-s2.0-85132619635&doi=10.1155%2f2022%2f6386360&partnerID=40&md5=ea80b0b69dc57a20ae86fbcf6c44ae8c	Based on the concept of "smart tourism,"this paper designs and implements a tourism management information system based on PSO-optimized NN. The foreground tourism web page of the system adopts DIV + CSS mode for page planning and layout, PHP as the client script language, and SQL server as the database to store and analyze user information. At the same time, the system adds personalized componen…		Algorithms; Humans; Information Management; Management Information Systems; Neural Networks, Computer; Tourism; Information management; Information use; Search engines; Websites; Design and implements; Information management systems; Neural-networks; Particle swarm; Planning and layouts; Script Languages; Swarm model; Tourism industry; Tourism management; Web-page; algorithm; human; information s…	Article	Scopus
57	Sankar J.G.; David A.	Sankar, Jeganathan Gomathi (58630627000); David, Arokiaraj (57208545896)	58630627000; 57208545896	Transforming the travel landscape: Smart contracts in tourism management	2024	10.4018/979-8-3693-1532-3.ch012	https://www.scopus.com/inward/record.uri?eid=2-s2.0-85190913778&doi=10.4018%2f979-8-3693-1532-3.ch012&partnerID=40&md5=5079132986045314e80bbed277ad9a58	This chapter explores smart contract integration in tourism, examining its current state, applications, challenges, and future trajectories. Leveraging blockchain, smart contracts enhance transaction security and transparency, addressing fraud concerns. They significantly cut costs and boost efficiency in booking and payment, benefiting travelers and service providers with increased control and t…			Book chapter	Scopus
58	El Hajal G.; Yeoman I.	El Hajal, Georges (58580457300); Yeoman, Ian (10439767800)	58580457300; 10439767800	AI and the future of talent management in tourism and hospitality	2024	10.1080/13683500.2024.2439395	https://www.scopus.com/inward/record.uri?eid=2-s2.0-85211485612&doi=10.1080%2f13683500.2024.2439395&partnerID=40&md5=3762b19b83f74e92e8942be2cc7de6dd	This exploratory study investigates artificial intelligence (AI) integration’s potential impact on the future of talent management in tourism and hospitality. Using the scenario planning method and Dator’s Alternative Futures Framework, four 2035 alternative scenarios were constructed. These scenarios served as a foundation for 3 group and 30 individual scenario-planning sessions with internation…	Artificial intelligence; employee outcomes; ethical AI; scenario planning; talent management; tourism and hospitality jobs		Article	Scopus
59	Boon Q.W.; Sulaiman T.; Razali F.	Boon, Quah Wei (54884647200); Sulaiman, Tajularipin (35103704800); Razali, Fazilah (57214795090)	54884647200; 35103704800; 57214795090	Innovative Integration of Experiential Learning in Hospitality and Tourism Management Education: A Systematic Review	2024	10.1007/978-3-031-71213-5_4	https://www.scopus.com/inward/record.uri?eid=2-s2.0-85210161772&doi=10.1007%2f978-3-031-71213-5_4&partnerID=40&md5=cc88e05c1b2c60eb339ac99f886ceac8	Experiential learning has been described as the most effective approach in tourism and hospitality management education. Various experiential learning methods have been used to enhance students’ learning experience. There are many experiential learning methods which can cater to different subjects. This way of using these experiential learning methods has significant consequences for teaching and…	Experiential learning projects; Field trips; Restaurant; Role-playing; Service-learning; Simulation	Adversarial machine learning; Federated learning; Leisure; Self-supervised learning; Students; Tourism; Experiential learning; Experiential learning project; Field trips; Learning methods; Learning projects; Management education; Restaurant; Role playing; Service learning; Simulation; Contrastive Learning	Book chapter	Scopus
60	Hou W.; Wang K.	Hou, Wenyuan (59463767000); Wang, Kai (59464313700)	59463767000; 59464313700	Research on Modeling of Influencing Factors of New Eco-tourism Management Based on Economic Fluctuation Prediction	2024	10.1016/j.procs.2024.09.139	https://www.scopus.com/inward/record.uri?eid=2-s2.0-85211342209&doi=10.1016%2fj.procs.2024.09.139&partnerID=40&md5=44344bdf3d6321ddb61d41926a14c313	This paper begins by analyzing the effect of market economic fluctuations on the digital economy's tourism economy. Second, this paper uses a city cluster in the Yangtze River Delta in China as an example, selects the tourism economic data of the region from 2011 to 2021, and forecasts the tourism development potential of the region from 2022 to 2026 using the conventional methods for predicting …	ARIMA; Eco-tourism Management; Economic fluctuation prediction; Influencing factors	Circular economy; Inflation; ARIMA; Digital economy; Eco-tourism management; Eco-tourisms; Economic fluctuation prediction; Economic fluctuations; Influencing factor; Market economics; Tourism management; Yangtze river delta; Prediction models	Conference paper	Scopus
61	Tuomi A.; Tussyadiah I.; Ascenção M.P.	Tuomi, Aarni (57207467461); Tussyadiah, Iis (8286650200); Ascenção, Mário Passos (55962943200)	57207467461; 8286650200; 55962943200	Customized language models for tourism management: Implications and future research	2025	10.1016/j.annals.2024.103863	https://www.scopus.com/inward/record.uri?eid=2-s2.0-85207769259&doi=10.1016%2fj.annals.2024.103863&partnerID=40&md5=d25bfd5e846c49e73f85506d00f1fb8c	[No abstract available]	Artificial intelligence; Chatgpt; Human-artificial intelligence interaction; Human-computer interaction	artificial intelligence; hotel industry; language; technology adoption; tourism development; tourism management	Article	Scopus
62	Yang S.; Li Q.; Jang D.; Kim J.	Yang, Sigeon (58770574600); Li, Qinglong (57224548864); Jang, Dongsoo (58826762300); Kim, Jaekyeong (7601382361)	58770574600; 57224548864; 58826762300; 7601382361	Deep learning mechanism and big data in hospitality and tourism: Developing personalized restaurant recommendation model to customer decision-making	2024	10.1016/j.ijhm.2024.103803	https://www.scopus.com/inward/record.uri?eid=2-s2.0-85194282306&doi=10.1016%2fj.ijhm.2024.103803&partnerID=40&md5=73437e388cfb6fc3d4227089c37477c1	With the increasing ubiquity of booking restaurants through online platforms, the need for restaurant recommender systems that satisfy individual preferences has grown. Previous studies have found it challenging to reflect preferences in multiple aspects because customers' restaurant experiences were approached from a single aspect. This study proposes a novel personalized recommender system that…	Aspect-based sentiment analysis; Online platforms; Recommender system; Restaurant; Restaurant reviews		Article	Scopus
63	Amiri M.; Ramos C.M.Q.	Amiri, Mahsa (58744959500); Ramos, Célia M. Q. (35073165500)	58744959500; 35073165500	Potential of business intelligence and analytics on the performance of tourism and hospitality companies	2024	10.4018/979-8-3693-0790-8.ch011	https://www.scopus.com/inward/record.uri?eid=2-s2.0-85195624152&doi=10.4018%2f979-8-3693-0790-8.ch011&partnerID=40&md5=d11d086a614c2de0554096df58764c13	Nowadays, making the right business decisions is crucial for companies. With the enhancements in connectivity, data accessibility has been expanding rapidly. Information is meaningful, data and business intelligence (BI) turn data into information to support the decisions of persons or companies with the purpose of efficiency and effectiveness increasing. However, selecting the right BI system wh…			Book chapter	Scopus
64	Çalışkan G.; Yayla İ.; Pamukçu H.	Çalışkan, Gürkan (57356455900); Yayla, İsa (58166976400); Pamukçu, Hüseyin (57215936155)	57356455900; 58166976400; 57215936155	The use of augmented reality technologies in tourism businesses from the perspective of UTAUT2	2023	10.1108/EJIM-04-2023-0271	https://www.scopus.com/inward/record.uri?eid=2-s2.0-85180508150&doi=10.1108%2fEJIM-04-2023-0271&partnerID=40&md5=946dd47e7a5ed9ba29d749157516fbb3	Purpose: Augmented reality is one of the technologies that developed and became widespread, especially after the 2000s. It is seen that innovations such as 3D virtual reality glasses, artificial intelligence-supported smart chatbots that communicate with customers in a virtual environment, keyless hotel systems, the Internet of Things, augmented reality applications, smart personal assistants, di…	Application developers; Augmented reality; Digital marketing agencies; Tourism; Tourism businesses		Article	Scopus
65	Gao Y.; Yan X.	Gao, Yuan (59089797500); Yan, Ximu (58318134400)	59089797500; 58318134400	Data analysis framework of tourism enterprise human resource management system based on MySQL and fuzzy clustering	2023	10.1007/s13198-023-01969-2	https://www.scopus.com/inward/record.uri?eid=2-s2.0-85162207979&doi=10.1007%2fs13198-023-01969-2&partnerID=40&md5=e31337bc00abecd1f082b9b6e21e9e81	The essential task of enterprise human resource management is complicated, involving many departments, so the work is difficult. By applying data analysis technology to enterprise human resource management, the way of human resource management can be expanded. The competition among enterprises is mainly the competition of enterprise talents. If the company has top talents in the industry, they ca…	Bee colony optimization algorithm; Data analysis; Database; Fuzzy clustering; Human resource management; Neural network; Tourism enterprises	Clustering algorithms; Competition; Distributed database systems; Fuzzy clustering; Human resource management; Information analysis; Information management; Investments; Natural resources management; Neural networks; Resource allocation; Analysis frameworks; Bee colony optimization algorithm; Bee colony optimizations; Enterprise human resource; Fuzzy clustering algorithm; Human resource managemen…	Article	Scopus
66	Borrero J.D.; Mariscal J.; Vargas-Sánchez A.	Borrero, Juan D. (55857659200); Mariscal, Jesús (57358139600); Vargas-Sánchez, Alfonso (6506074995)	55857659200; 57358139600; 6506074995	A New Predictive Algorithm for Time Series Forecasting Based on Machine Learning Techniques: Evidence for Decision Making in Agriculture and Tourism Sectors	2022	10.3390/stats5040068	https://www.scopus.com/inward/record.uri?eid=2-s2.0-85144728380&doi=10.3390%2fstats5040068&partnerID=40&md5=9d3f44ce4a995f1e601874eca362f748	Accurate time series prediction techniques are becoming fundamental to modern decision support systems. As massive data processing develops in its practicality, machine learning (ML) techniques applied to time series can automate and improve prediction models. The radical novelty of this paper is the development of a hybrid model that combines a new approach to the classical Kalman filter with ma…	Kalman filter; nonlinear autoregressive neural networks; support vector regression model; time series prediction		Article	Scopus
67	Lan M.	Lan, Man (59154872000)	59154872000	Big Data and Cloud Computing- Integrated Tourism Decision-Making in Smart Logistics Technologies	2023	10.4018/ijec.316880	https://www.scopus.com/inward/record.uri?eid=2-s2.0-85195063144&doi=10.4018%2fijec.316880&partnerID=40&md5=b6ebaf8b9f02299af2afbf1f78121179	Since technology allows tourist companies to replace expensive human labor with electronic labor, labor expenses are reduced, yet customer service concerns are often avoided. Companies and organizations face new challenges daily. Increased consumer demands and global competition result in significant adjustments in the industrialized world. On the other hand, technology can bring forth entirely n…	Behaviour; Big Data; Cloud Computing; Decision-Making; E-Business; Mobile Commerce; Smart Logistics; Tourism Management	Big data; Cloud computing; Consumer behavior; Data mining; Deep learning; Mobile commerce; Behavior; Cloud-computing; Customer-service; Decisions makings; E-business; Human labor; Labor expense; Logistics technologies; Smart logistic; Tourism management; Decision making	Article	Scopus
68	Razali M.N.; Manaf S.A.; Hanapi R.B.; Salji M.R.; Chiat L.W.; Nisar K.	Razali, Mohd Norhisham (57219099651); Manaf, Syaifulnizam Abdul (58987883700); Hanapi, Rozita Binti (37041114400); Salji, Mohd Rafiz (57192989626); Chiat, Lee Wen (57779658600); Nisar, Kashif (58882327500)	57219099651; 58987883700; 37041114400; 57192989626; 57779658600; 58882327500	Enhancing Minority Sentiment Classification in Gastronomy Tourism: A Hybrid Sentiment Analysis Framework with Data Augmentation, Feature Engineering and Business Intelligence	2024	10.1109/ACCESS.2024.3362730	https://www.scopus.com/inward/record.uri?eid=2-s2.0-85184819725&doi=10.1109%2fACCESS.2024.3362730&partnerID=40&md5=63578396a4a3526dda4db8f4ec2968af	The gastronomy tourism industry plays an important role in boosting local economies, enhancing the travel experience, and preserving culinary traditions unique to specific places. In this context, comprehending customer sentiments is of paramount importance for business decision-making, menu choice offerings, marketing strategies, and customer service improvements. Traditional sentiment analysis …	Business analytics; data visualization; machine learning; sentiment analysis; tourism industry	Classification (of information); Data mining; Data visualization; Learning algorithms; Learning systems; Reliability analysis; Sales; Support vector machines; Visualization; Business analytics; Cultural difference; Machine learning algorithms; Machine-learning; Sentiment analysis; Sentiment classification; Support vectors machine; Tourism industry; Sentiment analysis	Article	Scopus
69	Elsawy T.M.	Elsawy, Tamer M. (59015007900)	59015007900	Harnessing appreciative inquiry in tourism planning: towards a strategy for poverty alleviation in marginalised communities	2024	10.1108/IJTC-10-2023-0208	https://www.scopus.com/inward/record.uri?eid=2-s2.0-85188341549&doi=10.1108%2fIJTC-10-2023-0208&partnerID=40&md5=782eefa0f438caef4b874d8a868ad215	Purpose: This study aims to apply the appreciative inquiry approach (AI) to develop a tourism strategy for poverty alleviation in marginalised communities. The focus is to provide practical insights for leveraging tourism to drive positive socio-economic change for the impoverished, using Rosetta, a port city in Egypt with cultural and historical significance, as a case study. Design/methodology/…	Appreciative-inquiry-approach; Egypt; Policymaking; Poverty-alleviation; SDGs; Small-tourism-cities		Article	Scopus
70	Ranga K.K.; Nagpal C.K.; Vedpal	Ranga, Kamal Kumar (57170484200); Nagpal, Chander Kumar (24587210000); Vedpal (55584312500)	57170484200; 24587210000; 55584312500	Trip Planner: A Big Data Analytics Based Recommendation System for Tourism Planning	2023	10.17762/ijritcc.v11i3s.6176	https://www.scopus.com/inward/record.uri?eid=2-s2.0-85156115579&doi=10.17762%2fijritcc.v11i3s.6176&partnerID=40&md5=2b840116d7fb23f3526255cd3e9cbc5a	Foreign tourism has gained immense popularity in the recent past. To make a rational decision about the destination to be visited one has to go through variety of social media sources with very large number of reviews, which is a tedious task. Automated analysis of these reviews is quite complex as it involves non structured text data having slang terms also. Moreover, these reviews are pouring i…	Big Data Analytics; Deep Learning; International Tourism; Recommendation System; Sentiment Analysis; Sentiment Score		Article	Scopus
71	Zhu S.; Song M.; Duan Y.	Zhu, Sitian (59493277300); Song, Mengmeng (57194701773); Duan, Yucong (56328556200)	59493277300; 57194701773; 56328556200	Emotional arousal: how artificial intelligence-generated content influences tourism decision-making	2024	10.1080/02508281.2024.2439321	https://www.scopus.com/inward/record.uri?eid=2-s2.0-85213567091&doi=10.1080%2f02508281.2024.2439321&partnerID=40&md5=c67247fba84b791bcd1d7d7fadcfba16	The application of generative artificial intelligence in the tourism industry is deepening and playing a key role in enhancing personalized services. However, there are still significant gaps in specific studies dealing with the subsequent impact on tourists’ actual decisions and their economic significance. Based on prospect theory and social impact theory, this study explores in depth the effec…	Artificial intelligence-generative content; emotional arousal; generative artificial intelligence; goal-framing; prospect theory		Article	Scopus
72	Gupta V.P.	Gupta, Vijay Prakash (57199940779)	57199940779	Leveraging Digital Transformation in Marketing of Home-Stay Businesses to Promote Tourism: in the Hospitality Industry	2024	10.4324/9781003488248-8	https://www.scopus.com/inward/record.uri?eid=2-s2.0-85196453613&doi=10.4324%2f9781003488248-8&partnerID=40&md5=78666487cd900788496c3e1b335f6933	Recent advancements in digital technology have led to a significant shift in marketing methods within the hotel business. Recognizing the potential for tourism marketing, homestay firms have actively pursued digital transformation. This involves incorporating digital technology to enhance productivity, customer experience, and competitiveness. According to a 2020 Deloitte report, 89% of hospitali…			Book chapter	Scopus
73	González-Mendes S.; González-Sanchez R.; Alonso-Muñoz S.	González-Mendes, Soraya (58563044800); González-Sanchez, Rocío (57929495400); Alonso-Muñoz, Sara (57219090619)	58563044800; 57929495400; 57219090619	Exploring the influence of artificial intelligence on the management of hospitality and tourism sectors: A bibliometric overview	2024	10.1515/9783111172408014	https://www.scopus.com/inward/record.uri?eid=2-s2.0-85193829146&doi=10.1515%2f9783111172408014&partnerID=40&md5=3f9a885a9ca740ab30be04b1ba85b044	Artificial intelligence (AI) is transforming the tourism industry, improving data classification and analysis, forecasting systems, customer trends and habits, with both voice and facial recognition. This study conducts a bibliometric analysis using VOSviewer software to understand the state of the art of AI and its application in the hospitality and tourism industry from 1996 to January 2023. Da…	Artificial Intelligence; Hospitality Industry; Research Agenda; Tourism	Application programs; Augmented reality; Face recognition; Metadata; Bibliometric; Bibliometrics analysis; Customer trends; Data classification; Facial recognition; Forecasting system; Hospitality industry; Research agenda; Tourism industry; Tourism sectors; Robotics	Book chapter	Scopus
74	Zuo L.; Savin V.; Wu Y.	Zuo, Lei (59328868400); Savin, Viktor (57202032989); Wu, Yujuan (56435104900)	59328868400; 57202032989; 56435104900	Insight Analysis of Tourists' Behavior and Preference by Deep Learning in Tourism Destination Management	2023	10.1109/ICI3C60830.2023.00029	https://www.scopus.com/inward/record.uri?eid=2-s2.0-85209951235&doi=10.1109%2fICI3C60830.2023.00029&partnerID=40&md5=a4401885660c3212d4e81090e69e1f5e	With the rapid development of tourism, the application of deep learning technology in tourism destination management has gradually attracted widespread attention. The purpose of this study is to explore the potential value of deep learning in the insight analysis of tourists' behavior and preferences, so as to provide better decision support for tourism destination management. By analyzing the ma…	Deep Learning; Preference; sentiment analysis; Tourism Destination Management; Tourists' Behavior	Leisure; Tourism; Decision supports; Deep learning; Learning technology; Massive data; Potential values; Preference; Sentiment analysis; Social media; Tourism destination management; Tourist behavior; Contrastive Learning	Conference paper	Scopus
75	Zuo L.; Wu Y.; Kalmanbetova G.	Zuo, Lei (59328868400); Wu, Yujuan (56435104900); Kalmanbetova, Gulzat (57803458000)	59328868400; 56435104900; 57803458000	Design of Risk Management Decision-making Framework for Tourism Enterprises Based on Artificial Intelligence	2023	10.1145/3648050.3648083	https://www.scopus.com/inward/record.uri?eid=2-s2.0-85204080824&doi=10.1145%2f3648050.3648083&partnerID=40&md5=103f6162d03e37866efb1a7b460b336d	As a global industry, tourism not only faces increasingly fierce competition, but also bears the threat of many internal and external risks. In this complex and changeable environment, tourism enterprises urgently need effective risk management decision-making mechanism to ensure business sustainability and profitability. This paper is devoted to designing a risk management decision-making framew…	Artificial Intelligence; Risk Management; Tourism Enterprises	Decentralized finance; Tourism; Business sustainability; Decision-making frameworks; Decision-making mechanisms; Global industry; Informatization; Key elements; Management decision-making; Risk factors; Risks management; Tourism enterprise; Leisure	Conference paper	Scopus
76	Amiri M.; Ramos C.M.Q.	Amiri, Mahsa (58744959500); Ramos, Célia M. Q. (35073165500)	58744959500; 35073165500	Effects and potentials of business intelligence tools on tourism companies in a tourism 4.0 environment	2023	10.4018/978-1-6684-9039-6.ch008	https://www.scopus.com/inward/record.uri?eid=2-s2.0-85178601305&doi=10.4018%2f978-1-6684-9039-6.ch008&partnerID=40&md5=eafbded184ecfbca4d52161c51ba5dbf	Several technologies emerged and disrupted how they operate in the Tourism 4.0 environment surrounding tourism companies. One, the digitalization of processes has become a way to support survival, and second, data grows exponentially daily. In this environment, a business intelligence tool can help to improve decision-making while enabling managers to realize complex information quickly and make …			Book chapter	Scopus
77	Kalra S.; Bhogal S.; Aggarwal P.; Singh M.; Bali H.K.	Kalra, Sushil (57233455500); Bhogal, Sachin (57226377601); Aggarwal, Pranav (57216437274); Singh, Manpreet (58073601600); Bali, Harpreet Kaur (58968510100)	57233455500; 57226377601; 57216437274; 58073601600; 58968510100	Management and use of artificial intelligence for recovery in the Indian hospitality and tourism industry during COVID-19	2024	10.1063/5.0177830	https://www.scopus.com/inward/record.uri?eid=2-s2.0-85189368551&doi=10.1063%2f5.0177830&partnerID=40&md5=a4dbe22ac1e7003fd8bcf14079191dfb	The Pandemic (Covid-19) deeply impacted the Hospitality and Tourism industry across the country. Its effect disrupted human lives and pushed the country to an economic slowdown. This Pandemic brought fear of travel and dining out, on every person be it a domestic or an international traveller. Lockdowns and intra state travel ban, and the fear of being quarantined took its toll on Hospitality and…	AI; Automated Machines; COVID 19; Hygiene; ICT; Innovation		Conference paper	Scopus
78	Wang S.	Wang, Shiwei (57846368200)	57846368200	Route Planning of Health Care Tourism Based on Computer Deep Learning	2022	10.1155/2022/4500009	https://www.scopus.com/inward/record.uri?eid=2-s2.0-85136058850&doi=10.1155%2f2022%2f4500009&partnerID=40&md5=9a9e696c82f2c07f0dd9d302bf432cdb	With the continuous improvement of people's living standards, the form of tourism is gradually changing. In the past two years, people's demand for tourism has also changed from traditional ornamental tourism to wellness tourism, which has provided a development opportunity for rural tourism. At the same time, the government has also begun to focus on the development of tourism with rural charact…		Deep learning; Tourism; Agriculture industries; Continuous improvements; Health tourisms; Living standards; Planning and design; Route planning; Rural planning; Rural tourisms; Service industries; Tourism industry; Rural areas	Article	Scopus
79	Lyu H.; Han Z.	Lyu, Haijing (57836835100); Han, Zhenkun (57837345600)	57836835100; 57837345600	Algorithm of Scenic Spot Tourism Route Planning Based on Convolution Neural Network	2022	10.1155/2022/5330611	https://www.scopus.com/inward/record.uri?eid=2-s2.0-85135718144&doi=10.1155%2f2022%2f5330611&partnerID=40&md5=590e23e0d221a1d1e5891acb1bcb4ca6	Based on convolution neural network, a tourism route planning method for scenic spots is proposed. The method of performing primitive trajectory adaptive learning is used to plan and design the tourism route nodes and path space. On this basis, the shortest distribution grid structure model of tourism routes is constructed. Using the visual servo mobile route optimization control method, the cons…		Convolution; Graph theory; Learning systems; Motion planning; Visual servoing; Adaptive learning; Convolution neural network; Distribution grid; Grid structures; Path space; Plan and designs; Planning method; Route planning; Scenic spot; Short-path; Iterative methods	Article	Scopus
80	Chen C.; Wei Z.	Chen, Chen (59049942700); Wei, Zhao (57418306400)	59049942700; 57418306400	Role of Artificial Intelligence in travel decision making and tourism product selling	2024	10.1080/10941665.2024.2317390	https://www.scopus.com/inward/record.uri?eid=2-s2.0-85187526606&doi=10.1080%2f10941665.2024.2317390&partnerID=40&md5=09c9fb13730f1b329e3efc5d846d8348	In this work, data is collected through a questionnaire evaluating factors, such as informativeness from AI, recommendations via AI, social media, customer purchase behavior, learning new strategies, and online tourism marketing influence. The data underwent analysis using the Statistical Package for Social Sciences (SPSS), which allowed us to perform various analysis methods, such as ANOVA analy…	Artificial intelligence; tourism; tourism industry; tourism product selling; travel; travel decision making	artificial intelligence; consumption behavior; decision making; electronic commerce; marketing; social media; tourist behavior; travel behavior	Article	Scopus
81	Ding J.; Wang G.; Chu Y.; Dong T.; Cai Y.; Chen C.	Ding, Jianmin (57328657700); Wang, Guoquan (57328476500); Chu, Yongchao (57328568700); Dong, Tiantian (57538297600); Cai, Yijun (57764663700); Chen, Chang (57328753200)	57328657700; 57328476500; 57328568700; 57538297600; 57764663700; 57328753200	Advantages of BP Neural Network in Sports Tourism Management System	2022	10.1007/978-3-031-05484-6_116	https://www.scopus.com/inward/record.uri?eid=2-s2.0-85132830384&doi=10.1007%2f978-3-031-05484-6_116&partnerID=40&md5=dd53f17c551eeed8728fc1ccba4da6ef	In recent years, as they have improved their living standards, people have traveled more and more. The Ministry of Tourism Information Management is responsible for how to manage information graphics better. Players’managers point to the need to use travel information, such as information on how to understand sights in a timely manner, provide timely and effective information, provide information…	BP neural network; Management system; Sports tourism; Tourism management	Behavioral research; Computer graphics; Decision making; Genetic algorithms; Neural networks; Sports; BP neural networks; Information graphics; Living standards; Manage information; Management IS; Management systems; Real- time; Sports tourisms; Tourism management; Travel information; Information management	Conference paper	Scopus
82	Ashrafuzzaman M.; Era R.R.; Awal S.B.; Sultana I.; Thimmaiah A.; Sharma A.K.; Sharma J.	Ashrafuzzaman, Md. (57205002522); Era, Rabita Rahman (59072850500); Awal, Saira Binte (59073923700); Sultana, Israt (58985796300); Thimmaiah, Arjun (59076604700); Sharma, Amit Kumar (59076074200); Sharma, Jitendra (59074469700)	57205002522; 59072850500; 59073923700; 58985796300; 59076604700; 59076074200; 59074469700	Transforming medical tourism through an integrated business intelligence platform: Data-driven insights and healthcare industry impact	2024	10.4018/979-8-3693-1210-0.ch010	https://www.scopus.com/inward/record.uri?eid=2-s2.0-85192493534&doi=10.4018%2f979-8-3693-1210-0.ch010&partnerID=40&md5=578dcff8ee0606612a5f531ed5d888d9	Medical tourism has evolved significantly, leveraging data-driven insights in its core operations. This chapter explores the impact of analytics, AI, and big data on patient care, destination selection, and industry dynamics. Personalized patient care is enhanced through data integration, tailoring services to individual needs, improving overall experiences, and treatment outcomes. This focuses o…			Book chapter	Scopus
83	Neshat N.; Moayedfar S.; Rezaee K.; Amrollahi Biuki N.	Neshat, Najmeh (36238352300); Moayedfar, Saeedeh (56721362400); Rezaee, Khosro (57216989267); Amrollahi Biuki, Nahid (57250534000)	36238352300; 56721362400; 57216989267; 57250534000	Sustainable planning of developing tourism destinations after COVID-19 outbreak: a deep learning approach	2024	10.1080/19407963.2021.1970578	https://www.scopus.com/inward/record.uri?eid=2-s2.0-85114517290&doi=10.1080%2f19407963.2021.1970578&partnerID=40&md5=ab3f0bf646971c6b2f320a455cc28fe4	Tourist destinations across the globe have been hit by the worst of the crisis that ensued the Covid-19 pandemic, and this concern is exponentially worse in developing countries. Sustainable planning of these countries to face the unheralded crises demands an approach to provide the most efficient solutions using past experiences, unique characteristics of the present crisis, and existing obstacl…	covid-19 pandemic; Deep learning; developing tourism destination; sustainable planning; tourism planning and management		Article	Scopus
84	Ding J.; Weng L.; Fan L.; Liu P.	Ding, Jie (59378185200); Weng, Lingyan (59378407400); Fan, Lili (59377959400); Liu, Peixue (57207222122)	59378185200; 59378407400; 59377959400; 57207222122	Spatial layout optimization model integrating layered attention mechanism in the development of smart tourism management	2024	10.7717/PEERJ-CS.2329	https://www.scopus.com/inward/record.uri?eid=2-s2.0-85207072247&doi=10.7717%2fPEERJ-CS.2329&partnerID=40&md5=0bf61cfa7695d3cc9c8336eee85585ef	Tourism demand projection is paramount for both corporate operations and destination management, facilitating tourists in crafting bespoke, multifaceted itineraries and enriching their vacation experiences. This study proposes a multilayer self attention mechanism recommendation algorithm based on dynamic spatial perception, with the aim of refining the analysis of tourists’ emotional inclination…	Dynamic spatial perception; Multi scenic itineraries; Multi-layer attention mechanism; Spatial layout; Tourism demand forecasting	Deep learning; Tourism; Attention mechanisms; Dynamic spatial; Dynamic spatial perception; Multi scenic itinerary; Multi-layer attention mechanism; Multi-layers; Spatial layout; Spatial perception; Tourism demand; Tourism demand forecasting; Leisure	Article	Scopus
85	Jane O.	Jane, Orpha (59196908200)	59196908200	Strategic entrepreneurship and digital transformation to enhance the tourism performance management	2024	10.1108/978-1-83549-015-020241005	https://www.scopus.com/inward/record.uri?eid=2-s2.0-85197146788&doi=10.1108%2f978-1-83549-015-020241005&partnerID=40&md5=f491ac9df95adeaf598a2af83843949b	This chapter delves into the enhancement of the tourism industry through strategic entrepreneurship (SE) and digital transformation. The potential of these methodologies in revolutionizing tourism development and management is emphasized. The Fourth Industrial Revolution, characterized by technologies such as the Internet of Things, big data, artificial intelligence (AI), cloud computing, augment…	Digital transformation; Fourth Industrial Revolution; Strategic entrepreneurship; Tourism management; Tourism per-formance		Book chapter	Scopus
86	Rong A.; Jianwei S.; Xiaowei X.	Rong, Ai (58237436700); Jianwei, Song (15848305500); Xiaowei, Xie (59222485800)	58237436700; 15848305500; 59222485800	Intelligent entertainment robots based on path navigation planning in tourism intelligent services and user entertainment experience analysis	2025	10.1016/j.entcom.2024.100829	https://www.scopus.com/inward/record.uri?eid=2-s2.0-85198735539&doi=10.1016%2fj.entcom.2024.100829&partnerID=40&md5=28e2d473a0bdb7d75df34add790747c4	With the development of tourism industry, users have higher and higher demand for travel experience, while traditional tourism services can no longer meet the needs of users. Therefore, as an innovative tourism service mode, intelligent entertainment robots have broad application prospects. This paper proposes a design scheme of intelligent entertainment robot based on path navigation planning. B…	Intelligent entertainment robot; Path navigation planning; Tourism intelligent service; User entertainment experience	Behavioral research; Emotion Recognition; Engineering education; Intelligent robots; Machine learning; Motion planning; Navigation; Robot programming; Entertainment robots; Intelligent entertainment robot; Intelligent Services; Navigation planning; Path navigation; Path navigation planning; Tourism intelligent service; Tourism services; Travel experiences; User entertainment experience; Machine d…	Article	Scopus
87	Yu T.; Rita P.; Moro S.; Oliveira C.	Yu, Ting (57349119700); Rita, Paulo (14629383400); Moro, Sérgio (56076679200); Oliveira, Cristina (57195321971)	57349119700; 14629383400; 56076679200; 57195321971	Insights from sentiment analysis to leverage local tourism business in restaurants	2022	10.1108/IJCTHR-02-2021-0037	https://www.scopus.com/inward/record.uri?eid=2-s2.0-85119583291&doi=10.1108%2fIJCTHR-02-2021-0037&partnerID=40&md5=5c131960d3e0e9769343233f46063004	Purpose: Social media has become the main venue for users to express their opinions and feelings, generating a vast number of available and valuable data to be scrutinized by researchers and marketers. This paper aims to extend previous studies analyzing social media reviews through text mining and sentiment analysis to provide useful recommendations for management in the restaurant industry. Des…	Giethoorn; Lexalytics; Online reviews; Restaurant business; Sentiment classification; Social media; Text mining	artificial intelligence; atmosphere; beverage; mining; small scale industry; social media; tourism	Article	Scopus
88	Zhang Z.	Zhang, Zhiyu (59419253200)	59419253200	How Artificial Intelligence Optimizes Customer Relationship Management in the Tourism Industry	2024	10.1109/AICIT62434.2024.10730178	https://www.scopus.com/inward/record.uri?eid=2-s2.0-85209775020&doi=10.1109%2fAICIT62434.2024.10730178&partnerID=40&md5=d60c9abb554189934d802cfedd5f8678	This study focuses on the application of artificial intelligence technology in the field of customer relationship management in the tourism industry and the problems encountered in this application. At the same time, it will propose corresponding solutions and analyze the many challenges currently faced by artificial intelligence technology, covering Data privacy and security issues, the accuracy…	artificial intelligence; big data analysis; blockchain technology; customer relationship management; tourism industry	Leisure industry; Public relations; Sales; Tourism industry; Artificial intelligence technologies; Big data analyze; Block-chain; Blockchain technology; Corresponding solutions; Customer data; Customer relationship management; Data privacy and securities; Privacy issue; Tourism industry; Data accuracy	Conference paper	Scopus
89	Ku E.C.S.; Chen C.-D.	Ku, Edward C.S. (35177646000); Chen, Chun-Der (55568513764)	35177646000; 55568513764	Artificial intelligence innovation of tourism businesses: From satisfied tourists to continued service usage intention	2024	10.1016/j.ijinfomgt.2024.102757	https://www.scopus.com/inward/record.uri?eid=2-s2.0-85183651834&doi=10.1016%2fj.ijinfomgt.2024.102757&partnerID=40&md5=bfc7e95d69e62f57b9947f5f6cdc3033	The study analyzes how tourism businesses satisfy customers through artificial intelligence innovation services. Based on the socio-technical system perspective and emotions, the research framework was proposed and analyzed using the partial least squares (PLS-SEM) approach. By collecting questionnaire data over two years (2022 and 2023 from Beijing, Hangzhou, Taipei, and Singapore) and conductin…	Artificial intelligence; Emotions; Functional benefits; Socio-technical systems; Tourism businesses	Customer satisfaction; Least squares approximations; Tourism; Emotion; Functional benefit; Hangzhou; Partial least-squares; Questionnaire data; Research frameworks; Service usage; Sociotechnical systems; Tourism business; Usage intention; Artificial intelligence	Article	Scopus
90	Wang N.	Wang, Ning (59136419400)	59136419400	Using the Fuzzy Method and Multi-Criteria Decision Making to Analyze the Impact of Digital Economy on Urban Tourism	2024	10.1007/s44196-024-00517-5	https://www.scopus.com/inward/record.uri?eid=2-s2.0-85193698723&doi=10.1007%2fs44196-024-00517-5&partnerID=40&md5=4b413533ab52e6294d8a6fc9d9e94634	Urban tourism promotes the economic growth of a nation around the year through direct and indirect incomes. In recent years, the digital economy has impacted the growth of urban tourism through hassle-free money transactions and expenditures. This article, therefore, introduces a Multi-Criteria Fuzzy-based Decision-Making Method (MCFDMM) for validating the impact of the digital economy impact ove…	Decision-making; Digital economy; Fuzzy; Multi-criteria; Urban tourism	Decision support systems; Deep learning; Economic analysis; Fuzzy systems; Tourism; Urban growth; Condition; Decisions makings; Digital economy; Economic growths; Fuzzy; Fuzzy methods; Multi criteria decision-making; Multi-criteria; Multi-Criterion; Urban tourisms; Decision making	Article	Scopus
91	Nag A.; Mishra S.	Nag, Aditi (57234834100); Mishra, Smriti (58493527200)	57234834100; 58493527200	Revitalizing Mining Heritage Tourism: A Machine Learning Approach to Tourism Management	2024	10.22044/jme.2024.13770.2554	https://www.scopus.com/inward/record.uri?eid=2-s2.0-85203071061&doi=10.22044%2fjme.2024.13770.2554&partnerID=40&md5=ac296f411564d664095237f63719aeec	The convergence of Mining Heritage Tourism (MHT) and Artificial Intelligence (AI) presents a transformative paradigm, reshaping heritage preservation, visitor engagement, and sustainable growth. This paper investigates the dynamic synergy between these realms, probing how AI-driven technologies can augment the authenticity, accessibility, and educational significance of mining heritage sites. Foc…	Artificial intelligence; Cultural sensitivity; Mining heritage tourism; Sustainable development; Visitor engagement		Article	Scopus
92	Wang W.; Wu D.	Wang, Wenlong (57825757600); Wu, Daihanyu (57825757700)	57825757600; 57825757700	Construction of Rural Tourism Brand Value Management Model from the Perspective of Big Data	2022	10.1155/2022/5623782	https://www.scopus.com/inward/record.uri?eid=2-s2.0-85135225775&doi=10.1155%2f2022%2f5623782&partnerID=40&md5=1d546c94947df62d260adf1d3d0dce27	Rural tourism has become an important branch of tourism management. Big data technology provides tools for rural tourism brand value management. This study aims to build a brand value management model for rural tourism from the perspective of big data. The rural tourism brand value management model under the big data perspective takes the rural tourism brand competitiveness as the starting point …		Big Data; Tourism; Competition; Neural networks; Brand values; Competitive advantage; Data technologies; Enterprise values; Indices systems; Management Model; Points-to-analysis; Rural tourisms; Tourism management; Value management; tourism; Big data	Article	Scopus
93	Ercik C.; Kardaş K.	Ercik, Cevat (59334455200); Kardaş, Kerem (59334196800)	59334455200; 59334196800	Reflections of digital technologies on human resources management in the tourism sector	2024	10.1108/WHATT-09-2024-0208	https://www.scopus.com/inward/record.uri?eid=2-s2.0-85204380164&doi=10.1108%2fWHATT-09-2024-0208&partnerID=40&md5=c9a706b3b4b2288813e1f031dc2c9b7c	Purpose: The aim of this study is to examine in detail the impact of technological advancements on the workforce within the tourism industry. Specifically, it seeks to understand the effects of information and communication technologies (ICT), social media, the internet and websites, mobile technologies and other technological developments on workforce dynamics, skill requirements and job descrip…	Information and communication technology (ICT); Technological innovations; Tourism; Tourism industry		Article	Scopus
94	Qi H.; Han Z.	Qi, Haixia (56486761500); Han, Zhifei (58924937200)	56486761500; 58924937200	Emotion Recognition and Management in the Tourism Industry during Emergency Events Using Improved Convolutional Neural Network	2024	10.1109/ACCESS.2024.3370431	https://www.scopus.com/inward/record.uri?eid=2-s2.0-85187012710&doi=10.1109%2fACCESS.2024.3370431&partnerID=40&md5=a9fd9f3c451428ea0cc6f713a0944ce5	The purpose is to optimize emotion recognition capabilities in the tourism industry during emergency events and enhance management efficiency. Hence, based on the principles of emergency events and emotion recognition, this work has outlined the fundamental emotion recognition process. Additionally, an emotion recognition model is constructed based on a Convolutional Neural Network (CNN), and the…	attention mechanism; Convolutional neural network; emergency events; emotion recognition management; tourism industry	Convolution; Efficiency; Emergency services; Emotion Recognition; Feature extraction; Neural networks; Speech recognition; Attention mechanisms; Brain modeling; Convolutional neural network; Emergency events; Emotion recognition; Emotion recognition management; Features extraction; Solid modelling; Three-dimensional display; Tourism industry; Three dimensional displays	Article	Scopus
95	Wu Y.; Zuo L.; Kalmanbetova G.	Wu, Yujuan (56435104900); Zuo, Lei (59328868400); Kalmanbetova, Gulzat (57803458000)	56435104900; 59328868400; 57803458000	Research on Carrying Capacity and Resource Management of Tourism Destinations Combined with Machine Learning	2023	10.1145/3648050.3648082	https://www.scopus.com/inward/record.uri?eid=2-s2.0-85204078245&doi=10.1145%2f3648050.3648082&partnerID=40&md5=a078542e6a61187fa429df9ebd600b8a	Tourism is an important engine of economic development all over the world. However, the sustainability and resource management of tourist destinations have always been a concern. The purpose of this study is to explore how to combine machine learning(ML) technology to improve the carrying capacity and resource management of tourist destinations in order to improve their competitiveness and sustai…	Carrying Capacity; Machine Learning; Resource Management; Tourism Destinations	Resource allocation; Tourism; Capacity management; Carrying capacity; Economic development; Machine learning algorithms; Machine learning technology; Machine-learning; Resource management; Sustainability managements; Tourism destination; Tourist destinations; Leisure	Conference paper	Scopus
96	Ashqar R.I.; Ashqar H.I.; Ramos C.M.Q.	Ashqar, Rashed Isam (57300820300); Ashqar, Huthaifa I. (57195937213); Ramos, Célia M. Q. (35073165500)	57300820300; 57195937213; 35073165500	Identity and Access Management in Tourism and Hospitality	2024	10.1007/978-3-031-44131-8_32	https://www.scopus.com/inward/record.uri?eid=2-s2.0-85181976218&doi=10.1007%2f978-3-031-44131-8_32&partnerID=40&md5=d17593aa36e05292947e743458075e3e	Identity and Access Management (IAM) systems are essential for managing access to digital resources in the tourism and hospitality industry. This paper intends to present a holistic review of Identity and Access Management in general and explore the recent techniques used in Tourism and Hospitality. Also, we inferred the challenges of using IAM techniques used in Tourism and Hospitality. Moreover…	Cloud Computing; Data Security; Digital Identity; Hospitality; Identity and Access Management; Tourism; User Behavior Analytics	Artificial intelligence; Behavioral research; Cloud computing; Cryptography; Electronic document identification systems; Cloud-computing; Digital identity; Hospitality; Identity and access managements; Management systems; Management techniques; Multi-factor authentication; Tourism and hospitality industries; User behavior analytic; User behaviors; Authentication	Conference paper	Scopus
97	Li J.	Li, Jiaxin (58139091800)	58139091800	Research on Intelligent Tourism Marketing Management System Based on Mobile end of Computer Artificial Intelligence	2024	10.1109/SSAIC61213.2024.00101	https://www.scopus.com/inward/record.uri?eid=2-s2.0-85200795675&doi=10.1109%2fSSAIC61213.2024.00101&partnerID=40&md5=b169401860bbce4741b7bfdd1eed1bf3	The technical route of this study starts from the background of smart tourism. Then the theory of tourism intelligent marketing management system is constructed based on the process of information system construction. The overall framework structure of the system 113N closed loop is constructed. Then this paper designs the intelligent function module of the system. According to the database deman…	artificial intelligence; Computer; smart tourism; tourism marketing management system	Artificial intelligence; Commerce; Computer terminals; Marketing; Mobile telecommunication systems; Tourism; Closed-loop; Framework structures; Intelligent function modules; Marketing management systems; Mobile terminal; Smart tourism; System construction; Technical route; Tourism marketing management system; Tourism marketings; Information management	Conference paper	Scopus
98	Sánchez-Franco M.J.; Rey-Tienda S.	Sánchez-Franco, Manuel J. (8409457400); Rey-Tienda, Sierra (58490375200)	8409457400; 58490375200	The role of user-generated content in tourism decision-making: an exemplary study of Andalusia, Spain	2024	10.1108/MD-06-2023-0966	https://www.scopus.com/inward/record.uri?eid=2-s2.0-85178399408&doi=10.1108%2fMD-06-2023-0966&partnerID=40&md5=58dd211aeb0f047176d9b0417819945c	Purpose: This research proposes to organise and distil this massive amount of data, making it easier to understand. Using data mining, machine learning techniques and visual approaches, researchers and managers can extract valuable insights (on guests' preferences) and convert them into strategic thinking based on exploration and predictive analysis. Consequently, this research aims to assist hot…	Andalusia; Data visualising techniques; Hotel; Natural language processing; Topic modelling		Article	Scopus
99	Hao Y.; Zheng L.	Hao, Yingcheng (58288186600); Zheng, Lili (58288239700)	58288186600; 58288239700	Application of slam method in big data rural tourism management in dynamic scene	2023	10.1007/s00500-023-08521-1	https://www.scopus.com/inward/record.uri?eid=2-s2.0-85160866415&doi=10.1007%2fs00500-023-08521-1&partnerID=40&md5=03e6657dcd5bf8cda62880f340f845f8	Under the background of the rapid development of science and technology, technologies in many fields are advancing accordingly. The same artificial intelligence and computer vision technologies are also constantly being updated. Similarly, in vision On the basis of, positioning and mapping (technology is the core technology for mobile robots to complete the intelligentization) has also had a grea…	Big data; Computer vision; Dynamic scene; Visual features	Big data; Computer vision; Nonlinear programming; Computer vision technology; Core technology; Depth camera; Development of science and technologies; Dynamic scenes; Intelligentization; Rural tourisms; Tourism management; Visual feature; Visual SLAM; Cameras	Article	Scopus
100	Ansari N.; Tyagi S.; Mehrwal N.; Rastogi N.; Chibber S.; Memoria M.; Kumar R.; Gupta A.	Ansari, Nabila (57809264900); Tyagi, Shagun (57808981200); Mehrwal, Namrata (57878969000); Rastogi, Neha (57878654300); Chibber, Sanyukta (57878813000); Memoria, Minakshi (57218936166); Kumar, Rajiv (57214462148); Gupta, Ashulekha (57218391146)	57809264900; 57808981200; 57878969000; 57878654300; 57878813000; 57218936166; 57214462148; 57218391146	A Critical Insight into the Impact of Technology in Transformation of Tourist Business into Smart Tourism	2022	10.1109/COM-IT-CON54601.2022.9850779	https://www.scopus.com/inward/record.uri?eid=2-s2.0-85137522804&doi=10.1109%2fCOM-IT-CON54601.2022.9850779&partnerID=40&md5=9de5f4b0a8e38ad876fa8df432529c4c	Due to digital technologies, tourism organizations are discovering new ways to create new business models. Artificial intelligence (AI) is used by tourism businesses to save money on operations and maintenance. Tourist pleasure can be increased by adapting a variety of activities and experiences to the preferences of individual visitors. The use of big data allows tourism professionals to obtain …	AI; Blockchain; ICT; Smart Tourism; Tourist Satisfaction	Blockchain; Competition; Tourism; Block-chain; Consumer value; Digital technologies; ICT; New business models; Operating strategy; Operations and maintenance; Smart tourism; Tourist satisfaction; Value proposition; Artificial intelligence	Conference paper	Scopus
101	Wang S.; Yu Z.	Wang, Shan (58427763600); Yu, Zhenzhen (58261200900)	58427763600; 58261200900	Research on Tourism Management Decision Support System Based on IOT Technology	2021	10.1109/TOCS53301.2021.9688897	https://www.scopus.com/inward/record.uri?eid=2-s2.0-85125064914&doi=10.1109%2fTOCS53301.2021.9688897&partnerID=40&md5=b246781e52f43152031e5f7465ff7dc1	With the continuous popularization of information technology, human life has also formed a new social model centered on IOT technology and intelligence. Tourism is an extension of human life style, and every step of its information technology has a certain impact on the service level and quality of tourism. Tourism is the core of modern tourism development, and the IOT has a wide application pros…	IOT; tourism management	Artificial intelligence; Internet of things; Tourism; Continuous development; Human lives; IOT; Life styles; Management decisions; Service levels; Service Quality; Social models; Tourism development; Tourism management; Decision support systems	Conference paper	Scopus
102	Meng Y.; Pu J.; Chen W.	Meng, Yue (57214930976); Pu, Jing (57208693315); Chen, Wenkuan (56092820700)	57214930976; 57208693315; 56092820700	Design and Implementation of Tourism Information Management System Based on.NET	2021	10.1007/978-3-030-62746-1_41	https://www.scopus.com/inward/record.uri?eid=2-s2.0-85097091941&doi=10.1007%2f978-3-030-62746-1_41&partnerID=40&md5=a383222cb35ebd5a6fcfdec846e011be	This article relates to the operation mode of the tourism industry to complete the development mode to carry out the design operation. The intention is to use the synergy between many software technologies and corporate market departments to assist the tourism industry in the implementation of many related departments and other affairs to achieve better work efficiency and facilitate high-level i…	.NET; Design and implementation; Information flow; Tourism information management	Advanced Analytics; Big data; Internet of things; Leisure industry; Machine learning; Privacy by design; Software engineering; Tourism; Well testing; Design and implementations; Functional compositions; Implementation effects; Implementation process; Information management systems; Investigation and analysis; Requirement analysis; System implementation; Information management	Conference paper	Scopus
103	Klimova T.B.; Bogomazova I.V.; Anoprieva E.V.; Semchenko I.V.; Plokhikh R.V.	Klimova, Tatyana B. (56358519400); Bogomazova, Irina V. (56358996500); Anoprieva, Ekaterina V. (57211790540); Semchenko, Irina V. (57195276419); Plokhikh, Roman V. (57205339295)	56358519400; 56358996500; 57211790540; 57195276419; 57205339295	Digital supply chain management in the tourism and hospitality industry: Trends and prospects	2020		https://www.scopus.com/inward/record.uri?eid=2-s2.0-85087749498&partnerID=40&md5=d3933e5abc635c444aa6c759ac82c513	The article discusses the basics of the digital supply chain management, its characteristic features and scope of application are covered. The analysis of a condition of development of digital supply chain management in the world reflecting growth of its share in gross domestic product, and the Russian Federation for which characteristic is the state initiative of advance and development of digit…	Concept 4.0.; Digital economy; Hospitality; Modern technologies; Supply chain management; Tourism		Article	Scopus
104	Simonova I.	Simonova, Ivana (37662233100)	37662233100	Blended learning as a mover in the tourism&management study programme?	2017	10.1007/978-3-319-59360-9_11	https://www.scopus.com/inward/record.uri?eid=2-s2.0-85020454540&doi=10.1007%2f978-3-319-59360-9_11&partnerID=40&md5=8450006b3953a5eabbb4a56633863761	The article deals with the bachelor Tourism&Management study programme taught at the Faculty of Informatics and Management, University of Hradec Kralove, Czech Republic. Reflecting various reasons and changing accreditation criteria, the level of students’ knowledge of English was decreasing within 25 academic years. So as to reach the original level as a minimum, the blended learning design was …	Blended learning; English; Foreign languages; Management; Study programme; Tourism	Artificial intelligence; Computer science; Computers; Management; Blended learning; English; Foreign language; Study programme; Tourism; Teaching	Conference paper	Scopus
105	Pasichnyk V.; Artemenko O.	Pasichnyk, Volodymyr (24483963200); Artemenko, Olga (57213288434)	24483963200; 57213288434	Intelligent advisory systems and information technology support for decision making in tourism	2015	10.1109/STC-CSIT.2015.7325421	https://www.scopus.com/inward/record.uri?eid=2-s2.0-84969921690&doi=10.1109%2fSTC-CSIT.2015.7325421&partnerID=40&md5=cb99021a8256c193178eef13f6c08d08	In this paper the analysis of researches and developments of information technologies for decision support and analysis in the field of tourism was done. The decision-making technologies were classified for different members of the tourism market. The modern tendencies and development directions of decision support technologies were analysed for tourists of different marketing categories. The nee…	advisory systems; data mining; decision support systems; expert systems; tourism	Artificial intelligence; Commerce; Data fusion; Decision making; Decision support systems; Expert systems; Advisory systems; Decision making in tourisms; Decision supports; Development directions; Information technology tools; Making technology; Modern technologies; tourism; Data mining	Conference paper	Scopus
106	Abeysinghe S.; Manchanayake I.; Samarajeewa C.; Rathnayaka P.; Walpola M.J.; Nawaratne R.; Bandaragoda T.; Alahakoon D.	Abeysinghe, Supun (57206894598); Manchanayake, Isura (57206901023); Samarajeewa, Chamod (57206898891); Rathnayaka, Prabod (56716519300); Walpola, Malaka J. (23010385200); Nawaratne, Rashmika (57201680730); Bandaragoda, Tharindu (56717659400); Alahakoon, Damminda (6602546111)	57206894598; 57206901023; 57206898891; 56716519300; 23010385200; 57201680730; 56717659400; 6602546111	Enhancing decision making capacity in tourism domain using social media analytics	2018	10.1109/ICTER.8615462	https://www.scopus.com/inward/record.uri?eid=2-s2.0-85062057526&doi=10.1109%2fICTER.8615462&partnerID=40&md5=bb4e58710a500515d14dc1260e3f65f2	Social media has gained an immense popularity over the last decade. People tend to express opinions about their daily encounters on social media freely. These daily encounters include the places they travelled, hotels or restaurants they have tried and aspects related to tourism in general. Since people usually express their true experiences on social media, the expressed opinions contain valuabl…	Insights; Machine learning; Social media; Tourism	Behavioral research; Decision making; Social networking (online); Business value; Decision-making process; Decisions makings; Insight; Large volumes; Machine learning techniques; Machine-learning; Social media; Social media analytics; Visualization tools; Machine learning	Conference paper	Scopus
107	Tan W.-J.; Yang C.-F.; Château P.-A.; Lee M.-T.; Chang Y.-C.	Tan, Wen-Jui (57200083131); Yang, Chen-Feng (56716910500); Château, Pierre-Alexandre (55262415300); Lee, Meng-Tsung (8843341700); Chang, Yang-Chi (8075492100)	57200083131; 56716910500; 55262415300; 8843341700; 8075492100	Integrated coastal-zone management for sustainable tourism using a decision support system based on system dynamics: A case study of Cijin, Kaohsiung, Taiwan	2018	10.1016/j.ocecoaman.2017.12.012	https://www.scopus.com/inward/record.uri?eid=2-s2.0-85039161553&doi=10.1016%2fj.ocecoaman.2017.12.012&partnerID=40&md5=41bcff43ee54ca04dc2003563b7cb31d	Kaohsiung is the largest port city in Taiwan, where the offshore island of Cijin forms a natural breakwater for the Kaohsiung harbor. With its abundant recreational resources and convenient accessibility, the small island of Cijin attracts many tourists during weekends. Although the highly developed tourism has led to significant economic benefits, it has also caused pollution and unbalanced deve…	Decision support system (DSS); Driving forces, states, and response (DSR) indicators; Integrated coastal zone management (ICZM); Sustainable development indicator; System dynamics (SD)	Cijin Island; Kaohsiung; Taiwan; Artificial intelligence; Breakwaters; Coastal engineering; Coastal zones; Decision making; Ecosystems; Marine pollution; Planning; Ports and harbors; Regional planning; Sustainable development; System theory; Decision support system (dss); Driving forces; Integrated coastal zone management; Sustainable development indicators; System Dynamics; accessibility; breakw…	Article	Scopus
108	Wei C.; Wang Q.; Liu C.	Wei, Cao (57219898227); Wang, Qinan (57219898801); Liu, Chengying (57219900080)	57219898227; 57219898801; 57219900080	Application of an artificial neural network optimization model in e-commerce platform based on tourism management	2021	10.1186/s13638-021-01947-x	https://www.scopus.com/inward/record.uri?eid=2-s2.0-85104463677&doi=10.1186%2fs13638-021-01947-x&partnerID=40&md5=7b25a480640a90f374b5ec268fd5b8a5	The advantages of e-commerce and information technology play an extremely important role in enhancing the competitiveness of the tourism industry and adapting to the needs of global economic integration. The development of e-commerce has played a huge role in all walks of life. For the tourism industry, the role of e-commerce is even more important. This article analyzes the influence of e-commer…	Artificial neural network; Competitive factors; Tourism market; Tourism resources	Competition; Electronic commerce; Leisure industry; Neural networks; Structural optimization; Domestic tourisms; Global economics; Industrial structures; Neural network model; Neural network optimization; Production factors; Tourism development; Tourism management; Tourism	Article	Scopus
109	Qu Z.	Qu, Ziwen (57217728932)	57217728932	Construction of Tourism Planning Information System Based on Ant Colony Algorithm	2020	10.1088/1742-6596/1533/2/022101	https://www.scopus.com/inward/record.uri?eid=2-s2.0-85087547614&doi=10.1088%2f1742-6596%2f1533%2f2%2f022101&partnerID=40&md5=4f3675a3e0ad7c2d93005f6c7dfd41e6	Tourism planning is a vital link in tourism. Compared with the traditional tourism planning based on experience, it is more scientific and reasonable to formulate through mathematical modeling methods. This paper mainly studies the construction of tourism planning information system based on ant colony(AC) algorithm. In the solution process, for the problems with more attractions, you need to div…	Ant Colony Algorithm; System Construction; Tourism Planning; Tourism Planning Information System	Artificial intelligence; Information systems; Information use; Tourism; Ant colony algorithms; Reference values; Round-trip time; Route planning; Solution process; Specific problems; System construction; Tourism planning; Ant colony optimization	Conference paper	Scopus
110	Ding X.; Shi P.; Li X.; Gong L.	Ding, Xiaonan (57205119981); Shi, Pengfei (57203286879); Li, Xingming (57203287523); Gong, Lina (57205119585)	57205119981; 57203286879; 57203287523; 57205119585	Promoting Effect of Artificial Intelligence Expert Decision-making Technology in Tourism Management Mechanism	2018		https://www.scopus.com/inward/record.uri?eid=2-s2.0-85058631408&partnerID=40&md5=e67c6417f96fe4c213b66bc2150f648a	With the globalization of the international economy, tourism has become more prosperous. Therefore, the management requirements for tourism have also increased tourism management. The next-level discipline has a huge potential for development and development. In the past during the planned journey, people may consult the travel agency in person. If they plan to travel with a lot of experience, th…	Artificial Intelligence; Decision-making Technology; Tourism Management	Algorithms; Artificial Intelligence; Decision Making; Development; International; Management; Specifications; Technology; Air transportation; Artificial intelligence; Behavioral research; Biometric technology; Conversion rates; International economy; Making technology; Personalized products; Promoting effect; Tourism management; Travel agency; Decision making	Article	Scopus
111	Razali M.N.; Moung E.G.; Yahya F.; Hou C.J.; Hanapi R.; Mohamed R.; Hashem I.A.T.	Razali, Mohd Norhisham (57219099651); Moung, Ervin Gubin (36548768300); Yahya, Farashazillah (57211423421); Hou, Chong Joon (57235525000); Hanapi, Rozita (37041114400); Mohamed, Raihani (57193722837); Hashem, Ibrahim Abakr Targio (57281876300)	57219099651; 36548768300; 57211423421; 57235525000; 37041114400; 57193722837; 57281876300	Indigenous food recognition model based on various convolutional neural network architectures for gastronomic tourism business analytics	2021	10.3390/info12080322	https://www.scopus.com/inward/record.uri?eid=2-s2.0-85113717429&doi=10.3390%2finfo12080322&partnerID=40&md5=985851116d7df89078e16788b4a98003	In gastronomic tourism, food is viewed as the central tourist attraction. Specifically, indigenous food is known to represent the expression of local culture and identity. To promote gastronomic tourism, it is critical to have a model for the food business analytics system. This research undertakes an empirical evaluation of recent transfer learning models for deep learning feature extraction for…	CNN; Deep learning; Food features; Food recognition; Food sentiment; Gastronomic tourism; Transfer learning	Advanced Analytics; Classification (of information); Convolution; Deep learning; Leisure industry; Network architecture; Silicon compounds; Tourism; Transfer learning; Business analytics; Classification accuracy; Computational speed; Empirical evaluations; Feature representation; Performance drawback; Tourist attractions; Web application systems; Convolutional neural networks	Article	Scopus
112	Meng Y.; Pu J.; Chen W.	Meng, Yue (57214930976); Pu, Jing (57208693315); Chen, Wenkuan (56092820700)	57214930976; 57208693315; 56092820700	Design and Implementation of Self-service Tourism Management Information System Based on B/S Architecture	2021	10.1007/978-3-030-62746-1_11	https://www.scopus.com/inward/record.uri?eid=2-s2.0-85097078529&doi=10.1007%2f978-3-030-62746-1_11&partnerID=40&md5=541c9f253b046acb5f7d55de1a64eede	Tourism informationization is a trend in today’s society. Tourists are no longer satisfied with traveling with tourist groups, but hope to experience their own journey in the form of self-help. Aiming at this demand, this paper develops a self-service tourism management information system based on the B/S structure, using object-oriented analysis and design. Through the self-service tourism manag…	B/S architecture; Information system; Self-help tourism	Advanced Analytics; Big data; Computer architecture; Information use; Internet of things; Machine learning; Management information systems; Object oriented programming; Privacy by design; Tourism; B/S architecture; B/S structure; Design and implementations; Informationization; Management level; Object oriented analysis and design; Tourism management; Information management	Conference paper	Scopus
113	Hou T.	Hou, Tianchen (57438095400)	57438095400	Research on Management Efficiency and Dynamic Relationship in Intelligent Management of Tourism Engineering Based on Industry 4.0	2022	10.1155/2022/5831062	https://www.scopus.com/inward/record.uri?eid=2-s2.0-85123963533&doi=10.1155%2f2022%2f5831062&partnerID=40&md5=1fef75a7f60701dbccefe98b64313b30	The digital age of artificial intelligence marks the rapid development of tourism engineering and the gradual improvement of intelligent management theory. This study aims to solve the problems of low efficiency of dynamic relationship analysis and low data utilization in traditional intelligent management methods of tourism engineering. This work studies the dynamic optimization model of tourism…		Algorithms; Artificial Intelligence; Humans; Intelligence; Neural Networks, Computer; Tourism; Behavioral research; Convolutional neural networks; Data handling; Efficiency; Industry 4.0; Information management; Optimization; Topology; Convolution neural network; Convolutional neural network; Data analysis models; Dynamic data; Engineering management; Intelligent management; Management data; Mana…	Article	Scopus
114	Sifolo P.P.S.; Henama U.S.	Sifolo, Portia P. S. (56916188500); Henama, Unathi S. (56916142800)	56916188500; 56916142800	Sustainable Supply Chain Management Practices in the Hospitality and Tourism Sector in Africa	2021	10.1007/978-3-030-70171-0_8	https://www.scopus.com/inward/record.uri?eid=2-s2.0-85125500610&doi=10.1007%2f978-3-030-70171-0_8&partnerID=40&md5=96bbc58a2b8960724cdabcaa8a3ad1e6	New frontiers facing the Hospitality and Tourism Services are dynamic and complex because of the involvement of customers and multiple other stakeholders. Moreover, the rapid developments caused by the Fourth Industrial Revolution (4IR), which includes the emergence of new technologies, the increased use of information and communication technology (ICT), social media, robotics, artificial intelli…	Airbnb; Disruption; Hospitality and tourism; Supply chain management sharing economy; Tourism supply chain		Book chapter	Scopus
115	Savvopoulos A.; Kalogeras G.; Mariotti A.; Bernini C.; Alexakos C.; Kalogeras A.	Savvopoulos, Alkiviadis (57204458778); Kalogeras, George (57202968997); Mariotti, Alessia (15731443200); Bernini, Cristina (24824156100); Alexakos, Christos (13607049800); Kalogeras, Athanasios (6603164490)	57204458778; 57202968997; 15731443200; 24824156100; 13607049800; 6603164490	Data analytics supporting decision making in the tourism sector	2019	10.1109/SA47457.2019.8938051	https://www.scopus.com/inward/record.uri?eid=2-s2.0-85079357861&doi=10.1109%2fSA47457.2019.8938051&partnerID=40&md5=9e595a9fadabccd4f41d1fab30771d54	Tourism represents an important industry for many areas in the world contributing significantly to Gross Domestic Product. Yet, it is also quite volatile having to cope with changes in demand and tourist behavior, new emerging markets and socio-economic crises. Improving the innovation capability of the tourist sector is a path towards empowering the industry and making it less susceptible to cha…	Data Analytics; Decision Support Systems; Tourism Innovation	Artificial intelligence; Data Analytics; Decision making; Tourism; Emerging markets; Gross domestic products; Innovation capability; Innovation capacity; Socio-economics; Tourism sectors; Tourist behavior; Tourist destinations; Decision support systems	Conference paper	Scopus
116	Shi Y.; Liu Z.; Chen L.; Li W.	Shi, Yongqiang (57208151713); Liu, Zheng (57208144306); Chen, Li (57214203054); Li, Wei (57213858860)	57208151713; 57208144306; 57214203054; 57213858860	Research on intelligent tourism management based on wireless network development	2019	10.3233/JIFS-179186	https://www.scopus.com/inward/record.uri?eid=2-s2.0-85075863312&doi=10.3233%2fJIFS-179186&partnerID=40&md5=5c6526a665b8ca90c92a7f03b86c7069	With the development of China's Internet, wireless network technology has been upgraded, and the rapid development of wireless network technology requires more advanced intelligent information processing technology to match. Therefore, based on the development of wireless network, this paper proposes intelligent tourism Management scheme. Firstly, the Wide Deep Learning exploratory tourism route …	intelligent tourism; recommendation; tour route; Wireless network	Deep learning; Semantics; Vector spaces; Wireless networks; Intelligent information processing; intelligent tourism; Model and algorithms; recommendation; Recommendation algorithms; Recommended systems; tour route; Wireless network technologies; Research and development management	Article	Scopus
117	Qian W.; Ge Y.	Qian, Wei (57223031744); Ge, Yuemeng (57216752814)	57223031744; 57216752814	The implementation of leisure tourism enterprise management system based on deep learning	2021	10.1007/s13198-021-01103-0	https://www.scopus.com/inward/record.uri?eid=2-s2.0-85104552260&doi=10.1007%2fs13198-021-01103-0&partnerID=40&md5=525aa538d9be80ad4347127aead67131	The foremost part of the leisure tourism enterprise management system is evaluated and studied to explore the financial risk of leisure tourism enterprise and find the loopholes in enterprise risk management. First, the current financial risk management of tourism enterprises is evaluated, using the solvency of corporate finance, capital structure, operating efficiency, and profitability as index…	BP neural network; Business finance; Enterprise management system; Leisure tourism enterprises; Risk management	Backpropagation; Deep learning; Efficiency; Finance; Learning systems; Leisure; Neural networks; Risk management; Back-propagation neural networks; Corporate finance; Enterprise management system; Enterprise risk management; Financial risk management; Financial security; Operating efficiency; Risk management systems; Tourism	Article	Scopus
118	Ding M.	Ding, Maobin (57410824800)	57410824800	Research on Tourism Route Planning Based on Artificial Intelligence Technology	2021	10.1155/2021/2227798	https://www.scopus.com/inward/record.uri?eid=2-s2.0-85122752277&doi=10.1155%2f2021%2f2227798&partnerID=40&md5=fe4b9404bf11372823b46f0808ed176a	Study on designing reasonable travel routes with the least time cost and the highest experience index was conducted. An artificial intelligence-based wireless sensor travel route planning study is proposed. First, the improved TSP route planning model is built at the least time consumption and combines the normal distributed random number (ND) with the genetic algorithm (GA) and proposes the ND-G…		Artificial intelligence; Energy utilization; Face recognition; Sensitivity analysis; Sensor nodes; Applications of AI; Artificial intelligence technologies; Planning models; Planning studies; Route planning; Time cost; Travel route planning; Travel routes; Wireless sensor; Wireless sensor technology; Genetic algorithms	Article	Scopus
119	Cui B.; Sun X.; Chen Y.	Cui, Baojian (57220156835); Sun, Xiaochun (57220156768); Chen, Yuhong (57220167805)	57220156835; 57220156768; 57220167805	Design and Implementation of Tourism Management System Based on SSH	2021	10.1007/978-3-030-62746-1_133	https://www.scopus.com/inward/record.uri?eid=2-s2.0-85097088963&doi=10.1007%2f978-3-030-62746-1_133&partnerID=40&md5=0aa7a54a76d09e7eb549597294b60b53	With the improvement of people’s living standards, traveling has become a common way of leisure. Tourism has gradually become the mainstay of China’s tertiary industry. The amount of daily work information on travel agencies has increased, which brings a certain difficulty to the management of the tourism industry. The combination of tourism and its technology is regarded as a shortcut to success…	SSH framework; Tourism management system	Advanced Analytics; Big data; Internet of things; Machine learning; Privacy by design; Software design; Tourism; Application systems; Design and implementations; Development technology; Integration frameworks; Monotonous functions; Software industry; Tertiary industries; Tourism management; Leisure industry	Conference paper	Scopus
120	Obogo J.U.; Adedoyin F.F.	Obogo, Johnson Uke (57429418700); Adedoyin, Festus Fatai (57212759783)	57429418700; 57212759783	Data-Driven Business Analytics for the Tourism Industry in the UK: A Machine Learning Experiment Post-COVID	2021	10.1109/CBI52690.2021.10058	https://www.scopus.com/inward/record.uri?eid=2-s2.0-85123578206&doi=10.1109%2fCBI52690.2021.10058&partnerID=40&md5=e340f064aa8354f8e3466e84af216d07	The use of data-driven business analytic models has had a significant impact on several sectors of the economy. In the UK, the tourism industry has contributed significantly to the economy. The contribution of tourism to the UK economy is estimated to be £145.9 billion (7.2%) of UK GDP. Regardless of its economic value, tourism is also one of the most vulnerable sectors, as it is susceptible to n…	COVID-19; data-driven business analytics; machine learning; tourism businesses	Binary alloys; Industrial economics; Learning algorithms; Machine learning; Analytic modeling; Business analytics; COVID-19; Data driven; Data-driven business analytic; Economic values; Machine-learning; Tourism business; Tourism industry; UK economy; Disasters	Conference paper	Scopus
121	Smirnov A.; Kashevnik A.; Shilov N.; Mikhailov S.; Gusikhin O.; Martinez H.	Smirnov, Alexander (55725403900); Kashevnik, Alexey (16646119200); Shilov, Nikolay (55932123000); Mikhailov, Sergei (56719229300); Gusikhin, Oleg (23004360400); Martinez, Harry (57209611767)	55725403900; 16646119200; 55932123000; 56719229300; 23004360400; 57209611767	Intelligent content management system for tourism smart mobility: Approach and cloud-based android application	2019	10.5220/0007715304260433	https://www.scopus.com/inward/record.uri?eid=2-s2.0-85067561355&doi=10.5220%2f0007715304260433&partnerID=40&md5=1e36666eca1eb209f48a0da45a350041	Intelligent content management systems have become more popular over the last few years in the tourism industry due to the significantly increasing impact on revenue. Such systems are the part of the smart mobility concept. Smart mobility allows tourists to become more comfortable with transportation in an unknown city by providing interesting information about places seen during their trip. Trad…	Artificial Intelligence; Connected Vehicle; Recommendations; Smart Mobility; Smart Vehicle; Tourism	Android (operating system); Artificial intelligence; Infrastructure as a service (IaaS); Intelligent systems; Intelligent vehicle highway systems; Leisure industry; Tourism; Android applications; Content management system; Interesting information; Internet connection; Recommendations; Smart vehicles; Smart-phone applications; Vehicle infotainment; Vehicles	Conference paper	Scopus
122	Huseynova N.F.	Huseynova, Nigar F. (57204430666)	57204430666	Decision Making on Tourism by Using Natural Language Processing	2022	10.1007/978-3-030-92127-9_98	https://www.scopus.com/inward/record.uri?eid=2-s2.0-85123320242&doi=10.1007%2f978-3-030-92127-9_98&partnerID=40&md5=1df684d4c6793e3ef63b35e0d3f45dfd	The paper deals with measuring the effectiveness of Natural Language in decision-making to have comprehensive results. It’s more convenient for people to comprehend the meaning of linguistic terms rather than quantitative data. A lot of studies have shown that people don’t understand or they are reluctant to act upon numerical data. We surveyed people presenting two different types of information…	Decision making under uncertainty; Deep learning; Fuzzy If-Then rules; Fuzzy Inference Systems; Natural Language Generation; Natural Language Processing		Conference paper	Scopus
123	Zhang H.	Zhang, Hongna (57222350071)	57222350071	Exploration and Analysis of Tourism Marketing Management Innovation Based on Big Data	2021	10.1088/1742-6596/1744/3/032086	https://www.scopus.com/inward/record.uri?eid=2-s2.0-85102402948&doi=10.1088%2f1742-6596%2f1744%2f3%2f032086&partnerID=40&md5=4dd11b6391c7e7a7acdab50750d4b74a	In the era of big data, China's tourism industry has entered a new stage of popularization and industrialization. Tourism mode has changed from "scenic spot tourism"to "whole city tourism". The new generation of information technology promotes the transformation of traditional tourism to intelligent tourism, such as big data, Internet of Things, artificial intelligence, block chain, etc. Tourism …	Big Data; Innovation; Service Marketing; Tourism Marketing Management	Artificial intelligence; Big data; Commerce; Marketing; Metadata; Service industry; Tourism; City tourisms; Existing problems; Paper analysis; Present stage; Service characteristics; Tourism management; Tourism marketings; Traditional manufacturing; Leisure industry	Conference paper	Scopus
124	Wang Y.	Wang, Yu (58393251500)	58393251500	Traffic Forecasting and Decision-making of Investment and Construction of Tourism Highway under the Background of Artificial Intelligence	2020	10.1109/ICOSEC49089.2020.9215286	https://www.scopus.com/inward/record.uri?eid=2-s2.0-85094186941&doi=10.1109%2fICOSEC49089.2020.9215286&partnerID=40&md5=2cbad7e2c404f59f405cb32ddc43f9ea	Passenger traffic forecasting and decision-making of investment and construction of the tourism highway under the background of artificial intelligence is studied in this paper. As an important information asset, big data is expected to provide people with comprehensive, accurate, and real-Time business insights and decision guidance. The value of big data lies in its decision-making usefulness, …	Artificial Intelligence; Decision-making; Tourism Highway; Traffic Forecasting	Behavioral research; Big data; Decision making; Decision support systems; Forecasting; Predictive analytics; Tourism; Traffic surveys; Decision guidance; Decision supports; Information assets; Passenger traffic; Past and present; Prediction model; Real-time business; Traffic Forecasting; Artificial intelligence	Conference paper	Scopus
125	Starosta K.; Budz S.; Krutwig M.	Starosta, Kejo (57202466561); Budz, Sonia (57202463152); Krutwig, Michael (57202516314)	57202466561; 57202463152; 57202516314	Artificial neural-network-based emotion classification in the online media for tourism businesses	2018		https://www.scopus.com/inward/record.uri?eid=2-s2.0-85064600400&partnerID=40&md5=9e60060002f7b97f75e0f9a5abad65bc	Online media is the most important opinion-former today. Opinions and feelings about a location are the most important factors for travelers to make a travel decision in its favor. While we form our views based on news reports, the characteristics of a travel destination, and the events happening there, not all characteristics and events have the same impact on our opinions. Different categories …	Machine Learning; Sentiment Analysis; Tourism Demand; Tourist Arrivals	Learning systems; Sentiment analysis; Social networking (online); Classification scheme; Emotion classification; Empirical studies; Explanatory variables; Negative sentiments; Tourism demand; Tourist Arrivals; Tourist destinations; Neural networks	Conference paper	Scopus
126	Paolanti M.; Mancini A.; Frontoni E.; Felicetti A.; Marinelli L.; Marcheggiani E.; Pierdicca R.	Paolanti, Marina (57188734162); Mancini, Adriano (24341691500); Frontoni, Emanuele (9737451300); Felicetti, Andrea (57197820288); Marinelli, Luca (57217121390); Marcheggiani, Ernesto (34880259900); Pierdicca, Roberto (56460209100)	57188734162; 24341691500; 9737451300; 57197820288; 57217121390; 34880259900; 56460209100	Tourism destination management using sentiment analysis and geo-location information: a deep learning approach	2021	10.1007/s40558-021-00196-4	https://www.scopus.com/inward/record.uri?eid=2-s2.0-85100982689&doi=10.1007%2fs40558-021-00196-4&partnerID=40&md5=c4f6817cdfce324acb7d9eaa952ffa1b	Sentiment analysis on social media such as Twitter is a challenging task given the data characteristics such as the length, spelling errors, abbreviations, and special characters. Social media sentiment analysis is also a fundamental issue with many applications. With particular regard of the tourism sector, where the characterization of fluxes is a vital issue, the sources of geotagged informati…	Deep learning; Geotagged social media; Sentiment analysis; Tourism		Article	Scopus
127	Jia Z.; Li D.	Jia, Zhiyang (50361674700); Li, Ding (55286673200)	50361674700; 55286673200	An Application of Knowledge Management System for Tourism Regions	2017	10.1109/CICN.2016.80	https://www.scopus.com/inward/record.uri?eid=2-s2.0-85040090308&doi=10.1109%2fCICN.2016.80&partnerID=40&md5=91f5943aabd2a34231905530d8e1e331	An application of knowledge management system for tourism management is presented. The knowledge system can be featured as an online web application which is capable of stores and retrieves knowledge, improves collaboration, locates knowledge sources, mines repositories for hidden knowledge, captures and uses knowledge. The knowledge management system is viewed as an effective solution to get out…	knowledge entity; knowledge management system; tourism regions	Artificial intelligence; Knowledge based systems; Knowledge management; User interfaces; Effective solution; knowledge entity; Knowledge management system; Knowledge sources; Knowledge system; Tourism management; tourism regions; Web user interface; Information management	Conference paper	Scopus
128	Bo X.; Shi-Ting L.	Bo, Xue (56494405800); Shi-Ting, Lin (56495580900)	56494405800; 56495580900	Management of tourism resources and demand based on neural networks	2015	10.1109/ICICTA.2014.91	https://www.scopus.com/inward/record.uri?eid=2-s2.0-84921808713&doi=10.1109%2fICICTA.2014.91&partnerID=40&md5=0157da87473c742c07edf233532b30d9	Accurate prediction for inbound tourism demand is important for development and implement of Chinese inbound tourism strategy. It has positive significance. BP neural network as a common traditional machine learning methods is widely used in travel demand forecasting model. However, BP neural network suffers from several drawbacks, such as over fitting, difficulties in setting parameters and loca…	Inbound Tourism Development Strategy; Machine Learning; Neural Network Ensemble; Tourism Demand Prediction	Forecasting; Learning systems; Machine learning; Neural networks; Planning; Soft computing; Statistical methods; Artificial intelligence methods; Inbound tourisms; Local minima problems; Machine learning methods; Neural network ensembles; Soft computing methods; Tourism demand; Travel demand forecasting model; Arts computing	Conference paper	Scopus
129	Dey S.; Shukla D.	Dey, Sharmistha (57203203857); Shukla, DIksha (57220648870)	57203203857; 57220648870	Analytical study on use of AI techniques in tourism sector for smarter customer experience management	2020	10.1109/ICCSEA49143.2020.9132925	https://www.scopus.com/inward/record.uri?eid=2-s2.0-85089775223&doi=10.1109%2fICCSEA49143.2020.9132925&partnerID=40&md5=9e0b6d464ad2746d64281f66b1093d96	Artificial Intelligence is the new prime factor for paradigm shift of the new age technologies. It has created a new realm in every field- from education to entertainment or from biotechnology to manufacturing industry. Though tourism is a late runner in this race, but this sector has also witnessed a huge change with the magical touch of AI. This sector being one of the highly emerging sectors, …	Artificial neural network; ChatBot; Machine Learning; Predictive Analytics; Recommendation System; Robotics	Augmented reality; Data Analytics; Deep learning; Entertainment industry; Learning systems; Predictive analytics; Service industry; Tourism; Analytical studies; Customer experience; Dynamic pricing; Machine learning techniques; Manufacturing industries; On-line service; Paradigm shifts; Technological adaptation; Engineering education	Conference paper	Scopus
130	Raikov A.	Raikov, Alexander (36806473600)	36806473600	Megapolis tourism development strategic planning with cognitive modelling support	2020	10.1007/978-981-15-0637-6_12	https://www.scopus.com/inward/record.uri?eid=2-s2.0-85077112749&doi=10.1007%2f978-981-15-0637-6_12&partnerID=40&md5=726059434d4243f3616d1f5212fbbb7d	The strategic planning of the megapolis tourism development is the process that has to take into account hundreds of factors. Some of the factors cannot be calculated or do not have statistic history. Some of the factors are latent or incorrect. The long-term strategic planning usually includes a short-term action planning. In this case, experts are creating cognitive models that take into consid…	Artificial intelligence; Big data; Cognitive modelling; Convergent approach; Megapolis; Strategic planning; Tourism development	Artificial intelligence; Big data; Decision making; Genetic algorithms; Inverse problems; Problem solving; Semantics; Cognitive modelling; Cognitive semantics; Convergent approach; Megapolis; Quantitative factors; Strategic decision making; Strategic direction; Tourism development; Strategic planning	Conference paper	Scopus
131	Li D.	Li, Dai (57191189685)	57191189685	Platform construction and application research based on the smarter tourism tmca (Traffic management contractors association) system	2016	10.5013/IJSSST.a.17.09.02	https://www.scopus.com/inward/record.uri?eid=2-s2.0-84987818161&doi=10.5013%2fIJSSST.a.17.09.02&partnerID=40&md5=1aefb2b1238e3610eca6a1a18d9a9b35	Domestic scenic spots during the golden week holidays are subjected to the flow of large number of tourists leading to the scenic spot services to suffer from management difficulties. Both nationally and abroad the concept of "smarter tourism" is being put forward. Smart scenic area construction, smarter tourism in the national information construction of scenic spots are stated in the agenda. It…	Scenic spot mangament; Smart scenic area; Smarter tourism; TMCA system	Artificial intelligence; Contractors; Marine communication; Artificial intelligence technologies; Information construction; International marine contractors associations; Mobile communications; Scenic areas; Scenic spot; Smarter tourism; TMCA system; Distributed computer systems	Article	Scopus
132	Guo W.	Guo, Wenru (57289503500)	57289503500	Safety Risk Assessment of Tourism Management System Based on PSO-BP Neural Network	2021	10.1155/2021/1980037	https://www.scopus.com/inward/record.uri?eid=2-s2.0-85116700527&doi=10.1155%2f2021%2f1980037&partnerID=40&md5=dbf74d77e0f7c55057e59b7fc8db6843	With the development of science and technology, system management is gradually applied to tourism management. How to correctly assess the security risks of the tourism management system has become an important means to maintain passenger information. The security risk index of the travel management system is input into the PSO-BP network as a sample, and the corresponding risk value of the index …		Algorithms; Neural Networks, Computer; Risk Assessment; Tourism; Backpropagation; Errors; Information management; Network security; Risk assessment; BP networks; BP neural networks; Development of science and technologies; Evaluation models; Management systems; Model-based OPC; Safety risk assessments; Science systems; Security risks; Tourism management; algorithm; risk assessment; tourism; Radia…	Article	Scopus
133	Tsang W.K.; Benoit D.F.	Tsang, Wai Kit (57213607292); Benoit, Dries F. (26030285100)	57213607292; 26030285100	Gaussian processes for daily demand prediction in tourism planning	2020	10.1002/for.2644	https://www.scopus.com/inward/record.uri?eid=2-s2.0-85077871646&doi=10.1002%2ffor.2644&partnerID=40&md5=1e55d20cd9190a0376bf2007c6a94450	This study proposes Gaussian processes to forecast daily hotel occupancy at a city level. Unlike other studies in the tourism demand prediction literature, the hotel occupancy rate is predicted on a daily basis and 45 days ahead of time using online hotel room price data. A predictive framework is introduced that highlights feature extraction and selection of the independent variables. This appro…	daily data; feature extraction; Gaussian processes; prediction interval; tourism demand forecast	Decision making; Extraction; Feature extraction; Forecasting; Gaussian noise (electronic); Hotels; Learning systems; Tourism; Auto-regressive integrated moving average; Daily datum; Feature extraction and selection; Gaussian Processes; Machine learning methods; Managerial decision making; Prediction interval; Tourism demand; Gaussian distribution	Article	Scopus
134	Rong F.	Rong, Feng (57196376303)	57196376303	Design of tourism resources management based on artificial intelligence	2017	10.1109/ICITBS.2016.97	https://www.scopus.com/inward/record.uri?eid=2-s2.0-85032814703&doi=10.1109%2fICITBS.2016.97&partnerID=40&md5=6a141fc3c152df27f3f3fbc809d396cb	In the era of Web 2.0, it provides great chances for users to obtain rich information. Particularly, tourists want to easily get tremendous information about their tourism plans. Therefore, in this paper, we aim to design a tourism resources management system and guide the tourists to plan their travel routes. The proposed tourism resources management system contains information organization and …	Artificial Intelligence; Heterogeneous Web data extraction; Hidden conditional random fields; Tourism resources management; Web 2.0	Artificial intelligence; Big data; Collaborative filtering; Data mining; Extraction; Information filtering; Information services; Smart city; Websites; Artificial intelligence techniques; Hidden conditional random fields; High quality information; Information organization; Resources management; Tourism websites; Web 2.0; Web data extraction; Information management	Conference paper	Scopus
135	Kim K.; Park O.-J.; Yun S.; Yun H.	Kim, Kun (57192960908); Park, Oun-joung (25422533800); Yun, Seunghyun (57192955653); Yun, Haejung (57192955014)	57192960908; 25422533800; 57192955653; 57192955014	What makes tourists feel negatively about tourism destinations? Application of hybrid text mining methodology to smart destination management	2017	10.1016/j.techfore.2017.01.001	https://www.scopus.com/inward/record.uri?eid=2-s2.0-85009476386&doi=10.1016%2fj.techfore.2017.01.001&partnerID=40&md5=f7e9df4cd598dab5895ff014897bc61a	Recently, the Internet has brought a big change in tourists' behavior patterns. Travelers not only reserve hotels and airline tickets online, but also exchange travel information and descriptions of pleasant or unpleasant travel experiences through online review sites and personal travel blogs. In spite of the increasing use of online channels, application of online text data has been limited sin…	Sentiment analysis; Smart destination management; Smart tourism; Text mining; User-generated content (UGC)	France; Ile de France; Paris; Ville de Paris; Data handling; Data mining; Natural language processing systems; Quality control; Sentiment analysis; Smart tourism; Technological advances; Text mining; Tourists' perceptions; Transportation services; Travel information; User generated content (UGC); data mining; tourism management; tourist behavior; tourist destination; Big data	Article	Scopus
136	Ghaderi Z.; Hatamifar P.; Khalilzadeh J.	Ghaderi, Zahed (55224344100); Hatamifar, Pezhman (57200696076); Khalilzadeh, Jalayer (55822152900)	55224344100; 57200696076; 55822152900	Analysis of tourist satisfaction in tourism supply chain management	2018	10.1080/13032917.2018.1439074	https://www.scopus.com/inward/record.uri?eid=2-s2.0-85042943655&doi=10.1080%2f13032917.2018.1439074&partnerID=40&md5=83ee0b08ea0b7381e6633886059b76d7	This study investigates factors in tourism supply chain management (TSCM) which can influence tourist satisfaction in Isfahan, the leading tourist destination in Iran. Applying a neural network based on intelligent algorithm, the results indicate that factors such as recreation and entertainment, transportation system, tourism attractions, catering services, shopping and accommodation services fa…	customer satisfaction; neural networks; supply chain management; Tourism supply chain; tourists	Esfahan [Iran]; Iran; algorithm; artificial neural network; developing world; infrastructural development; supply chain management; tourist behavior; tourist destination	Article	Scopus
137	Vladykina J.O.; Kazanskaya O.V.	Vladykina, J.O. (57193878762); Kazanskaya, O.V. (6602506832)	57193878762; 6602506832	Information model of decision-making in management regional tourism	2017	10.1109/IFOST.2016.7884164	https://www.scopus.com/inward/record.uri?eid=2-s2.0-85017324772&doi=10.1109%2fIFOST.2016.7884164&partnerID=40&md5=6640a8dee2f39cc0c98f7b9f86f23653	Regular monitoring of investment, tourism and recreation, and business activity in the territory is required for good governance in the field of regional tourism need. Existing federal statistical database does not contain all the necessary information. a source of information up to date for decision-making on land-use planning and development of tourist and recreational zones and clusters. Multi…	database; decision support system; information model; information technology; the strategy of territorial management of tourism and recreation cluster	Artificial intelligence; Data acquisition; Data handling; Database systems; Decision support systems; Economics; Information management; Information technology; Information theory; Land use; Automatic data processing; Business activities; Data acquisition system; Decision making tool; Information Modeling; Qualitative information; Statistical database; the strategy of territorial management of to…	Conference paper	Scopus
138	Yang P.	Yang, Ping (57283053400)	57283053400	Construction of Tourism Management Information System Based on Django	2022	10.1007/978-981-16-5857-0_92	https://www.scopus.com/inward/record.uri?eid=2-s2.0-85116304410&doi=10.1007%2f978-981-16-5857-0_92&partnerID=40&md5=35390b0390630687da426b33d9a750d1	With the improvement of social material living standard, domestic tourism and outbound tourism are growing rapidly. In order to improve the quality of tourism service and grasp the business information timely, accurately and quickly, it is necessary to build a tourism management information system. The storage and processing of tourism information system is information related to tourism business…	Dijkstra algorithm; Distributed database; Django	Artificial intelligence; Decision support systems; Distributed database systems; Information use; Business decision supports; Business information; Dijkstra's algorithms; Distributed database; Django; Domestic tourisms; Living standards; Tourism information system; Tourism management; Tourism services; Information management	Conference paper	Scopus
139	Zhang J.; Ji M.; Zhang Y.	Zhang, Jiekuan (54880303600); Ji, Mei (57206422807); Zhang, Yan (57203831826)	54880303600; 57206422807; 57203831826	Tourism sustainability in Tibet - Forward planning using a systems approach	2015	10.1016/j.ecolind.2015.04.006	https://www.scopus.com/inward/record.uri?eid=2-s2.0-84928686621&doi=10.1016%2fj.ecolind.2015.04.006&partnerID=40&md5=7cf5c3523d405787207a0cca7a4f3563	The purpose of this study is to employ a nonlinear dynamic evaluation method to assess the tourism sustainability of Tibet Autonomous Region (TAR), China, a new emerging tourism destination. The methodology draws on system dynamics and Back Propagation (BP) neural network. According to 7 setting principles, this study identifies 13 tourism sustainability indicators including conventional tourism …	BP neural network; Evaluation of tourism sustainability; System dynamics; Tourism sustainability	China; Xizang; Backpropagation; Evolutionary algorithms; Genetic algorithms; Network layers; Neural networks; Research and development management; Sustainable development; System theory; Back propagation neural networks; BP neural networks; Dynamic evaluation methods; Particle swarm algorithm; Sustainability indicators; Sustainable tourism development; System Dynamics; Tibet autonomous region; ac…	Article	Scopus
140	Siroosi H.; Heshmati G.; Salmanmahiny A.	Siroosi, Hamid (55243382700); Heshmati, Gholamali (25228397600); Salmanmahiny, Abdolrassoul (55636844700)	55243382700; 25228397600; 55636844700	Can empirically based model results be fed into mathematical models? MCE for neural network and logistic regression in tourism landscape planning	2020	10.1007/s10668-019-00363-y	https://www.scopus.com/inward/record.uri?eid=2-s2.0-85072111033&doi=10.1007%2fs10668-019-00363-y&partnerID=40&md5=f7ec723019297dedb7aea56c9ad2c1c9	A wide variety of mathematical and empirical models have been implemented as practical tools for land-use planning, and multilayer perceptron (MLP), logistic regression or LR (mathematical model) and multi-criteria evaluation or MCE (empirical) are among widely applied models. One of the main drawbacks of the mathematical models is that they require dependent data and the process of data collecti…	Logistic regression; MCE; Multilayer perceptron; Tourism	Golestan; Iran; artificial neural network; landscape planning; model; regression analysis; tourism	Article	Scopus
141	Lisi F.A.; Esposito F.	Lisi, Francesca Alessandra (7003320398); Esposito, Floriana (35502785400)	7003320398; 35502785400	An AI application to integrated tourism planning	2015	10.1007/978-3-319-24309-2_19	https://www.scopus.com/inward/record.uri?eid=2-s2.0-84983442959&doi=10.1007%2f978-3-319-24309-2_19&partnerID=40&md5=d8f2524d594021e9fd5d86c6f37c92f7	Integrated Tourism can be defined as the kind of tourism which is explicitly linked to the localities in which it takes place and, in practical terms, has clear connections with local resources, activities, products, production and service industries, and a participatory local community. In this paper we report our experience in applying Artificial Intelligence techniques to Integrated Tourism pl…		Artificial intelligence; Data mining; Learning systems; Semantic Web; Urban planning; AI applications; Artificial intelligence techniques; Automated composition; Domain ontologies; Information extraction tools; Service industries; Service infrastructure; Tourism planning; Web services	Conference paper	Scopus
142	Boukherouk M.; Ed-dali R.; Dbibirha Y.	Boukherouk, Mohamed (57210174689); Ed-dali, Rachid (57442460300); Dbibirha, Youness (57483283300)	57210174689; 57442460300; 57483283300	Sharing Tourism and Its Impact on Hospitality Management in Essaouira: Analysis of the Evolution of Booking.com and Airbnb	2020	10.1007/978-3-030-36342-0_12	https://www.scopus.com/inward/record.uri?eid=2-s2.0-85116269304&doi=10.1007%2f978-3-030-36342-0_12&partnerID=40&md5=88ce3883e2337237f5b9cf9d56566f3a	Social networks jostle the terms of tourism communication. The presence of hotels on the web was, first, disrupted by the arrival of TripAdvisor and Booking.com. Recently, the platform of Airbnb has become a giant in the field of communication and the sales of accommodation. Faced with this reality, the traditional types of accommodations must adapt to a competitive environment where the client-t…	Airbnb; Booking.com; Essaouira; Innovation; Sharing tourism; Social networks		Conference paper	Scopus
143	Lin Y.-C.; Chang F.-H.; Chu K.-C.; Chang K.-C.; Hsu T.-L.; Wang H.-C.; Nguyen T.-T.; Sung T.-W.	Lin, Yuh-Chung (8684272700); Chang, Fu-Hsiang (57221096811); Chu, Kai-Chun (57207356615); Chang, Kuo-Chi (57095265500); Hsu, Tsui- Lien (57219297528); Wang, Hsiao-Chuan (57215508279); Nguyen, Trong-The (55511468400); Sung, Tien-Wen (35212113800)	8684272700; 57221096811; 57207356615; 57095265500; 57219297528; 57215508279; 55511468400; 35212113800	Study of Iterative Learning Control Algorithm in Tourism Management IoT Platform Application	2021	10.1007/978-3-030-69717-4_22	https://www.scopus.com/inward/record.uri?eid=2-s2.0-85103445408&doi=10.1007%2f978-3-030-69717-4_22&partnerID=40&md5=84fdbf8f2025a92c42796be8872272ef	Travel safety represents whether sightseeing activities can proceed smoothly and satisfy customers. The current travel business management system platform mainly focuses on the five main aspects of channels, products, funds, data, and supervision. There is still a serious lack of on-site safety. In this study, it is designed by the on-site tourism safety management system. The system is mainly co…	Big data; ILCA; IoT; IoT; Tourism management platform; Travel safety	Customer satisfaction; Information management; Iterative methods; Learning algorithms; Machine learning; Quality control; Tourism; Business management systems; Control inputs; Iterative learning control algorithm; Output errors; Output trajectory; Quality of controls; Safety management systems; Tourism management; Internet of things	Conference paper	Scopus
144	Wang N.	Wang, Nan (57224899707)	57224899707	Application of DASH client optimization and artificial intelligence in the management and operation of big data tourism hotels	2022	10.1016/j.aej.2021.04.080	https://www.scopus.com/inward/record.uri?eid=2-s2.0-85108553532&doi=10.1016%2fj.aej.2021.04.080&partnerID=40&md5=b43e9c76fa935b9e4ece527eedd459a7	The hotel uses modern information technology to establish a customer data group, which contains information about the customer's information on space configuration, color design, etc., and uses scientific operation methods to accelerate the rapid, transformation and upgrading of the hotel. The rapid development of information technology represented by the big intelligent mobile cloud has a lot of…	Artificial intelligence; Big data; DASH client optimization; Hotel operations	Adaptive algorithms; Artificial intelligence; Balancing; Engineering education; Environmental management; Hotels; Information management; Sales; Customer data; Customer information; DASH client optimization; Data groups; Hotel managements; Hotel operation; Management systems; Modern information technologies; Optimisations; Space configuration; Big data	Article	Scopus
145	Yuensuk T.; Limpinan P.; Nuankaew W.S.; Nuankaew P.	Yuensuk, Thanet (57682249400); Limpinan, Potsirin (57680855200); Nuankaew, Wongpanya Sararat (57193735880); Nuankaew, Pratya (56426447600)	57682249400; 57680855200; 57193735880; 56426447600	Information Systems for Cultural Tourism Management Using Text Analytics and Data Mining Techniques	2022	10.3991/ijim.v16i09.30439	https://www.scopus.com/inward/record.uri?eid=2-s2.0-85129924830&doi=10.3991%2fijim.v16i09.30439&partnerID=40&md5=8a1b64332aceb24fe0978c21e815d6f5	Using technology to deliver specific human interests is gaining attention. It results in humans being presented differently with what each individual wants. Therefore, this research aims to develop a culturally tourism recommended application using machine learning technology. It has three objectives: to develop a predictive model for cultural tourism management using text mining techniques, to e…	Cultural tourism management; Opinion data mining; Text mining; Tourist attraction; Tourist experience		Article	Scopus
146	Li K.; Lu W.; Liang C.; Wang B.	Li, Keqing (57210218135); Lu, Wenxing (24314743900); Liang, Changyong (10038789900); Wang, Binyou (57202463951)	57210218135; 24314743900; 10038789900; 57202463951	Intelligence in tourism management: A hybrid FOA-BP method on daily tourism demand forecasting with web search data	2019	10.3390/MATH7060531	https://www.scopus.com/inward/record.uri?eid=2-s2.0-85069970518&doi=10.3390%2fMATH7060531&partnerID=40&md5=b50e5da112b7e82dd20f452e850edd2d	The Chinese tourism industry has been developing rapidly for the past several years, and the number of people traveling has been increasing year by year. However, many problems still beset current tourism management. Lack of effective management has caused numerous problems, such as tourists stranded during tourist season and the declining service quality of scenic spots, which have become the fo…	Forecast of daily tourism demand; Fruit fly optimization algorithm; Hybrid method; Neural network; Optimization method; Tourism management; Web search data		Article	Scopus
147	Wang L.	Wang, Liangliang (57438333100)	57438333100	Tourism Demand Forecast Based on Adaptive Neural Network Technology in Business Intelligence	2022	10.1155/2022/3376296	https://www.scopus.com/inward/record.uri?eid=2-s2.0-85123969940&doi=10.1155%2f2022%2f3376296&partnerID=40&md5=7f6c0d28623d2ee2f108a5d12798e84c	In order to improve the effect of tourism demand forecast, the commercial development of the tourism industry, and the actual experience of users, this paper uses adaptive neural network technology to conduct tourism demand forecast analysis. Moreover, this paper improves the adaptive neural network algorithm so that it can handle multiple data for tourism demand forecast. After improving the alg…		Algorithms; Intelligence; Neural Networks, Computer; Technology; Tourism; Forecasting; Adaptive neural networks; Business-intelligence; Commercial development; Demand forecast; Forecast analysis; Forecast models; Model-based OPC; Network technologies; Tourism demand; Tourism industry; algorithm; intelligence; technology; tourism; Travel time	Article	Scopus
148	Stylos N.; Zwiegelaar J.	Stylos, Nikolaos (12797931300); Zwiegelaar, Jeremy (57208174265)	12797931300; 57208174265	Big data as a game changer: How does it shape business intelligence within a tourism and hospitality industry context?	2019	10.1007/978-981-13-6339-9_11	https://www.scopus.com/inward/record.uri?eid=2-s2.0-85064033142&doi=10.1007%2f978-981-13-6339-9_11&partnerID=40&md5=9cf196d336c60b7db5a3115b8c2c62a4	With the advent of web analytics, data mining and predictive modeling, businesses have nowadays a better knowledge in creatingmore efficient and effective processes for meeting customers' needs, driven by a wealth of available information. The value of big data in influencing business intelligence in the tourism and hospitality industry has also been widely acknowledged, as the synergetic utiliza…	Analytical framework; Big data; Business intelligence; Hospitality; Marketing; Stakeholders; Tourism	Artificial intelligence; Competitive intelligence; Data mining; Decision support systems; Marketing; Optimization; Predictive analytics; Analytical framework; External data sources; Hospitality; Predictive modeling; Stakeholders; Synergetic utilizations; Tourism; Tourism and hospitality industries; Big data	Book chapter	Scopus
149	Bellodi E.; Zese R.; Bertasi F.	Bellodi, Elena (36607390600); Zese, Riccardo (55813375100); Bertasi, Francesco (57466895300)	36607390600; 55813375100; 57466895300	Machine Learning in a Policy Support System for Smart Tourism Management	2022	10.1007/978-3-030-95467-3_33	https://www.scopus.com/inward/record.uri?eid=2-s2.0-85125254899&doi=10.1007%2f978-3-030-95467-3_33&partnerID=40&md5=d9d2726408c3bf6cef65ef762f5b8c97	In the last few years, the Emilia-Romagna region, in Italy, has seen a significant growth in the tourism economy, due to an increasing number of Italian and foreigner visitors. This has highlighted the need of a strong synergy between tourist facilities and local administrations. In this context, Smart City solutions and Machine Learning (ML) can play an important role to analyse the amount of da…	Data-driven predictive modelling; Machine Learning; Smart City platform; Tourism	Machine learning; Smart city; Data driven; Data-driven predictive modeling; Intelligent Services; Machine-learning; Policy support; Predictive models; Smart city platform; Supervised machine learning; Support systems; Tourism management; Information management	Conference paper	Scopus
150	Bodkhe U.; Bhattacharya P.; Tanwar S.; Tyagi S.; Kumar N.; Obaidat M.S.	Bodkhe, Umesh (57211485844); Bhattacharya, Pronaya (57200306370); Tanwar, Sudeep (56576145100); Tyagi, Sudhanshu (55549655700); Kumar, Neeraj (57206866080); Obaidat, M.S. (7005628795)	57211485844; 57200306370; 56576145100; 55549655700; 57206866080; 7005628795	BloHosT: Blockchain enabled smart tourism and hospitality management	2019	10.1109/CITS.2019.8862001	https://www.scopus.com/inward/record.uri?eid=2-s2.0-85074157801&doi=10.1109%2fCITS.2019.8862001&partnerID=40&md5=82a3f36f49e6ceb90110dc564f641d24	In the era of Industry 4.0, e-tourism uses bulk of digital payments through applications supported by heterogeneous payment gateways. These heterogeneous payment gateways open the doors for the attackers to perform malicious activities such as-hacking of wallet accounts, identity theft, attacks on payment clearance cycles. In e-tourism, financial data is maintained in a centralized cloud server, …	Blockchain; BloHosT; Security; TeDL; Tourism	Deep learning; Personal computing; Railroad transportation; BloHosT; Malicious activities; Payment gateways; Return of investments; Security; TeDL; Tourism; Trust and reputation managements; Blockchain	Conference paper	Scopus

## Sheet: web of science
	Publication Type	Authors	Book Authors	Book Editors	Book Group Authors	Author Full Names	Book Author Full Names	Group Authors	Article Title	Source Title	Book Series Title	Book Series Subtitle	Language	Document Type	Conference Title	Conference Date	Conference Location	Conference Sponsor	Conference Host	Author Keywords	Keywords Plus	Abstract	Addresses	Affiliations	Reprint Addresses	Email Addresses	Researcher Ids	ORCIDs	Funding Orgs	Funding Name Preferred	Funding Text	Cited References	Cited Reference Count	Times Cited, WoS Core	Times Cited, All Databases	180 Day Usage Count	Since 2013 Usage Count	Publisher	Publisher City	Publisher Address	ISSN	eISSN	ISBN	Journal Abbreviation	Journal ISO Abbreviation	Publication Date	Publication Year	Volume	Issue
1	C	Zuo, L; Kalmanbetova, G; Wu, YJ			ASSOC COMPUTING MACHINERY	Zuo, Lei; Kalmanbetova, Gulzat; Wu, Yujuan			Design of Risk Management Decision-making Framework for Tourism Enterprises Based on Artificial Intelligence	PROCEEDINGS OF 2023 INTERNATIONAL CONFERENCE ON AI AND METAVERSE IN SUPPLY CHAIN MANAGEMENT, AIMSCM 2023			English	Proceedings Paper	International Conference on AI and Metaverse in Supply Chain Management (AIMSCM)	NOV 18-19, 2023	Bhubaneswar, INDIA			Artificial Intelligence; Risk Management; Tourism Enterprises		As a global industry, tourism not only faces increasingly fierce competition, but also bears the threat of many internal and external risks. In this complex and changeable environment, tourism enterprises urgently need effective risk management decision-making mechanism to ensure business sustainability and profitability. This paper is devoted to designing a risk management decision-making framew…	[Zuo, Lei; Kalmanbetova, Gulzat; Wu, Yujuan] Bishkek State Univ, Fac Econ & Finance, Bishkek 720044, Kyrgyzstan		Wu, YJ (corresponding author), Bishkek State Univ, Fac Econ & Finance, Bishkek 720044, Kyrgyzstan.	425809016@qq.com; gkalmanbetova@bhu.kg; 1002124107@qq.com	Wu, Yujuan/HRB-0999-2023						12	0	0	3	3	ASSOC COMPUTING MACHINERY	NEW YORK	1601 Broadway, 10th Floor, NEW YORK, NY, UNITED STATES			979-8-4007-0825-1				2023
2	J	Mariani, M; Wirtz, J				Mariani, Marcello; Wirtz, Jochen			A critical reflection on analytics and artificial intelligence based analytics in hospitality and tourism management research	INTERNATIONAL JOURNAL OF CONTEMPORARY HOSPITALITY MANAGEMENT			English	Article						Analytics; Cognitive analytics; Artificial intelligence; Big data; Hospitality; Tourism	BIG DATA	PurposeThis work consists of a critical reflection on the extent to which hospitality and tourism management scholars have accurately used the term analytics and its five types (i.e. descriptive, exploratory, predictive, prescriptive and cognitive analytics) in their research. Only cognitive analytics, the latest and most advanced type, is based on artificial intelligence (AI) and requires machin…	[Mariani, Marcello] Univ Reading, Henley Business Sch, Reading, England; [Mariani, Marcello] Univ Bologna, Bologna, Italy; [Wirtz, Jochen] Natl Univ Singapore, NUS Business Sch, Singapore, Singapore	University of Reading; University of Bologna; National University of Singapore	Mariani, M (corresponding author), Univ Reading, Henley Business Sch, Reading, England.;Mariani, M (corresponding author), Univ Bologna, Bologna, Italy.	m.mariani@henley.ac.uk; jochen@nus.edu.sg	Mariani, Marcello/ABW-5250-2022; Wirtz, Jochen/P-3235-2015	Wirtz, Jochen/0000-0002-6297-4498					41	12	13	11	92	EMERALD GROUP PUBLISHING LTD	Leeds	Floor 5, Northspring 21-23 Wellington Street, Leeds, W YORKSHIRE, ENGLAND	0959-6119	1757-1049		INT J CONTEMP HOSP M	Int. J. Contemp. Hosp. Manag.	JUL 17	2023	35	8
3	J	Christensen, J; Hansen, JM; Wilson, P				Christensen, Jeff; Hansen, Jared M.; Wilson, Paul			Understanding the role and impact of Generative Artificial Intelligence (AI) hallucination within consumers' tourism decision-making processes	CURRENT ISSUES IN TOURISM			English	Article; Early Access						Generative Artificial Intelligence (AI); ChatGPT; tourism behaviour; hallucination misinformation; challenges in technology usage in tourism; Technology Acceptance Model (TAM)	USER ACCEPTANCE; PERCEIVED USEFULNESS; TECHNOLOGY; EASE	ChatGPT, which launched only a year ago, is the fastest-growing website in the world today. When generative AI software such as ChatGPT generates ideas for people, they often generate false ideas. This occurrence has been called 'AI Hallucination'. It can include generating false text output that is extremely believable to completely gibberish. This source of potential misinformation has signific…	[Christensen, Jeff] Brigham Young Univ Hawaii, Fac Business & Govt, Ctr Hospitality & Tourism, Laie, HI USA; [Hansen, Jared M.] Utah State Univ, Jon M Huntsman Sch Business, Dept Mkt & Strategy, Logan, UT 84322 USA; [Wilson, Paul] Brigham Young Univ Hawaii, Fac Business & Govt, Willes Ctr Int Entrepreneurship, Laie, HI USA	Brigham Young University; Brigham Young University - Hawaii; Utah System of Higher Education; Utah State University; Brigham Young University; Brigham Young University - Hawaii	Hansen, JM (corresponding author), Utah State Univ, Jon M Huntsman Sch Business, Dept Mkt & Strategy, Logan, UT 84322 USA.	jared@usu.edu							49	15	15	298	527	ROUTLEDGE JOURNALS, TAYLOR & FRANCIS LTD	ABINGDON	2-4 PARK SQUARE, MILTON PARK, ABINGDON OX14 4RN, OXON, ENGLAND	1368-3500	1747-7603		CURR ISSUES TOUR	Curr. Issues Tour.	2024 JAN 19	2024
4	J	El Hajal, G; Yeoman, I				El Hajal, Georges; Yeoman, Ian			AI and the future of talent management in tourism and hospitality	CURRENT ISSUES IN TOURISM			English	Article; Early Access						Artificial intelligence; employee outcomes; ethical AI; talent management; tourism and hospitality jobs; scenario planning	ARTIFICIAL-INTELLIGENCE; SCENARIO; LESSONS	This exploratory study investigates artificial intelligence (AI) integration's potential impact on the future of talent management in tourism and hospitality. Using the scenario planning method and Dator's Alternative Futures Framework, four 2035 alternative scenarios were constructed. These scenarios served as a foundation for 3 group and 30 individual scenario-planning sessions with internation…	[El Hajal, Georges] Univ Groningen, Fac Spatial Sci, Groningen, Netherlands; [El Hajal, Georges; Yeoman, Ian] NHL Stenden Univ, Hotel Management Sch Leeuwarden, Leeuwarden, Netherlands	University of Groningen; NHL Stenden University of Applied Sciences	El Hajal, G (corresponding author), Univ Groningen, Fac Spatial Sci, Groningen, Netherlands.;El Hajal, G (corresponding author), NHL Stenden Univ, Hotel Management Sch Leeuwarden, Leeuwarden, Netherlands.	g.el.hajal@rug.nl	Yeoman, Ian/N-9844-2014; El Hajal, Georges/LRC-2502-2024						65	0	0	10	10	ROUTLEDGE JOURNALS, TAYLOR & FRANCIS LTD	ABINGDON	2-4 PARK SQUARE, MILTON PARK, ABINGDON OX14 4RN, OXON, ENGLAND	1368-3500	1747-7603		CURR ISSUES TOUR	Curr. Issues Tour.	2024 DEC 10	2024
5	J	Hu, JH; Huang, GI; Wong, IA; Wan, LC				Hu, Jihao; Huang, GuoQiong Ivanka; Wong, IpKin Anthony; Wan, Lisa C.			AI trust divide: How recruiter-candidate roles shape tourism personnel decision-making	ANNALS OF TOURISM RESEARCH			English	Article						Artificial intelligence (AI); Motivated reasoning; Personnel decision-making agent; Scenario-based experiment; Quasi-experiment		The artificial intelligence revolution has prompted tourism organizations to consider whether and how to use AI to improve efficiency and create value, particularly in areas such as personnel selection. Through five experimental studies (N = 2199), this paper first reveals that a trust divide exists between job candidates and recruiters in travel agencies. We then investigate how the consideratio…	[Hu, Jihao] Xiamen Univ, Sch Management, Xiamen, Fujian, Peoples R China; [Huang, GuoQiong Ivanka] Hong Kong Polytech Univ, Sch Hotel & Tourism Management, TST East Kowloon, 17 Sci Museum Rd, Hong Kong, Peoples R China; [Wong, IpKin Anthony] Univ Macau, Fac Business Adm, Ave Univ, Taipa, Macau, Peoples R China; [Wan, Lisa C.] Chinese Univ Hong Kong CUHK, Sch Hotel & Tourism Management, CUHK Busin…	Xiamen University; Hong Kong Polytechnic University; University of Macau; Chinese University of Hong Kong	Huang, GI (corresponding author), Hong Kong Polytech Univ, Sch Hotel & Tourism Management, TST East Kowloon, 17 Sci Museum Rd, Hong Kong, Peoples R China.;Wan, LC (corresponding author), Chinese Univ Hong Kong CUHK, Sch Hotel & Tourism Management, CUHK Business Sch, Shatin, Hong Kong, Peoples R China.	harryhu@link.cuhk.edu.hk; ivanka.huang@polyu.edu.hk; anthonywong@um.edu.mo; lisawan@baf.cuhk.edu.hk	Wan, Lisa/AAR-2206-2021; Wong, IpKin/AAV-1664-2021	Huang, Guoqiong Ivanka/0000-0001-9232-6822	National Natural Science Foundation of China [72004239, 72074230]; PolyU (UGC) of the Hong Kong Special Administrative Region, China [P0048566, P0048183]; Direct Research Grant from the School of Hotel and Tourism Management, CUHK [5501127]	National Natural Science Foundation of China(National Natural Science Foundation of China (NSFC)); PolyU (UGC) of the Hong Kong Special Administrative Region, China; Direct Research Grant from the School of Hotel and Tourism Management, CUHK	This research is supported by the National Natural Science Foundation of China (No. 72004239, 72074230) , PolyU (UGC) of the Hong Kong Special Administrative Region, China (Project No. P0048566, P0048183) , and the Direct Research Grant from the School of Hotel and Tourism Management, CUHK (Grant No. 5501127) .		50	0	0	36	36	PERGAMON-ELSEVIER SCIENCE LTD	OXFORD	THE BOULEVARD, LANGFORD LANE, KIDLINGTON, OXFORD OX5 1GB, ENGLAND	0160-7383	1873-7722		ANN TOURISM RES	Ann. Touris. Res.	NOV	2024	109
6	C	Lisi, FA; Esposito, F		Gavanelli, M; Lamma, E; Riguzzi, F		Lisi, Francesca Alessandra; Esposito, Floriana			An AI Application to Integrated Tourism Planning	AI*IA 2015: ADVANCES IN ARTIFICIAL INTELLIGENCE	Lecture Notes in Artificial Intelligence		English	Proceedings Paper	14th International Conference of the Italian-Association-for-Artificial-Intelligence (AIIA)	SEP 23-25, 2015	Ferrara, ITALY	Italian Assoc Artificial Intelligence			MANAGEMENT; SERVICES; SYSTEM	Integrated Tourism can be defined as the kind of tourism which is explicitly linked to the localities in which it takes place and, in practical terms, has clear connections with local resources, activities, products, production and service industries, and a participatory local community. In this paper we report our experience in applying Artificial Intelligence techniques to Integrated Tourism pl…	[Lisi, Francesca Alessandra; Esposito, Floriana] Univ Bari Aldo Moro, Dipartimento Informat, Bari, Italy	Universita degli Studi di Bari Aldo Moro	Lisi, FA (corresponding author), Univ Bari Aldo Moro, Dipartimento Informat, Bari, Italy.	francesca.lisi@uniba.it; floriana.esposito@uniba.it	Esposito, Floriana/M-6038-2019						24	7	7	1	17	SPRINGER-VERLAG BERLIN	BERLIN	HEIDELBERGER PLATZ 3, D-14197 BERLIN, GERMANY	0302-9743	1611-3349	978-3-319-24309-2; 978-3-319-24308-5	LECT NOTES ARTIF INT			2015	9336
7	C	Bellodi, E; Zese, R; Bertasi, F		Nicosia, G; Ojha, V; LaMalfa, E; LaMalfa, G; Jansen, G; Pardalos, PM; Giuffrida, G; Umeton, R		Bellodi, Elena; Zese, Riccardo; Bertasi, Francesco			Machine Learning in a Policy Support System for Smart Tourism Management	MACHINE LEARNING, OPTIMIZATION, AND DATA SCIENCE (LOD 2021), PT I	Lecture Notes in Computer Science		English	Proceedings Paper	7th International Conference on Machine Learning, Optimization, and Data Science (LOD) / 1st Symposium on Artificial Intelligence and Neuroscience (ACAIN)	OCT 04-08, 2021	ELECTR NETWORK			Smart City platform; Tourism; Data-driven predictive modelling; Machine Learning	FLOW; CITY	In the last few years, the Emilia-Romagna region, in Italy, has seen a significant growth in the tourism economy, due to an increasing number of Italian and foreigner visitors. This has highlighted the need of a strong synergy between tourist facilities and local administrations. In this context, Smart City solutions and Machine Learning (ML) can play an important role to analyse the amount of da…	[Bellodi, Elena; Zese, Riccardo; Bertasi, Francesco] Univ Ferrara, Dept Engn, Via Saragat 1, I-44122 Ferrara, Italy	University of Ferrara	Bellodi, E (corresponding author), Univ Ferrara, Dept Engn, Via Saragat 1, I-44122 Ferrara, Italy.	felena.bellodi@unife.it; riccardo.zese@unife.it; francesco.bertasi@unife.it	Zese, Riccardo/Q-8581-2017; BELLODI, Elena/HNP-1127-2023		Fondo di Sviluppo e Coesione (FSC) of Regione Emilia-Romagna within the context of the POR FESR 2014-2020 ASSE 1 AZIONE 1.2.2 [CUP E21F18000200007]	Fondo di Sviluppo e Coesione (FSC) of Regione Emilia-Romagna within the context of the POR FESR 2014-2020 ASSE 1 AZIONE 1.2.2	This research was funded by the Fondo di Sviluppo e Coesione (FSC) of Regione Emilia-Romagna within the context of the POR FESR 2014-2020 ASSE 1 AZIONE 1.2.2 (CUP E21F18000200007) project POLIcy Support systEm for smart citY data governancE (POLIS-EYE).		17	1	1	0	11	SPRINGER INTERNATIONAL PUBLISHING AG	CHAM	GEWERBESTRASSE 11, CHAM, CH-6330, SWITZERLAND	0302-9743	1611-3349	978-3-030-95467-3; 978-3-030-95466-6	LECT NOTES COMPUT SC			2022	13163
8	J	Chen, C; Wei, Z				Chen, Chen; Wei, Zhao			Role of Artificial Intelligence in travel decision making and tourism product selling	ASIA PACIFIC JOURNAL OF TOURISM RESEARCH			English	Article						Artificial intelligence; tourism; travel; tourism product selling; travel decision making; tourism industry	ACCEPTANCE; REVIEWS	In this work, data is collected through a questionnaire evaluating factors, such as informativeness from AI, recommendations via AI, social media, customer purchase behavior, learning new strategies, and online tourism marketing influence. The data underwent analysis using the Statistical Package for Social Sciences (SPSS), which allowed us to perform various analysis methods, such as ANOVA analy…	[Chen, Chen] Fuzhou Univ Int Studies & Trade, Fuzhou, Peoples R China; [Wei, Zhao] Xiamen Inst Technol, Sunban South Rd, Xiamen, Peoples R China; [Wei, Zhao] Fuzhou Univ Int Studies & Trade, Fuzhou 350202, Peoples R China; [Wei, Zhao] Xiamen Inst Technol, 1251 Sunban South Rd, Xiamen, Peoples R China	Xiamen Institute of Technology; Xiamen Institute of Technology	Wei, Z (corresponding author), Fuzhou Univ Int Studies & Trade, Fuzhou 350202, Peoples R China.;Wei, Z (corresponding author), Xiamen Inst Technol, 1251 Sunban South Rd, Xiamen, Peoples R China.	wzhao9456@gmail.com							23	2	2	45	74	ROUTLEDGE JOURNALS, TAYLOR & FRANCIS LTD	ABINGDON	2-4 PARK SQUARE, MILTON PARK, ABINGDON OX14 4RN, OXON, ENGLAND	1094-1665	1741-6507		ASIA PAC J TOUR RES	Asia Pac. J. Tour. Res.	MAR 3	2024	29	3
9	C	Rong, F			IEEE	Rong, Feng			Design of tourism resources management based on artificial intelligence	2016 INTERNATIONAL CONFERENCE ON INTELLIGENT TRANSPORTATION, BIG DATA & SMART CITY (ICITBS)			English	Proceedings Paper	International Conference on Intelligent Transportation, Big Data & Smart City (ICITBS)	DEC 17-18, 2016	Changsha, PEOPLES R CHINA	Yunnan Normal Univ,Changsha Univ Sci & Technol		Tourism resources management; Artificial Intelligence; Hidden conditional random fields; Heterogeneous Web data extraction; Web 2.0	SUSTAINABLE TOURISM; DATA EXTRACTION; WEB DATA	In the era of Web 2.0, it provides great chances for users to obtain rich information. Particularly, tourists want to easily get tremendous information about their tourism plans. Therefore, in this paper, we aim to design a tourism resources management system and guide the tourists to plan their travel routes. The proposed tourism resources management system contains information organization and …	[Rong, Feng] Liaoning Jianzhu Vocat Coll, Liaoyang 111000, Liaoning, Peoples R China		Rong, F (corresponding author), Liaoning Jianzhu Vocat Coll, Liaoyang 111000, Liaoning, Peoples R China.	279049844@qq.com							18	2	2	0	13	IEEE	NEW YORK	345 E 47TH ST, NEW YORK, NY 10017 USA			978-1-5090-6061-0				2017
10	C	Yu, ZZ; Wang, S			IEEE	Yu, Zhenzhen; Wang, Shan			Smart Tourism Route Planning System Based on Machine Learning Algorithm	2022 INTERNATIONAL CONFERENCE ON COMPUTERS AND ARTIFICIAL INTELLIGENCE TECHNOLOGIES, CAIT			English	Proceedings Paper	International Conference on Computers and Artificial Intelligence Technologies (CAIT)	NOV 04-06, 2022	Quzhou Univ, Sch Elect & Informat Engn, Quzhou, PEOPLES R CHINA	IEEE,Macau Univ Sci & Technol,Beijing Univ Posts & Telecommunicat,Beijing Informat Sci & Technol Univ,Guangxi Univ,Inst Big Data & Informat Technol,Wenzhou Univ	Quzhou Univ, Sch Elect & Informat Engn	machine learning algorithm; smart tourism; route planning system; tourism industry		With the development of economy and the improvement of life quality, people have a deeper pursuit. Therefore, tourism has developed into one of the pillar industries of China's economy. Tourism has gradually become an important part of people's life and entertainment, but people's tourism consumption behavior has undergone significant changes, and they have a higher standard for tourism quality, …	[Yu, Zhenzhen; Wang, Shan] Shandong Inst Commerce & Technol, Jinan 250103, Shandong, Peoples R China	Shandong Institute of Commerce & Technology	Yu, ZZ (corresponding author), Shandong Inst Commerce & Technol, Jinan 250103, Shandong, Peoples R China.	yzzpsky@sict.edu.cn; sict_yu@163.com	Yu, Zhenzhen/A-5650-2013						11	0	0	1	6	IEEE	NEW YORK	345 E 47TH ST, NEW YORK, NY 10017 USA			979-8-3503-9617-1				2022
11	J	Paolanti, M; Mancini, A; Frontoni, E; Felicetti, A; Marinelli, L; Marcheggiani, E; Pierdicca, R				Paolanti, Marina; Mancini, Adriano; Frontoni, Emanuele; Felicetti, Andrea; Marinelli, Luca; Marcheggiani, Ernesto; Pierdicca, Roberto			Tourism destination management using sentiment analysis and geo-location information: a deep learning approach	INFORMATION TECHNOLOGY & TOURISM			English	Article						Sentiment analysis; Geotagged social media; Deep learning; Tourism	SOCIAL MEDIA DATA; CLASSIFICATION; REVIEWS	Sentiment analysis on social media such as Twitter is a challenging task given the data characteristics such as the length, spelling errors, abbreviations, and special characters. Social media sentiment analysis is also a fundamental issue with many applications. With particular regard of the tourism sector, where the characterization of fluxes is a vital issue, the sources of geotagged informati…	[Paolanti, Marina; Mancini, Adriano; Frontoni, Emanuele; Felicetti, Andrea; Marinelli, Luca; Marcheggiani, Ernesto; Pierdicca, Roberto] Univ Politecn Marche, Ancona, Marche, Italy	Marche Polytechnic University	Paolanti, M (corresponding author), Univ Politecn Marche, Ancona, Marche, Italy.	m.paolanti@univpm.it	Marinelli, Luca/KUF-4237-2024; Mancini, Adriano/J-5220-2012; Pierdicca, Roberto/AAH-9635-2020; Paolanti, Marina/AAA-1239-2021; Frontoni, Emanuele/D-9838-2013; MARCHEGGIANI, Ernesto/AGM-7101-2022	MARCHEGGIANI, Ernesto/0000-0002-6879-9942	Universita Politecnica delle Marche	Universita Politecnica delle Marche	Open Access funding provided by Universita Politecnica delle Marche.		51	28	28	3	83	SPRINGER HEIDELBERG	HEIDELBERG	TIERGARTENSTRASSE 17, D-69121 HEIDELBERG, GERMANY	1098-3058	1943-4294		INF TECHNOL TOUR	Inf. Technol. Tour.	JUN	2021	23	2
12	C	Wu, YJ; Kalmanbetova, G; Zuo, L			ASSOC COMPUTING MACHINERY	Wu, Yujuan; Kalmanbetova, Gulzat; Zuo, Lei			Research on Carrying Capacity and Resource Management of Tourism Destinations Combined with Machine Learning	PROCEEDINGS OF 2023 INTERNATIONAL CONFERENCE ON AI AND METAVERSE IN SUPPLY CHAIN MANAGEMENT, AIMSCM 2023			English	Proceedings Paper	International Conference on AI and Metaverse in Supply Chain Management (AIMSCM)	NOV 18-19, 2023	Bhubaneswar, INDIA			Machine Learning; Carrying Capacity; Resource Management; Tourism Destinations		Tourism is an important engine of economic development all over the world. However, the sustainability and resource management of tourist destinations have always been a concern. The purpose of this study is to explore how to combine machine learning(ML) technology to improve the carrying capacity and resource management of tourist destinations in order to improve their competitiveness and sustai…	[Wu, Yujuan; Kalmanbetova, Gulzat; Zuo, Lei] Bishkek State Univ, Fac Econ & Finance, Bishkek 720044, Kyrgyzstan		Wu, YJ (corresponding author), Bishkek State Univ, Fac Econ & Finance, Bishkek 720044, Kyrgyzstan.	1002124107@qq.com; gkalmanbetova@bhu.kg; 425809016@qq.com	Wu, Yujuan/HRB-0999-2023						12	0	0	1	1	ASSOC COMPUTING MACHINERY	NEW YORK	1601 Broadway, 10th Floor, NEW YORK, NY, UNITED STATES			979-8-4007-0825-1				2023
13	C	Obogo, JU; Adedoyin, FF		Almeida, JPA; Bork, D; Guizzardi, G; Montali, M; Proper, HA; Sales, TP		Obogo, Johnson Uke; Adedoyin, Festus Fatai			Data-Driven Business Analytics for the Tourism Industry in the UK: A Machine Learning Experiment Post-COVID	2021 IEEE 23RD CONFERENCE ON BUSINESS INFORMATICS, CBI 2021, VOL 2	Conference on Business Informatics		English	Proceedings Paper	IEEE 23rd Conference on Business Informatics (CBI)	SEP 01-03, 2021	ELECTR NETWORK	IEEE,IEEE Comp Soc		tourism businesses; COVID-19; data-driven business analytics; machine learning	DEMAND; MODEL	The use of data-driven business analytic models has had a significant impact on several sectors of the economy. In the UK, the tourism industry has contributed significantly to the economy. The contribution of tourism to the UK economy is estimated to be 145.9 pound billion (7.2%) of UK GDP. Regardless of its economic value, tourism is also one of the most vulnerable sectors, as it is susceptible…	[Obogo, Johnson Uke; Adedoyin, Festus Fatai] Bournemouth Univ, Dept Comp & Informat, Poole, Dorset, England	Bournemouth University	Obogo, JU (corresponding author), Bournemouth Univ, Dept Comp & Informat, Poole, Dorset, England.	s5229337@bournemouth.ac.uk; fadedoyin@bournemouth.ac.uk	Adedoyin, Festus/AAM-4667-2020						40	0	0	0	11	IEEE COMPUTER SOC	LOS ALAMITOS	10662 LOS VAQUEROS CIRCLE, PO BOX 3014, LOS ALAMITOS, CA 90720-1264 USA	2378-1963		978-1-6654-2069-3	CONF BUS INFORM			2021
14	J	Wang, N				Wang, Nan			Application of DASH client optimization and artificial intelligence in the management and operation of big data tourism hotels	ALEXANDRIA ENGINEERING JOURNAL			English	Article						DASH client optimization; Artificial intelligence; Big data; Hotel operations	ARCHITECTURES	The hotel uses modern information technology to establish a customer data group, which contains information about the customer's information on space configuration, color design, etc., and uses scientific operation methods to accelerate the rapid, transformation and upgrading of the hotel. The rapid development of information technology represented by the big intelligent mobile cloud has a lot of…	[Wang, Nan] Henan Univ Engn, Sch Econ & Trade, Zhengzhou 451191, Peoples R China	Henan University of Engineering	Wang, N (corresponding author), Henan Univ Engn, Sch Econ & Trade, Zhengzhou 451191, Peoples R China.	wangyushuo2016@tom.com	Wang, Nan/ACI-4675-2022						25	6	6	2	30	ELSEVIER	AMSTERDAM	RADARWEG 29, 1043 NX AMSTERDAM, NETHERLANDS	1110-0168	2090-2670		ALEX ENG J	Alex. Eng. J.	JAN	2022	61	1
15	J	Kim, JH; Kim, J; Park, J; Kim, C; Jhang, J; King, B				Kim, Jeong Hyun; Kim, Jungkeun; Park, Jooyoung; Kim, Changju; Jhang, Jihoon; King, Brian			When ChatGPT Gives Incorrect Answers: The Impact of Inaccurate Information by Generative AI on Tourism Decision-Making	JOURNAL OF TRAVEL RESEARCH			English	Article						ChatGPT; chatbot; AI recommendations; accessibility-diagnosticity; incorrect information; generative AI	WORD-OF-MOUTH; ALGORITHM; TRUST; TECHNOLOGIES; ADOPTION; DESIGN	This study investigates how inaccurate information provided by ChatGPT impacts travelers' acceptance of recommendations. Six experiments were conducted based on the accessibility-diagnosticity framework. These examined the moderating role of the prominence and type of incorrect information and their effects on decision-making. The results show that participants perceived more accuracy and trustwo…	[Kim, Jeong Hyun] Kyung Hee Univ, Smart Tourism Res Ctr, Seoul, South Korea; [Kim, Jungkeun] Auckland Univ Technol, Dept Mkt, Auckland, New Zealand; [Park, Jooyoung] Peking Univ, HSBC Business Sch, Shenzhen, Peoples R China; [Kim, Changju] Ritsumeikan Univ, Coll Business Adm, Ibaraki, Osaka, Japan; [Jhang, Jihoon] Univ Cent Arkansas, Dept Mkt & Management, Conway, AR USA; [King, Brian] Texas A&M …	Kyung Hee University; Auckland University of Technology; Peking University; Ritsumeikan University; University of Central Arkansas; Texas A&M University System; Texas A&M University College Station	Kim, J (corresponding author), Auckland Univ Technol, Dept Mkt, Auckland, New Zealand.	jkkim@aut.ac.nz	King, Brian/E-7201-2014; Jeong Hyun, Kim/JJE-9437-2023; Jhang, Jihoon/ABK-3423-2022; Kim, Changju/AAT-2096-2020; Kim, Jungkeun/AAE-7216-2020	Kim, Jungkeun/0000-0003-2104-833X; Jhang, Jihoon/0000-0001-9570-4024					95	20	20	101	257	SAGE PUBLICATIONS INC	THOUSAND OAKS	2455 TELLER RD, THOUSAND OAKS, CA 91320 USA	0047-2875	1552-6763		J TRAVEL RES	J. Travel Res.	JAN	2025	64	1
16	J	Schuhbert, A; Thees, H; Pechlaner, H				Schuhbert, Arne; Thees, Hannes; Pechlaner, Harald			Deep and organizational learning as innovation catalyzer in digital business ecosystems - a scenario analysis on the tourism destination Berlin	EUROPEAN JOURNAL OF INNOVATION MANAGEMENT			English	Article						Deep learning; Organizational learning; Innovation processes; Digital platforms; Digital business eco-systems; Destination Berlin	ABSORPTIVE-CAPACITY; KNOWLEDGE TRANSFER; HOSPITALITY; INDUSTRY; DIVERSIFICATION; PERSPECTIVE; NETWORKS; BEHAVIOR	PurposeThe below-average innovative capacity of the tourism sector raises the question on the potentials of digital business ecosystems (DBEs) to overcome these shortages at a destination level - especially within a smart city environment. Using the example of the German Capital Berlin, this article aims to discuss both the possibilities and inhibitors of innovative knowledge-creation by building…	[Schuhbert, Arne; Thees, Hannes; Pechlaner, Harald] Catholic Univ Eichstatt Ingolstadt, Chair Tourism, Ctr Entrepreneurship, Ingolstadt, Germany		Thees, H (corresponding author), Catholic Univ Eichstatt Ingolstadt, Chair Tourism, Ctr Entrepreneurship, Ingolstadt, Germany.	arne.schuhbert@ku.de; hannes.thees@outlook.de; harald.pechlaner@ku.de	Thees, Hannes/GYV-2576-2022	Thees, Hannes/0000-0002-4200-5796					119	3	3	15	61	EMERALD GROUP PUBLISHING LTD	Leeds	Floor 5, Northspring 21-23 Wellington Street, Leeds, W YORKSHIRE, ENGLAND	1460-1060	1758-7115		EUR J INNOV MANAG	Eur. J. Innov. Manag.	DEC 9	2024	27	8
17	J	Yu, X				Yu, Xue			Global Multi-Source Information Fusion Management and Deep Learning Optimization for Tourism: Personalized Location-Based Service	JOURNAL OF ORGANIZATIONAL AND END USER COMPUTING			English	Article						Deep Learning; Information Fusion Management; Location-Based Services; Recommendation System		The purpose is to solve the problems of sparse data information, low recommendation precision and recall rate, and cold start of the current tourism personalized recommendation system. First, a context-based personalized recommendation model (CPRM) is established by using the labeled-LDA (labeled latent Dirichlet allocation) algorithm. The precision and recall of interest point recommendation are…	[Yu, Xue] China Univ Min & Technol, Sch Econ & Management, Xuzhou, Jiangsu, Peoples R China; [Yu, Xue] Anhui Univ Finance & Econ, Sch Art, Bengbu, Anhui, Peoples R China	China University of Mining & Technology; Anhui University of Finance & Economics	Yu, X (corresponding author), China Univ Min & Technol, Sch Econ & Management, Xuzhou, Jiangsu, Peoples R China.;Yu, X (corresponding author), Anhui Univ Finance & Econ, Sch Art, Bengbu, Anhui, Peoples R China.	120081824@aufe.edu.cn							39	4	4	5	53	IGI GLOBAL	HERSHEY	701 E CHOCOLATE AVE, STE 200, HERSHEY, PA 17033-1240 USA	1546-2234	1546-5012		J ORGAN END USER COM	J. Organ. End User Comput.		2022	34	3
18	C	Yang, L; Huang, X			IEEE	Yang, Ling; Huang, Xin			Research on Tourism Resources Management Method Based on Deep Learning and Knowledge Graph	2022 6TH INTERNATIONAL SYMPOSIUM ON COMPUTER SCIENCE AND INTELLIGENT CONTROL, ISCSIC			English	Proceedings Paper	6th International Symposium on Computer Science and Intelligent Control (ISCSIC)	NOV 11-13, 2022	ELECTR NETWORK	Xian Jiaotong Liverpool Univ,Zhejiang Univ,Newcastle Univ,IASED,Processes		GRU; knowledge graph; feature vector; tourism resources		In order to improve the efficiency of tourism resources management and the accuracy of tourism resources recommendation, a personalized recommendation method for tourism resources based on deep learning and knowledge graph was proposed. Firstly, the feature vectors of attractions were represented based on the Node2Vec method in knowledge graph feature learning. Then, the potential feature vectors…	[Yang, Ling; Huang, Xin] Anhui Vocat Coll Grain Engn, Dept Bussiness Adm, 2 Xuelin Rd,High Educ Base, Hefei 230011, Anhui, Peoples R China		Huang, X (corresponding author), Anhui Vocat Coll Grain Engn, Dept Bussiness Adm, 2 Xuelin Rd,High Educ Base, Hefei 230011, Anhui, Peoples R China.	yy847502522@l63.com; huangxin202211@l63.com			Anhui provincial education research in the humanities and social sciences project in 2022: research travel product design from the perspective of interdisciplinary integration [2022AH053105]	Anhui provincial education research in the humanities and social sciences project in 2022: research travel product design from the perspective of interdisciplinary integration	This work is sponsored by Anhui provincial education research in the humanities and social sciences project in 2022: research travel product design from the perspective of interdisciplinary integration. Project approval number: 2022AH053105.		15	0	0	4	9	IEEE COMPUTER SOC	LOS ALAMITOS	10662 LOS VAQUEROS CIRCLE, PO BOX 3014, LOS ALAMITOS, CA 90720-1264 USA			978-1-6654-5488-9				2022
19	C	Souha, A; Benaddi, L; Ouaddi, C; Bouziane, E; Jakimi, A		Serrhini, M; Ghoumid, K		Souha, Adnane; Benaddi, Lamya; Ouaddi, Charaf; Bouziane, El Mahi; Jakimi, Abdeslam			Sketch of a Decision-Support System to Improve the Management of Tourism Destinations	ADVANCES IN SMART MEDICAL, IOT & ARTIFICIAL INTELLIGENCE, VOL 1, ICSMAI 2024	Information Systems Engineering and Management		English	Proceedings Paper	1st International Conference on Smart Medical, IoT and Artificial Intelligence (ICSMAI)	AUG 18-20, 2024	Saidia, MOROCCO			smart tourism destination; decision support system; deep learning; text classification; sentiment analysis		User feedback is a crucial indicator of the success of any tourist destination, as it reflects the level of satisfaction with the services provided in that destination. This paper outlines a deep learning-based approach to creating a decision support system that can help tourism managers in Morocco make better choices to maintain the region's competitiveness and attract more visitors. Our propose…	[Souha, Adnane; Benaddi, Lamya; Ouaddi, Charaf; Bouziane, El Mahi; Jakimi, Abdeslam] UMI Meknes Errachidia, GL ISI Team, Dept Informat FST Errachida, Meknes, Morocco	Moulay Ismail University of Meknes	Souha, A (corresponding author), UMI Meknes Errachidia, GL ISI Team, Dept Informat FST Errachida, Meknes, Morocco.	ad.souha@edu.umi.ac.ma; l.benaddi@edu.umi.ac.ma; c.ouaddi@edu.umi.ac.ma; bouzianeelmahi@gmai1.com; ajakimi@yahoo.fr		OUADDI, Charaf/0000-0002-0829-7326	Ministry of Higher Education, Scientific Research and Innovation; Digital Development Agency (DDA); CNRST of Morocco [Alkhawarizmi/2020/32]	Ministry of Higher Education, Scientific Research and Innovation; Digital Development Agency (DDA); CNRST of Morocco	This work was supported by the Ministry of Higher Education, Scientific Research and Innovation, the Digital Development Agency (DDA), and the CNRST of Morocco (Alkhawarizmi/2020/32).		26	0	0	0	0	SPRINGER INTERNATIONAL PUBLISHING AG	CHAM	GEWERBESTRASSE 11, CHAM, CH-6330, SWITZERLAND	3004-958X		978-3-031-66852-4; 978-3-031-66850-0; 978-3-031-66849-4	Inf Sys Eng Manag			2024	11
20	J	da Silva, FR; Câmara, SF; Pinto, FR; da Costa, FJ; de Freitas, LM; de Oliveira, FGC Jr; De Paula, TM; Soares, MO				da Silva, Felipe Roberto; Camara, Samuel Facanha; Pinto, Francisco Roberto; da Costa, Francisco Jose; de Freitas, Leonardo Martins; de Oliveira Junior, Jose Gilmar Cavalcante; De Paula, Thiago Matheus; Soares, Marcelo Oliveira			Machine learning application to assess deforestation and wildfire levels in protected areas with tourism management	JOURNAL FOR NATURE CONSERVATION			English	Article						Forest; Control policy; Governance; Effectiveness; Management plan; Management board	SUCCESS; BRAZIL; FIRES	This study aims to identify the influence of management plans, management boards and tourism management on the relationship between performance indicators in the management of protected areas and degradation pro-cesses. To understand these relationships, 283 protected areas (PAs) in Brazil were analyzed. The first stage of the research used classification models based on machine learning algorith…	[da Silva, Felipe Roberto; Camara, Samuel Facanha; Pinto, Francisco Roberto; de Freitas, Leonardo Martins; De Paula, Thiago Matheus] Univ Estadual Ceara, PPGA, Bluelab, Fortaleza, CE, Brazil; [da Costa, Francisco Jose] Univ Fed Paraiba, PPGA UFPB, Joao Pessoal, PB, Brazil; [de Oliveira Junior, Jose Gilmar Cavalcante] Univ Fed Alagoas, Maceio, AL, Brazil; [Soares, Marcelo Oliveira] Univ Fed Ceara,…	Universidade Estadual do Ceara; Universidade Federal da Paraiba; Universidade Federal de Alagoas; Universidade Federal do Ceara; Leibniz Association; Leibniz Zentrum fur Marine Tropenforschung (ZMT)	da Silva, FR (corresponding author), Univ Estadual Ceara, PPGA, Bluelab, Fortaleza, CE, Brazil.	felipe.roberto@aluno.uece.br	de Oliveira Soares, Marcelo/AAW-5624-2020; Pinto, Francisco/G-2014-2014; Soares, Marcelo de Oliveira/J-3653-2016; Oliveira, Jose/E-5693-2014	Soares, Marcelo de Oliveira/0000-0002-4696-3166; Oliveira, Jose/0000-0002-1015-9125; Silva, Felipe Roberto da/0000-0001-7902-4432	Conselho Nacional de Desenvolvimento Cientifico e Tecnologico (Research Productivity Fellowship) [313518/2020-3]; PELD Costa Semiarida do Brasil-CSB [442337/2020-5]; CAPES-PRINT; CAPES-AVH; Alexander Von Humboldt Foundation; Fundacao Cearense de Apoio ao	Conselho Nacional de Desenvolvimento Cientifico e Tecnologico (Research Productivity Fellowship); PELD Costa Semiarida do Brasil-CSB; CAPES-PRINT; CAPES-AVH; Alexander Von Humboldt Foundation(Alexander von Humboldt Foundation); Fundacao Cearense de Apoio	We thank the Conselho Nacional de Desenvolvimento Cientifico e Tecnologico (Research Productivity Fellowship No. 313518/2020-3), PELD Costa Semiarida do Brasil-CSB (No. 442337/2020-5), CAPES-PRINT, CAPES-AVH, Alexander Von Humboldt Foundation, and Fundacao Cearense de Apoio ao Desenvolvimento Cientifico e Tecnologico (Chief Scientist Program and PELD) for their financial support. FRS thanks Insti…		59	3	3	0	2	ELSEVIER GMBH	MUNICH	HACKERBRUCKE 6, 80335 MUNICH, GERMANY	1617-1381	1618-1093		J NAT CONSERV	J. Nat. Conserv.	AUG	2023	74
21	J	Yang, S; Li, Q; Jang, D; Kim, J				Yang, Sigeon; Li, Qinglong; Jang, Dongsoo; Kim, Jaekyeong			Deep learning mechanism and big data in hospitality and tourism: Developing personalized restaurant recommendation model to customer decision-making	INTERNATIONAL JOURNAL OF HOSPITALITY MANAGEMENT			English	Article						Restaurant; Recommender system; Aspect -based sentiment analysis; Restaurant reviews; Online platforms	SYSTEM	With the increasing ubiquity of booking restaurants through online platforms, the need for restaurant recommender systems that satisfy individual preferences has grown. Previous studies have found it challenging to reflect preferences in multiple aspects because customers' restaurant experiences were approached from a single aspect. This study proposes a novel personalized recommender system that…	[Yang, Sigeon; Li, Qinglong; Jang, Dongsoo; Kim, Jaekyeong] Kyung Hee Univ, Dept Big Data Analyt, 26 Kyungheedae Ro, Seoul, South Korea; [Kim, Jaekyeong] Kyung Hee Univ, Sch Management, 26 Kyungheedae Ro, Seoul, South Korea	Kyung Hee University; Kyung Hee University	Li, Q (corresponding author), Kyung Hee Univ, Dept Big Data Analyt, 26 Kyungheedae Ro, Seoul, South Korea.	leecy@khu.ac.kr			BK21 FOUR (Fostering Outstanding Universities for Research) - Ministry of Education (MOE, Korea); National Research Foundation of Korea (NRF)	BK21 FOUR (Fostering Outstanding Universities for Research) - Ministry of Education (MOE, Korea)(Ministry of Education (MOE), Republic of Korea); National Research Foundation of Korea (NRF)(National Research Foundation of Korea)	This research was supported by the BK21 FOUR (Fostering Outstanding Universities for Research) funded by the Ministry of Education (MOE, Korea) and National Research Foundation of Korea (NRF) .		59	4	4	22	22	ELSEVIER SCI LTD	London	125 London Wall, London, ENGLAND	0278-4319	1873-4693		INT J HOSP MANAG	Int. J. Hosp. Manag.	AUG	2024	121
22	C	Abeysinghe, S; Manchanayake, I; Samarajeewa, C; Rathnayaka, P; Walpola, MJ; Nawaratne, R; Bandaragoda, T; Alahakoon, D			IEEE	Abeysinghe, Supun; Manchanayake, Isura; Samarajeewa, Chamod; Rathnayaka, Prabod; Walpola, Malaka J.; Nawaratne, Rashmika; Bandaragoda, Tharindu; Alahakoon, Damminda			Enhancing Decision Making Capacity in Tourism Domain Using Social Media Analytics	2018 18TH INTERNATIONAL CONFERENCE ON ADVANCES IN ICT FOR EMERGING REGIONS (ICTER) CONFERENCE PROCEEDINGS	International Conference on Advances in ICT for Emerging Regions		English	Proceedings Paper	18th International Conference on Advances in Ict for Emerging Regions (ICTer)	SEP 26-29, 2018	Univ Colombo, Sch Comp, Colombo, SRI LANKA	IEEE, Sri Lanka Sect,LSEG Technol,Peoples Bank,Natl Sci Fdn,IFS,99x Technol,Board PAC,IEEE Comp Soc	Univ Colombo, Sch Comp	social media; tourism; insights; machine learning		Social media has gained an immense popularity over the last decade. People tend to express opinions about their daily encounters on social media freely. These daily encounters include the places they travelled, hotels or restaurants they have tried and aspects related to tourism in general Since people usually express their true experiences on social media, the expressed opinions contain valuable…	[Abeysinghe, Supun; Manchanayake, Isura; Samarajeewa, Chamod; Rathnayaka, Prabod; Walpola, Malaka J.] Univ Moratuwa, Dept Comp Sci & Engn, Moratuwa, Sri Lanka; [Nawaratne, Rashmika; Bandaragoda, Tharindu; Alahakoon, Damminda] La Trobe Univ, Res Ctr Data Analyt & Cognit, Bundoora, Vic, Australia	University Moratuwa; La Trobe University	Abeysinghe, S (corresponding author), Univ Moratuwa, Dept Comp Sci & Engn, Moratuwa, Sri Lanka.	supun.14@cse.mrt.ac.lk; isura.14@cse.mrt.ac.lk; chamod.14@cse.mrt.ac.lk; prabod.14@cse.mrt.ac.lk; malaka@cse.mrt.ac.lk; B.Nawaratne@latrobe.edu.au; t.bandaragoda@latrobe.edu.au; d.alahakoon@latrobe.edu.au	Nawaratne, Rashmika/N-8893-2018; des, d/GVU-7765-2022	Tennakoon Mudiyanselage, Supun Madusha Bandara Abeysinghe/0000-0001-6054-2432					43	5	5	0	5	IEEE	NEW YORK	345 E 47TH ST, NEW YORK, NY 10017 USA	2377-6854		978-1-5386-7352-2	INT CONF ADV ICT			2018
23	J	Hou, TC				Hou, Tianchen			Research on Management Efficiency and Dynamic Relationship in Intelligent Management of Tourism Engineering Based on Industry 4.0	COMPUTATIONAL INTELLIGENCE AND NEUROSCIENCE			English	Article							ARTIFICIAL-INTELLIGENCE	The digital age of artificial intelligence marks the rapid development of tourism engineering and the gradual improvement of intelligent management theory. This study aims to solve the problems of low efficiency of dynamic relationship analysis and low data utilization in traditional intelligent management methods of tourism engineering. This work studies the dynamic optimization model of tourism…	[Hou, Tianchen] Zhengzhou Univ, Phys Educ Coll, Zhengzhou 450044, Henan, Peoples R China	Henan Sport University; Zhengzhou University	Hou, TC (corresponding author), Zhengzhou Univ, Phys Educ Coll, Zhengzhou 450044, Henan, Peoples R China.	houtianchen@peczzu.edu.cn			study on the high-quality development path of promoting the integration of culture and tourism in the Yellow River Basin in Henan Province [212400410104]	study on the high-quality development path of promoting the integration of culture and tourism in the Yellow River Basin in Henan Province	This work was supported by the study on the high-quality development path of promoting the integration of culture and tourism in the Yellow River Basin in Henan Province (212400410104).		25	0	0	15	61	HINDAWI LTD	LONDON	ADAM HOUSE, 3RD FLR, 1 FITZROY SQ, LONDON, W1T 5HF, ENGLAND	1687-5265	1687-5273		COMPUT INTEL NEUROSC	Comput. Intell. Neurosci.	JAN 22	2022	2022
24	J	Gao, X; Qi, Y; Chai, Y; Lei, C; Wang, JF				Gao, Xuan; Qi, Yuan; Chai, Yong; Lei, Chun; Wang, Jiefei			Tourism Information Management System Using Neural Networks Driven by Particle Swarm Model	COMPUTATIONAL INTELLIGENCE AND NEUROSCIENCE			English	Article							BEHAVIOR; AREA	Based on the concept of smart tourism, this paper designs and implements a tourism management information system based on PSO-optimized NN. The foreground tourism web page of the system adopts DIV + CSS mode for page planning and layout, PHP as the client script language, and SQL server as the database to store and analyze user information. At the same time, the system adds personalized component…	[Gao, Xuan; Chai, Yong; Wang, Jiefei] Univ Sanya, Sch Int Hospitality Management, Sanya 572022, Peoples R China; [Gao, Xuan; Qi, Yuan; Chai, Yong] Univ Sanya, Res Inst Hainan Silk Rd Commercial Civilizat, Sanya 572022, Peoples R China; [Qi, Yuan; Lei, Chun] Univ Sanya, Sch Tourism Management, Sanya 572022, Peoples R China; [Lei, Chun] Taylors Univ, Sch Hospitality Tourism & Event, George Town, Ma…	University of Sanya; University of Sanya; University of Sanya; Taylor's University	Gao, X (corresponding author), Univ Sanya, Sch Int Hospitality Management, Sanya 572022, Peoples R China.;Gao, X (corresponding author), Univ Sanya, Res Inst Hainan Silk Rd Commercial Civilizat, Sanya 572022, Peoples R China.	xuangao@sanyau.edu.cn; yuanqi@sanyau.edu.cn; yongchai@sanyau.edu.cn; chunlei@sanyau.edu.cn; jiefeiwang@sanyau.edu	Wang, Jiefei/AAA-1301-2020	, Xuan/0000-0003-0502-4610	Research Fund for Hainan Federation of Humanities and Social Sciences Circles, Research on the Impact of the Entry of International High-End Hotel Brands on the Promotion of Tourism Image in Hainan and Their Image Fit [HNSK(ZC)21-134]; Research Fund for H	Research Fund for Hainan Federation of Humanities and Social Sciences Circles, Research on the Impact of the Entry of International High-End Hotel Brands on the Promotion of Tourism Image in Hainan and Their Image Fit; Research Fund for Hainan Federation	This study was supported by the Research Fund for Hainan Federation of Humanities and Social Sciences Circles, Research on the Impact of the Entry of International High-End Hotel Brands on the Promotion of Tourism Image in Hainan and Their Image Fit (HNSK(ZC)21-134), and Research Fund for Hainan Federation of Humanities and Social Sciences Circles, Research on Kinetic Energy System Optimization o…		24	0	0	2	25	HINDAWI LTD	LONDON	ADAM HOUSE, 3RD FLR, 1 FITZROY SQ, LONDON, W1T 5HF, ENGLAND	1687-5265	1687-5273		COMPUT INTEL NEUROSC	Comput. Intell. Neurosci.	JUN 13	2022	2022
25	C	Mishra, M; Kala, SM; Amano, T; Yamaguchi, H			ACM	Mishra, Malvika; Kala, Srikant Manas; Amano, Tatsuya; Yamaguchi, Hirozumi			Balancing Privacy and Planning: Using Counterfactuals to Predict and Optimize Tourism in Wakayama City	PROCEEDINGS OF THE 2ND ACM SIGSPATIAL INTERNATIONAL WORKSHOP ON GEO-PRIVACY AND DATA UTILITY FOR SMART SOCIETIES, GEOPRIVACY 2024			English	Proceedings Paper	2nd ACM SIGSPATIAL International Workshop on Geo-Privacy and Data Utility for Smart Societies (GeoPrivacy)	OCT 29-NOV 01, 2024	Atlanta, GA	Oracle,ESRI,Google,Springer,ACM SIGSPATIAL,Apple		Counterfactual Explanations; Destination Prediction; GPS; Machine Learning; Mobility	MOVEMENT PATTERNS; GPS	Leveraging predictive machine learning models on geo-spatial GPS data to analyze and predict tourist visits to Wakayama Castle, this study offers insights for urban design and policy-making. Employing counterfactual analysis, a novel approach in the tourism planning field, helps uncover key factors influencing visitation patterns and provide strategic recommendations for enhancing tourism. The co…	[Mishra, Malvika; Kala, Srikant Manas; Amano, Tatsuya; Yamaguchi, Hirozumi] Osaka Univ, Grad Sch Informat Sci & Technol, Mobile Comp Lab, Osaka, Japan	Osaka University	Mishra, M (corresponding author), Osaka Univ, Grad Sch Informat Sci & Technol, Mobile Comp Lab, Osaka, Japan.	malvikamishra3108@gmail.com; manaskala@ist.osaka-u.ac.jp; t-amano@ist.osaka-u.ac.jp; h-yamagu@ist.osaka-u.ac.jp			Commissioned Research of NICT [22608]	Commissioned Research of NICT	This work was supported in part by The Commissioned Research of NICT, grant number 22608.		17	0	0	0	0	ASSOC COMPUTING MACHINERY	NEW YORK	1601 Broadway, 10th Floor, NEW YORK, NY, UNITED STATES			979-8-4007-1147-3				2024
26	J	Tuomi, A; Tussyadiah, I; Ascencao, MP				Tuomi, Aarni; Tussyadiah, Iis; Ascencao, Mario Passos			Customized language models for tourism management: Implications and future research	ANNALS OF TOURISM RESEARCH			English	Article						Human-computer interaction; Human-artificial intelligence interaction; Artificial intelligence; Chatgpt			[Tuomi, Aarni] Haaga Hel Univ Appl Sci, Helsinki, Finland; [Tuomi, Aarni] Wakayama Univ, Wakayama, Japan; [Tussyadiah, Iis; Ascencao, Mario Passos] Univ Surrey, Guildford, England	Wakayama University; University of Surrey	Tuomi, A (corresponding author), Haaga Hel Univ Appl Sci, Helsinki, Finland.;Tuomi, A (corresponding author), Wakayama Univ, Wakayama, Japan.	aarni.tuomi@haaga-helia.fi; i.tussyadiah@surrey.ac.uk; mariopassos.ascencao@haaga-helia.fi	Tuomi, Aarni/AAK-7168-2021		EU [A81158]	EU(European Union (EU))	Acknowledgement Two authors of this manuscript have received financial support from a part-EU funded project called HosByte: Smart Omnichannel Sales in the Hospitality Industry, project code: A81158.		22	0	0	18	18	PERGAMON-ELSEVIER SCIENCE LTD	OXFORD	THE BOULEVARD, LANGFORD LANE, KIDLINGTON, OXFORD OX5 1GB, ENGLAND	0160-7383	1873-7722		ANN TOURISM RES	Ann. Touris. Res.	JAN	2025	110
27	J	Razali, MN; Manaf, SA; Hanapi, RB; Salji, MR; Chiat, LW; Nisar, K				Razali, Mohd Norhisham; Manaf, Syaifulnizam Abdul; Hanapi, Rozita Binti; Salji, Mohd Rafiz; Chiat, Lee Wen; Nisar, Kashif			Enhancing Minority Sentiment Classification in Gastronomy Tourism: A Hybrid Sentiment Analysis Framework With Data Augmentation, Feature Engineering and Business Intelligence	IEEE ACCESS			English	Article						Business analytics; machine learning; sentiment analysis; tourism industry; data visualization		The gastronomy tourism industry plays an important role in boosting local economies, enhancing the travel experience, and preserving culinary traditions unique to specific places. In this context, comprehending customer sentiments is of paramount importance for business decision-making, menu choice offerings, marketing strategies, and customer service improvements. Traditional sentiment analysis …	[Razali, Mohd Norhisham; Hanapi, Rozita Binti; Chiat, Lee Wen] Univ Teknol MARA Sarawak, Fac Business & Management, Kota Samarahan 94300, Sarawak, Malaysia; [Razali, Mohd Norhisham] Univ Malaysia Sabah, Fac Comp & Informat, Creat Adv Machine Intelligence CAMI Res Ctr, Kota Kinabalu 88400, Sabah, Malaysia; [Manaf, Syaifulnizam Abdul] Univ Putra Malaysia, Fac Comp Sci & Informat Technol, Serdang 43…	Universiti Teknologi MARA; Universiti Malaysia Sabah; Universiti Putra Malaysia; Universiti Teknologi MARA; Swinburne University of Technology	Razali, MN (corresponding author), Univ Teknol MARA Sarawak, Fac Business & Management, Kota Samarahan 94300, Sarawak, Malaysia.;Razali, MN (corresponding author), Univ Malaysia Sabah, Fac Comp & Informat, Creat Adv Machine Intelligence CAMI Res Ctr, Kota Kinabalu 88400, Sabah, Malaysia.	hishamrazali@uitm.edu.my	Manaf, Syaifulnizam/ABD-7063-2021; RAZALI, MOHD NORHISHAM/HKO-5356-2023	Abd Manaf, Syaifulnizam/0009-0000-1211-0504					31	1	1	8	14	IEEE-INST ELECTRICAL ELECTRONICS ENGINEERS INC	PISCATAWAY	445 HOES LANE, PISCATAWAY, NJ 08855-4141 USA	2169-3536			IEEE ACCESS	IEEE Access		2024	12
28	J	Hu, YC				Hu, Yi-Chung			Combination forecasting using multiple attribute decision making in tourism demand	TOURISM REVIEW			English	Article						Artificial intelligence; Multiple attribute decision-making; Forecast combination; Tourism demand; Grey prediction; ????; ???????; ????; ????; ????; demanda turistica; analisis de decision de atributos multiples; Combinacion de pronostico; prediccion gris	NEURAL-NETWORKS; MCDM METHODS; TIME-SERIES; MODEL; ECONOMICS; ARRIVALS	Purpose This study aims to address three important issues of combination forecasting in the tourism context: reducing the restrictions arising from requirements related to the statistical properties of the available data, assessing the weights of single models and considering nonlinear relationships among combinations of single-model forecasts. Design Methodology Approach A three-stage multiple-a…	[Hu, Yi-Chung] Chung Yuan Christian Univ, Dept Business Adm, Taoyuan, Taiwan	Chung Yuan Christian University	Hu, YC (corresponding author), Chung Yuan Christian Univ, Dept Business Adm, Taoyuan, Taiwan.	ychu@cycu.edu.tw	Hu, Yi-Chung/GON-3857-2022	Hu, Yi-Chung/0000-0003-3090-1515	Ministry of Science and Technology, Taiwan [MOST 110-2410-H-033-013-MY2]	Ministry of Science and Technology, Taiwan(Ministry of Science and Technology, Taiwan)	This research is supported by the Ministry of Science and Technology, Taiwan under grant MOST 110-2410-H-033-013-MY2.		59	12	12	5	53	EMERALD GROUP PUBLISHING LTD	BINGLEY	HOWARD HOUSE, WAGON LANE, BINGLEY BD16 1WA, W YORKSHIRE, ENGLAND	1660-5373	1759-8451		TOUR REV	Tour. Rev.	MAY 19	2022	77	3
29	J	Ivanov, SH; Webster, C; Stoilova, E; Slobodskoy, D				Ivanov, Stanislav Hristov; Webster, Craig; Stoilova, Elitza; Slobodskoy, Daniel			Biosecurity, crisis management, automation technologies and economic performance of travel, tourism and hospitality companies - A conceptual framework	TOURISM ECONOMICS			English	Article						artificial intelligence; biosecurity; COVID-19; crisis management; economic performance; pandemic; service automation; service robots	SELF-SERVICE KIOSKS; ARTIFICIAL-INTELLIGENCE; HOTEL INDUSTRY; INFORMATION-TECHNOLOGY; POLITICAL INSTABILITY; ACCEPTANCE MODEL; USER ACCEPTANCE; HIGH TOUCH; HIGH-TECH; IMPACT	The COVID-19 pandemic of 2020 will have a significant influence on travel, tourism and hospitality (TTH) globally. With a massive reduction in tourism globally because of the health crisis, the industry will have to plan recovery and rebuilding of the industry with greater consideration of the biosecurity of customers. A critical element in the reorganisation of the industry will involve the incr…	[Ivanov, Stanislav Hristov] Varna Univ Management, Res, Varna, Bulgaria; [Webster, Craig] Ball State Univ, Dept Management, Muncie, IN 47306 USA; [Stoilova, Elitza] Umni Co, Chatbot Agcy, Sofia, Bulgaria; [Slobodskoy, Daniel] Booking Analyt Co, Sezam24 Com, Prague, Czech Republic	Varna University of Management; Ball State University	Ivanov, SH (corresponding author), Varna Univ Management, Dept Tourism, 13A Oborishte St, Varna 9000, Bulgaria.	stanislav.ivanov@vumk.eu	Ivanov, Stanislav/D-7692-2012	Ivanov, Stanislav/0000-0002-6851-5823					166	64	67	11	118	SAGE PUBLICATIONS LTD	LONDON	1 OLIVERS YARD, 55 CITY ROAD, LONDON EC1Y 1SP, ENGLAND	1354-8166	2044-0375		TOURISM ECON	Tour. Econ.	FEB	2022	28	1
30	J	Sánchez-Franco, MJ; Rey-Tienda, S				Sanchez-Franco, Manuel J.; Rey-Tienda, Sierra			The role of user-generated content in tourism decision-making: an exemplary study of Andalusia, Spain	MANAGEMENT DECISION			English	Article						Hotel; Data visualising techniques; Natural language processing; Topic modelling; Andalusia	SUPPLY CHAIN RESILIENCE; ORGANIZATIONAL RESILIENCE; SOCIAL ENTREPRENEURSHIP; BUSINESS MODELS; PURPOSE; SUSTAINABILITY; MANAGEMENT; OPPORTUNITIES; EXPERIENCE; INNOVATION	PurposeThis research proposes to organise and distil this massive amount of data, making it easier to understand. Using data mining, machine learning techniques and visual approaches, researchers and managers can extract valuable insights (on guests' preferences) and convert them into strategic thinking based on exploration and predictive analysis. Consequently, this research aims to assist hotel…	[Sanchez-Franco, Manuel J.] Univ Seville, Dept Business Adm & Mkt, Seville, Spain; [Rey-Tienda, Sierra] Loyola Univ Andalusia, Dept Business Management, Cordoba, Spain	University of Sevilla; Universidad Loyola Andalucia	Sánchez-Franco, MJ (corresponding author), Univ Seville, Dept Business Adm & Mkt, Seville, Spain.	majesus@us.es	Rey-Tienda, Sierra/HMD-1911-2023; SANCHEZ-FRANCO, MANUEL J./E-6733-2010	Rey-Tienda, Sierra/0009-0006-4324-0575; SANCHEZ-FRANCO, MANUEL J./0000-0002-8042-3550	Junta de Andalucia [US-1380960]	Junta de Andalucia(Junta de Andalucia)	The authors are grateful to the Junta de Andalucia for funding the research (Project I + D + i FEDER Andalucia, 2014-2020, US-1380960). The authors thank Jason Kessler (creator of Scattertext) for his expertise and assistance throughout all aspects of Scattertext and for his help in understanding its functionality.		80	3	3	9	32	EMERALD GROUP PUBLISHING LTD	Leeds	Floor 5, Northspring 21-23 Wellington Street, Leeds, W YORKSHIRE, ENGLAND	0025-1747	1758-6070		MANAGE DECIS	Manag. Decis.	JUL 5	2024	62	7
31	C	Smirnov, A; Kashevnik, A; Shilov, N; Mikhailov, S; Gusikhin, O; Martinez, H		Gusikhin, O; Helfert, M		Smirnov, Alexander; Kashevnik, Alexey; Shilov, Nikolay; Mikhailov, Sergei; Gusikhin, Oleg; Martinez, Harry			Intelligent Content Management System for Tourism Smart Mobility: Approach and Cloud-based Android Application	PROCEEDINGS OF THE 5TH INTERNATIONAL CONFERENCE ON VEHICLE TECHNOLOGY AND INTELLIGENT TRANSPORT SYSTEMS (VEHITS 2019)			English	Proceedings Paper	5th International Conference on Vehicle Technology and Intelligent Transport Systems (VEHITS)	MAY 03-05, 2019	Heraklion, GREECE			Smart Vehicle; Connected Vehicle; Artificial Intelligence; Smart Mobility; Tourism; Recommendations	INFORMATION	Intelligent content management systems have become more popular over the last few years in the tourism industry due to the significantly increasing impact on revenue. Such systems are the part of the smart mobility concept. Smart mobility allows tourists to become more comfortable with transportation in an unknown city by providing interesting information about places seen during their trip. Trad…	[Smirnov, Alexander; Kashevnik, Alexey; Shilov, Nikolay; Mikhailov, Sergei] SPIIRAS, 39,14 Line, St Petersburg 199178, Russia; [Gusikhin, Oleg; Martinez, Harry] Ford Motor Co, Res & Adv Engn, 20300 Rotunda Dr, Dearborn, MI 48121 USA	Russian Academy of Sciences; St. Petersburg Federal Research Center of the Russian Academy of Sciences; Ford Motor Company	Smirnov, A (corresponding author), SPIIRAS, 39,14 Line, St Petersburg 199178, Russia.		Mikhailov, Sergei/T-9042-2017; Kashevnik, Alexey/A-8262-2012; Shilov, Nikolay/A-7559-2012		Ford University Research Program	Ford University Research Program	The paper is due to the project sponsored by the Ford University Research Program.		23	4	6	0	9	SCITEPRESS	SETUBAL	AV D MANUELL, 27A 2 ESQ, SETUBAL, 2910-595, PORTUGAL			978-989-758-374-2				2019
32	C	Xie, HJ		Xia, Q; Zhou, H		Xie, Huijuan			The Application of RSA Encryption Algorithm in the Hainan Rural Tourism Management Platform	PROCEEDINGS OF THE 2017 2ND INTERNATIONAL CONFERENCE ON EDUCATION, SPORTS, ARTS AND MANAGEMENT ENGINEERING (ICESAME 2017)	Advances in Social Science Education and Humanities Research		English	Proceedings Paper	2nd International Conference on Education, Sports, Arts and Management Engineering (ICESAME)	APR 29-30, 2017	Zhengzhou, PEOPLES R CHINA			RSA Algorithm; Prime; Data Security; Rural Tourism		With the development of information technology, such as Big Data, O2O, Cloud Computing, the Internet of Things and Artificial Intelligence, the Hainan Rural Tourism Wisdom Management Platform should provide complete, safe and available information resources. How to make the information correctly generated, stored and transmitted has become very important. The Hainan Rural Tourism Wisdom Managemen…	[Xie, Huijuan] Hainan Coll Econ & Business, Haikou 571127, Hainan, Peoples R China	Hainan College of Economics & Business	Xie, HJ (corresponding author), Hainan Coll Econ & Business, Haikou 571127, Hainan, Peoples R China.	360088369@qq.com			Construction of Evaluation Index System of Hainan Rural Tourism Intelligent Management Platform [HNSK(JD)16-24]	Construction of Evaluation Index System of Hainan Rural Tourism Intelligent Management Platform	In this paper, the research was sponsored by the Construction of Evaluation Index System of Hainan Rural Tourism Intelligent Management Platform (Project No.HNSK(JD)16-24).		9	0	0	1	6	ATLANTIS PRESS	PARIS	29 AVENUE LAVMIERE, PARIS, 75019, FRANCE	2352-5398		978-94-6252-344-9	ADV SOC SCI EDUC HUM			2017	123
33	C	Chen, NC; Xie, J; Tinn, P; Alonso, L; Nagakura, T; Larson, K		Janssen, P; Loh, P; Raonic, A; Schnabel, MA		Chen, Nai Chun; Xie, Jenny; Tinn, Phil; Alonso, Luis; Nagakura, Takehiko; Larson, Kent			DATA MINING TOURISM PATTERNS Call Detail Records as Complementary Tools for Urban Decision Making	PROCEEDINGS OF THE 22ND INTERNATIONAL CONFERENCE ON COMPUTER-AIDED ARCHITECTURAL DESIGN RESEARCH IN ASIA (CAADRIA 2017): PROTOCOLS, FLOWS AND GLITCHES			English	Proceedings Paper	22nd CAADRIA Annual International Conference on Computer-Aided Architectural Design Research in Asia (CAADRIA)	APR 05-08, 2017	Xian Jiaotong Liverpool Univ, Dept Architecture, Suzhou, PEOPLES R CHINA	Assoc Comp Aided Architectural Design Res Asia	Xian Jiaotong Liverpool Univ, Dept Architecture	Machine Learning; Call Detail Record; Original-Destination Matrix; Urban Design Tool		In this study we show how Call Detail Record (CDR) can be used to better understand the travel patterns of visitors. We show how Origin-Destination (OD) Interactive Maps can provide transportation information through CDR. We then use aggregation of CDR to show the differences between the travel patterns of visitors from different countries and of different lengths of stay. We also show that visit…	[Chen, Nai Chun; Tinn, Phil; Alonso, Luis; Nagakura, Takehiko; Larson, Kent] MIT, Cambridge, MA 02139 USA; [Xie, Jenny] Wellesley Coll, Wellesley, MA 02181 USA	Massachusetts Institute of Technology (MIT); Wellesley College	Chen, NC (corresponding author), MIT, Cambridge, MA 02139 USA.	naichun@mit.edu; jxie2@wellesley.edu; ptinn@mit.edu; alonsolp@mit.edu; takehiko@mit.edu; kll@mit.edu							17	1	1	0	5	CAADRIA-ASSOC COMPUTER-AIDED ARCHITECTURAL DESIGN RESEARCH ASIA	HONG KONG	CHINESE UNIV HONG KONG, DEPT ARCHITECTURE, SHATIN N T,, HONG KONG, 00000, PEOPLES R CHINA			978-988-19026-8-9				2017
34	J	Ai, R; Song, JW; Xie, XW				Ai, Rong; Song, Jianwei; Xie, Xiaowei			Intelligent entertainment robots based on path navigation planning in tourism intelligent services and user entertainment experience analysis	ENTERTAINMENT COMPUTING			English	Article						Path navigation planning; Intelligent entertainment robot; Tourism intelligent service; User entertainment experience	OPTIMIZATION	With the development of tourism industry, users have higher and higher demand for travel experience, while traditional tourism services can no longer meet the needs of users. Therefore, as an innovative tourism service mode, intelligent entertainment robots have broad application prospects. This paper proposes a design scheme of intelligent entertainment robot based on path navigation planning. B…	[Ai, Rong; Song, Jianwei] Handan Univ, Inst Cultural Ind, Econ & Management Coll, Handan 056000, Peoples R China; [Xie, Xiaowei] State Grid Handan Power Supply Co, Handan 056000, Peoples R China	Handan University	Ai, R (corresponding author), Handan Univ, Inst Cultural Ind, Econ & Management Coll, Handan 056000, Peoples R China.	airong19842020@163.com	xie, xiaowei/JXL-5886-2024						15	0	0	10	10	ELSEVIER SCI LTD	London	125 London Wall, London, ENGLAND	1875-9521	1875-953X		ENTERTAIN COMPUT	Entertain. Comput.	JAN	2025	52
35	C	Chen, CL; Xue, Q			IEEE Comp Soc	Chen, Chuling; Xue, Qin			Using Big Data and Empirical Analysis to Optimize The Decision-Making of Smart City Tourism Logistics Service System	2022 ASIA CONFERENCE ON ALGORITHMS, COMPUTING AND MACHINE LEARNING (CACML 2022)			English	Proceedings Paper	Asia Conference on Algorithms, Computing and Machine Learning (CACML))	MAR 25-27, 2022	ELECTR NETWORK	Int Soc Appl Comp,Tech Inst Engineers		tourism logistics; servzce quality; operator satisfaction; logistics service planning	QUALITY	As an emerging service industry, tourism logistics can affect the response of the city's major business operators. Tourism cities can improve logistics services through system optimization, so as to achieve operator satisfaction. This research uses urban big data, through data collection, questionnaire survey, empirical analysis using SPSS and Amos software, etc., to explore the components of tou…	[Chen, Chuling; Xue, Qin] Guangdong Univ Finance & Econ, Sch Culture Tourism & Geog, Guangzhou, Guangdong, Peoples R China	Guangdong University of Finance & Economics	Xue, Q (corresponding author), Guangdong Univ Finance & Econ, Sch Culture Tourism & Geog, Guangzhou, Guangdong, Peoples R China.	642213148@qq.com; helmsman68@126.com	chen, yuling/JMQ-4121-2023						10	0	0	3	16	IEEE COMPUTER SOC	LOS ALAMITOS	10662 LOS VAQUEROS CIRCLE, PO BOX 3014, LOS ALAMITOS, CA 90720-1264 USA			978-1-6654-8290-5				2022
36	J	Hao, YC; Zheng, LL				Hao, Yingcheng; Zheng, Lili			Application of slam method in big data rural tourism management in dynamic scene	SOFT COMPUTING			English	Article; Early Access						Dynamic scene; Visual features; Computer vision; Big data	TECHNOLOGY	Under the background of the rapid development of science and technology, technologies in many fields are advancing accordingly. The same artificial intelligence and computer vision technologies are also constantly being updated. Similarly, in vision On the basis of, positioning and mapping (technology is the core technology for mobile robots to complete the intelligentization) has also had a grea…	[Hao, Yingcheng] Tangshan Polytech Coll, Dept Management Engn, Tangshan 063000, Hebei, Peoples R China; [Zheng, Lili] Tangshan Univ, Coll Ecommerce, Tangshan 063000, Hebei, Peoples R China	Tangshan Polytechnic University; Tangshan University	Zheng, LL (corresponding author), Tangshan Univ, Coll Ecommerce, Tangshan 063000, Hebei, Peoples R China.	baixue_264@163.com							15	0	0	7	26	SPRINGER	NEW YORK	ONE NEW YORK PLAZA, SUITE 4600, NEW YORK, NY, UNITED STATES	1432-7643	1433-7479		SOFT COMPUT	Soft Comput.	2023 JUN 5	2023
37	J	Shi, YQ; Liu, Z; Chen, L; Li, W				Shi, Yongqiang; Liu, Zheng; Chen, Li; Li, Wei			Research on intelligent tourism management based on wireless network development	JOURNAL OF INTELLIGENT & FUZZY SYSTEMS			English	Article						Wireless network; intelligent tourism; recommendation; tour route	TECHNOLOGY; INTERNET; SYSTEM	With the development of China's Internet, wireless network technology has been upgraded, and the rapid development of wireless network technology requires more advanced intelligent information processing technology to match. Therefore, based on the development of wireless network, this paper proposes intelligent tourism Management scheme. Firstly, the Wide & Deep Learning exploratory tourism rout…	[Shi, Yongqiang; Liu, Zheng; Chen, Li] Taiyuan Univ, Dept Tourism & Management, Taiyuan, Shanxi, Peoples R China; [Li, Wei] Huangshan Global Geopk Management Comm, Huangshan, Anhui, Peoples R China	Taiyuan University	Li, W (corresponding author), Huangshan Global Geopk Management Comm, Huangshan, Anhui, Peoples R China.	hvhnx044@163.com							20	4	4	1	17	IOS PRESS	AMSTERDAM	NIEUWE HEMWEG 6B, 1013 BG AMSTERDAM, NETHERLANDS	1064-1246	1875-8967		J INTELL FUZZY SYST	J. Intell. Fuzzy Syst.		2019	37	5
38	J	Kim, K; Park, OJ; Yun, S; Yun, H				Kim, Kun; Park, Oun-joung; Yun, Seunghyun; Yun, Haejung			What makes tourists feel negatively about tourism destinations? Application of hybrid text mining methodology to smart destination management	TECHNOLOGICAL FORECASTING AND SOCIAL CHANGE			English	Article						Smart tourism; Smart destination management; Sentiment analysis; Text mining; User-generated content (UGC)	WORD; FOUNDATIONS; KNOWLEDGE; NETWORKS; MACAO; WEB	Recently, the Internet has brought a big change in tourists' behavior patterns. Travelers not only reserve hotels and airline tickets online, but also exchange travel information and descriptions of pleasant or unpleasant travel experiences through online review sites and personal travel blogs. In spite of the increasing use of online channels, application of online text data has been limited sin…	[Kim, Kun; Yun, Seunghyun] Yonsei Univ, Seoul, South Korea; [Park, Oun-joung] Jeju Natl Univ, Dept Tourism Management, Jeju Si, South Korea; [Yun, Haejung] Ewha Womans Univ, Coll Sci & Ind Convergence, Dept Int Off Adm, Seoul, South Korea	Yonsei University; Jeju National University; Ewha Womans University	Yun, H (corresponding author), Ewha Womans Univ, Coll Sci & Ind Convergence, Dept Int Off Adm, Seoul, South Korea.	kapple0914@gmail.com; ounj.park@gmail.com; rogve22@gmail.com; yunhj@ewha.ac.kr	Yun, Haejung/R-7767-2019	Yun, Haejung/0000-0002-8977-2044					41	105	110	24	277	ELSEVIER SCIENCE INC	NEW YORK	STE 800, 230 PARK AVE, NEW YORK, NY 10169 USA	0040-1625	1873-5509		TECHNOL FORECAST SOC	Technol. Forecast. Soc. Chang.	OCT	2017	123
39	J	Li, PZ; Xiao, X; Seekamp, E				Li, Peizhe; Xiao, Xiao; Seekamp, Erin			Climate adaptation planning for cultural heritages in coastal tourism destinations: A multi-objective optimization approach	TOURISM MANAGEMENT			English	Article						Decision support tools; Historic buildings; Cost-efficiency; Cultural resource management; Historic preservation; Machine learning; Climate change	RESOURCES; IMPACTS; CONSERVATION; SUPPORT; SCIENCE; SITES; TOOL	Substantial climate change impacts threaten the persistence of cultural resources globally. The need exists for conceptualizing decision support tools that focus on quantifying and optimizing the managerial priorities to leverage historic preservation and adaptation actions that enhance the continuity of heritage values and sites. Informed by the Structured Decision Making (SDM) approach, this st…	[Li, Peizhe; Xiao, Xiao] Arizona State Univ, Sch Community Resources & Dev, 411 N Cent Ave,Suite 550, Phoenix, AZ 85004 USA; [Li, Peizhe; Xiao, Xiao] Hainan Univ, Hainan Univ Arizona State Univ Joint Int Tourism, 58 Renmin Rd, Haikou 570004, Hainan, Peoples R China; [Seekamp, Erin] North Carolina State Univ, Dept Pk Recreat & Tourism Management, Box 8004,Biltmore Hall, Raleigh, NC 27695 USA	Arizona State University; Arizona State University-Downtown Phoenix; Hainan University; North Carolina State University	Xiao, X (corresponding author), Arizona State Univ, Sch Community Resources & Dev, 411 N Cent Ave,Suite 550, Phoenix, AZ 85004 USA.	peizhel1@asu.edu; xiao.xiao.7@asu.edu; elseekam@ncsu.edu	Li, Peizhe/IQR-5447-2023; Xiao, Xiao/Z-1199-2019	Seekamp, Erin/0000-0001-5082-1921; Li, Peizhe/0000-0003-3102-2897; Xiao, Xiao/0000-0001-5124-0985	U.S. Geological Survey through the National Climate Change and Wildlife Science Center; Department of Interior Southeast Climate Adaptation Science Center [G15AP00141]; National Park Service Climate Change Response Program through U.S. Department of Inter	U.S. Geological Survey through the National Climate Change and Wildlife Science Center; Department of Interior Southeast Climate Adaptation Science Center; National Park Service Climate Change Response Program through U.S. Department of Interior Inter-Age	The data used in this paper was supported by the U.S. Geological Survey (https:// www.usgs.gov) through the National Climate Change and Wildlife Science Center (https://casc.usgs.gov/) and the Department of Interior Southeast Climate Adaptation Science Center (https://globalchange.ncsu.edu/secsc/) through grant agreement G15AP00141 (project title: Connecting Landscape Adaptation and National Cult…		43	17	17	10	81	ELSEVIER SCI LTD	OXFORD	THE BOULEVARD, LANGFORD LANE, KIDLINGTON, OXFORD OX5 1GB, OXON, ENGLAND	0261-5177	1879-3193		TOURISM MANAGE	Tourism Manage.	FEB	2022	88
40	J	Wang, N				Wang, Ning			Using the Fuzzy Method and Multi-Criteria Decision Making to Analyze the Impact of Digital Economy on Urban Tourism	INTERNATIONAL JOURNAL OF COMPUTATIONAL INTELLIGENCE SYSTEMS			English	Article						Decision-making; Digital economy; Fuzzy; Multi-criteria; Urban tourism		Urban tourism promotes the economic growth of a nation around the year through direct and indirect incomes. In recent years, the digital economy has impacted the growth of urban tourism through hassle-free money transactions and expenditures. This article, therefore, introduces a Multi-Criteria Fuzzy-based Decision-Making Method (MCFDMM) for validating the impact of the digital economy impact ove…	[Wang, Ning] Changchun Finance Coll, Sch Finance, Changchun 130124, Peoples R China; [Wang, Ning] Jilin Sci & Technol Finance Res Ctr, Changchun 130124, Peoples R China		Wang, N (corresponding author), Changchun Finance Coll, Sch Finance, Changchun 130124, Peoples R China.;Wang, N (corresponding author), Jilin Sci & Technol Finance Res Ctr, Changchun 130124, Peoples R China.	wangning_vip@outlook.com			Provincial Social Science Foundation of Jilin Province, China	Provincial Social Science Foundation of Jilin Province, China	No Statement Available		30	0	0	4	7	SPRINGERNATURE	LONDON	CAMPUS, 4 CRINAN ST, LONDON, N1 9XW, ENGLAND	1875-6891	1875-6883		INT J COMPUT INT SYS	Int. J. Comput. Intell. Syst.	MAY 21	2024	17	1
41	C	Boukherouk, M; Ed-dali, R; Dbibirha, Y		Katsoni, V; Spyriadis, T		Boukherouk, Mohamed; Ed-dali, Rachid; Dbibirha, Youness			Sharing Tourism and Its Impact on Hospitality Management in Essaouira: Analysis of the Evolution of Booking.com and Airbnb	CULTURAL AND TOURISM INNOVATION IN THE DIGITAL ERA	Springer Proceedings in Business and Economics		English	Proceedings Paper	6th International Conference of the International-Association-of-Cultural-and-Digital-Tourism (IACuDiT) - Cultural and Tourism Innovation - Integration and Digital Transition	JUN 12-15, 2019	Athens, GREECE	Int Assoc Cultural & Digital Tourism			SOCIAL MEDIA; EXPERIENCES	Social networks jostle the terms of tourism communication. The presence of hotels on the web was, first, disrupted by the arrival of TripAdvisor and Booking. com. Recently, the platform of Airbnb has become a giant in the field of communication and the sales of accommodation. Faced with this reality, the traditional types of accommodations must adapt to a competitive environment where the client-…	[Boukherouk, Mohamed; Ed-dali, Rachid] Sch Technol, Lab Rech Sci Appl Environm & Dev Durable SAEDD, Essaouira, Morocco; [Boukherouk, Mohamed; Ed-dali, Rachid] Univ Cadi Ayyad Marrakech, Marrakech, Morocco; [Dbibirha, Youness] Fac Lettres Human Sci, Lab Dynam Espaces & Soc LADES, Mohammadia, Morocco; [Dbibirha, Youness] Univ Hassan 2, Casablanca, Morocco	Cadi Ayyad University of Marrakech; Hassan II University of Casablanca	Boukherouk, M (corresponding author), Sch Technol, Lab Rech Sci Appl Environm & Dev Durable SAEDD, Essaouira, Morocco.;Boukherouk, M (corresponding author), Univ Cadi Ayyad Marrakech, Marrakech, Morocco.		EDDALI, RACHID/LTD-7140-2024; DBIBIRHA, Younes/AAI-9118-2021; BOUKHEROUK, MOHAMED/HLQ-1537-2023	Boukherouk, Mohamed/0000-0001-8041-2694; ED-DALI, RACHID/0009-0000-8440-208X; DBIBIRHA, Younes/0000-0001-5816-7717					41	3	3	2	13	SPRINGER INTERNATIONAL PUBLISHING AG	CHAM	GEWERBESTRASSE 11, CHAM, CH-6330, SWITZERLAND	2198-7246	2198-7254	978-3-030-36342-0; 978-3-030-36341-3	SPR PROC BUS ECON			2020
42	J	Xiao, X; Li, PZ; Seekamp, E				Xiao, Xiao; Li, Peizhe; Seekamp, Erin			Sustainable Adaptation Planning for Cultural Heritage in Coastal Tourism Destinations Under Climate Change: A Mixed-Paradigm of Preservation and Conservation Optimization	JOURNAL OF TRAVEL RESEARCH			English	Article						Climate adaptation planning; cultural heritage; Sustainable Development Goals (SDGs); national parks; preservation optimization; coastal tourism destinations	RESOURCES; UNCERTAINTY; IMPACTS	Fragmented guidance and unbalanced climate adaptation efforts for tangible and intangible cultural heritage are challenging the long-term sustainability of coastal tourism destinations. Conceptualizing and quantifying adaptation paradigms that optimize cultural heritage preservation from multi-faceted perspectives under fiscal constraints is highly prioritized by coastal tourism destinations. Inf…	[Xiao, Xiao; Li, Peizhe] Arizona State Univ, Phoenix, AZ USA; [Seekamp, Erin] North Carolina State Univ, Raleigh, NC USA; [Xiao, Xiao] Arizona State Univ, Sch Community Resources & Dev, 411 N Cent Ave,Suite 550, Phoenix, AZ 85004 USA	Arizona State University; Arizona State University-Downtown Phoenix; North Carolina State University; Arizona State University; Arizona State University-Downtown Phoenix	Xiao, X (corresponding author), Arizona State Univ, Sch Community Resources & Dev, 411 N Cent Ave,Suite 550, Phoenix, AZ 85004 USA.	xiao.xiao.7@asu.edu	Xiao, Xiao/Z-1199-2019; Li, Peizhe/IQR-5447-2023	Seekamp, Erin/0000-0001-5082-1921; Li, Peizhe/0000-0003-3102-2897; Xiao, Xiao/0000-0001-5124-0985	United States Geological Survey [G22ACOO273]; U.S. Department of Interior Inter-Agency [P17AC00794]	United States Geological Survey(United States Geological Survey); U.S. Department of Interior Inter-Agency	The author(s) disclosed receipt of the following financial support for the research, authorship, and/or publication of this article: The project described in this publication was supported by Grant or Cooperative Agreement No. [G22ACOO273] (project title: Examining Diverse Management Objectives and Broadening Stakeholder Engagement for Climate Adaptation Planning of Historic Structures within the…		45	8	8	20	100	SAGE PUBLICATIONS INC	THOUSAND OAKS	2455 TELLER RD, THOUSAND OAKS, CA 91320 USA	0047-2875	1552-6763		J TRAVEL RES	J. Travel Res.	JAN	2024	63	1
43	C	Bodkhe, U; Bhattacharya, P; Tanwar, S; Tyagi, S; Kumar, N; Obaidat, MS		Obaidat, MS; Mi, Z; Hsiao, KF; Nicopolitidis, P; CascadoCaballero, D		Bodkhe, Umesh; Bhattacharya, Pronaya; Tanwar, Sudeep; Tyagi, Sudhanshu; Kumar, Neeraj; Obaidat, M. S.			BloHosT: Blockchain Enabled Smart Tourism and Hospitality Management	PROCEEDING OF THE 2019 INTERNATIONAL CONFERENCE ON COMPUTER, INFORMATION AND TELECOMMUNICATION SYSTEMS (IEEE CITS 2019)	International Conference on Computer Information and Telecommunication Systems		English	Proceedings Paper	8th International Conference on Computer, Information and Telecommunication Systems (CITS)	AUG 28-31, 2019	Beijing, PEOPLES R CHINA	IEEE,IEEE Commun Soc		Tourism; Blockchain; TeDL; Security; BloHosT		In the era of Industry 4.0, e-tourism uses bulk of digital payments through applications supported by heterogeneous payment gateways. These heterogeneous payment gateways open the doors for the attackers to perform malicious activities such as-hacking of wallet accounts, identity theft, attacks on payment clearance cycles. In e-tourism, financial data is maintained in a centralized cloud server, …	[Bodkhe, Umesh; Bhattacharya, Pronaya; Tanwar, Sudeep] Nirma Univ, Inst Technol, Dept Comp Engn, Ahmadabad, Gujarat, India; [Tyagi, Sudhanshu; Kumar, Neeraj] Thapar Inst Engn & Technol Deemed Univ, Patiala, Punjab, India; [Obaidat, M. S.] Univ Jordan, King Abdullah II Sch IT, Amman, Jordan; [Obaidat, M. S.] Nazarbayev Univ, Astana, Kazakhstan; [Obaidat, M. S.] Univ Sci & Technol Beijing, Beijing,…	Nirma University; Thapar Institute of Engineering & Technology; University of Jordan; Nazarbayev University; University of Science & Technology Beijing	Bodkhe, U (corresponding author), Nirma Univ, Inst Technol, Dept Comp Engn, Ahmadabad, Gujarat, India.	umesh.bodkhe@nirmauni.ac.in; pronoya.bhattacharya@nirmauni.ac.in; sudeep.tanwar@nirmauni.ac.in; sudhanshutyagi123@gmail.com; neeraj.kumar@thapar.edu; m.s.obaidat@ieee.org	Bhattacharya, Pronaya/Y-4475-2019; Tyagi, Sudhanshu/AAC-3009-2021; Tanwar, Sudeep/AAI-6709-2020; Obaidat, Mohammad/KBC-2747-2024; Kumar, Neeraj/L-3500-2016; Tanwar, Sudeep/M-8515-2018	Tyagi, Sudhanshu/0000-0002-2989-3098; Tanwar, Sudeep/0000-0002-1776-4651; Bhattacharya, Dr. Pronaya/0000-0002-1206-2298; Kumar, Neeraj/0000-0002-3020-3947					16	64	68	3	6	IEEE	NEW YORK	345 E 47TH ST, NEW YORK, NY 10017 USA	2326-2338		978-1-5386-4088-3	INT CONF COMP INFO			2019
44	J	Zhou, ZY; Li, T; Liu, C; Zhou, Y; Li, P; Wen, S				Zhou, Zhongyuan; Li, Ting (Tina); Liu, Chang; Zhou, Yang; Li, Ping; Wen, Si			Why do social media users follow tourism-related posts? Roles of bloggers and posts in trip planning	INDUSTRIAL MANAGEMENT & DATA SYSTEMS			English	Article						Social media marketing; Tourism marketing; Social media advertising; Online consumer behavior; Online marketing	ONLINE CONSUMER REVIEWS; GENERATED CONTENT; INFORMATION QUALITY; PURCHASE INTENTIONS; SERIAL INDEPENDENCE; SOURCE CREDIBILITY; BRAND ENGAGEMENT; DECISION-MAKING; EFFICIENT TESTS; PERCEIVED VALUE	PurposeMore people share their tourism experiences on social media today than in the past, and as a result, more people follow these posts in their trip planning. However, studies into tourists' intention to follow such posts are scarce. Therefore, this study investigates the antecedents influencing social media users' intentions to follow tourism-related posts (TRPs) when planning their trips.De…	[Zhou, Zhongyuan; Li, Ting (Tina); Zhou, Yang; Li, Ping] Hainan Univ, Hainan Univ Arizona State Univ Joint Int Tourism C, Haikou, Peoples R China; [Liu, Chang] Grand Hyatt Guangzhou, Dept Mkt, Guangzhou, Peoples R China; [Liu, Chang] Hudson Recruitment, Dept Financial IT, Guangzhou, Peoples R China; [Wen, Si] Sichuan Int Studies Univ, Chongqing, Peoples R China	Hainan University; Sichuan International Studies University	Li, T (corresponding author), Hainan Univ, Hainan Univ Arizona State Univ Joint Int Tourism C, Haikou, Peoples R China.	liting@hainanu.edu.cn		Li, Ting (Tina)/0000-0001-8188-3770; Liu, Chang/0000-0001-9107-4432	Funding: Hainan Provincial Philosophy and Social Science Project [Ref. No: HNSK(YB)22-25]. The Education Department of Hainan Province [Ref. No: Hnkyzc2023-4]. The specific research fund of The Innovation Platform for Academicians of Haina; Hainan Provinc	Funding: Hainan Provincial Philosophy and Social Science Project [Ref. No: HNSK(YB)22-25]. The Education Department of Hainan Province [Ref. No: Hnkyzc2023-4]. The specific research fund of The Innovation Platform for Academicians of Haina; Hainan Provinc	Hainan Provincial Philosophy and Social Science Project [Ref. No: HNSK(YB)22-25]. The Education Department of Hainan Province [Ref. No: Hnkyzc2023-4]. The specific research fund of The Innovation Platform for Academicians of Hainan Province.		143	4	4	14	52	EMERALD GROUP PUBLISHING LTD	Leeds	Floor 5, Northspring 21-23 Wellington Street, Leeds, W YORKSHIRE, ENGLAND	0263-5577	1758-5783		IND MANAGE DATA SYST	Ind. Manage. Data Syst.	DEC 4	2023	123	12
45	J	Subying, C; Yoopetch, C				Subying, Chatarin; Yoopetch, Chanin			A Bibliometric Review of Revenue Management in the Tourism and Hospitality Industry, 1989-2021	SUSTAINABILITY			English	Review						revenue management; yield management; bibliometric review; tourism; hospitality	AIRLINE YIELD-MANAGEMENT; SEAT ALLOCATION; MODEL; OPTIMIZATION; OVERBOOKING; SCIENCE; SALES	This study aimed to examine the conceptual development, trends, and intellectual structures in the literature on revenue management in the tourism and hospitality industry. This study applied the bibliometric review method to analyze 1165 Scopus-indexed documents. Descriptive analyses, citation analysis, co-citation analysis, and keyword co-occurrence analysis were used to investigate the intelle…	[Subying, Chatarin; Yoopetch, Chanin] Mahidol Univ, Coll Management, Bangkok 10400, Thailand	Mahidol University	Yoopetch, C (corresponding author), Mahidol Univ, Coll Management, Bangkok 10400, Thailand.	chatarin.sub@gmail.com; chanin.yoo@mahidol.ac.th	Yoopetch, Chanin/ABD-5811-2021	Yoopetch, Chanin/0000-0002-2586-4863	National Research Council of Thailand (NRCT)	National Research Council of Thailand (NRCT)(National Research Council of Thailand (NRCT))	This project is funded by National Research Council of Thailand (NRCT).		73	1	1	9	23	MDPI	BASEL	ST ALBAN-ANLAGE 66, CH-4052 BASEL, SWITZERLAND		2071-1050		SUSTAINABILITY-BASEL	Sustainability	OCT	2023	15	20
46	J	Thumrongvut, P; Sethanan, K; Pitakaso, R; Jamrus, T; Golinska-Dawson, P				Thumrongvut, Pawnrat; Sethanan, Kanchana; Pitakaso, Rapeepan; Jamrus, Thitipong; Golinska-Dawson, Paulina			Application of Industry 3.5 approach for planning of more sustainable supply chain operations for tourism service providers	INTERNATIONAL JOURNAL OF LOGISTICS-RESEARCH AND APPLICATIONS			English	Article						Tourism industry; Industry 3.5; AI heuristics for optimisation; sustainable supply chain management	SHOP SCHEDULING PROBLEM; GENETIC ALGORITHM; TRIP DESIGN; DIFFERENTIAL EVOLUTION; SEARCH; HYBRID; OPTIMIZATION; ROUTE	This paper addresses a tourist trip design problem and a tour route planning problem to improve the competitiveness of community tourism. The problem was investigated with the objective to maximise the total number of tourists interested in visiting multiple points of interest and several specific activities to receive a satisfactory service by matching their preferences. The problem was formulat…	[Thumrongvut, Pawnrat; Sethanan, Kanchana; Jamrus, Thitipong] Khon Kaen Univ, Fac Engn, Dept Ind Engn, Res Unit Syst Modeling Ind, Khon Kaen, Thailand; [Pitakaso, Rapeepan] Ubon Ratchathani Univ, Fac Engn, Dept Ind Engn, Metaheurist Logist Optimizat Lab, Ubon Ratchathani, Thailand; [Golinska-Dawson, Paulina] Poznan Univ Tech, Fac Engn Management, Poznan, Poland	Khon Kaen University; Ubon Ratchathani University; Poznan University of Technology	Sethanan, K (corresponding author), Khon Kaen Univ, Fac Engn, Dept Ind Engn, Res Unit Syst Modeling Ind, Khon Kaen, Thailand.	skanch@kku.ac.th	Thumrongvut, Pawnrat/GWV-2094-2022; Pitakaso, Rapeepan/AEH-8720-2022; Golinska-Dawson, Paulina/M-6639-2014	Pitakaso, Rapeepan/0000-0002-5896-4895; Golinska-Dawson, Paulina/0000-0002-5821-3805; Thumrongvut, Pawnrat/0000-0003-3894-7446	Research Unit on System Modelling for Industry, Department of Industrial Engineering, Faculty of Engineering, Khon Kaen University, Thailand [SMI. KKU 64004]	Research Unit on System Modelling for Industry, Department of Industrial Engineering, Faculty of Engineering, Khon Kaen University, Thailand	This work is supported by the Research Unit on System Modelling for Industry [Grant number SMI. KKU 64004], Department of Industrial Engineering, Faculty of Engineering, Khon Kaen University, Thailand.		63	7	7	3	25	TAYLOR & FRANCIS LTD	ABINGDON	2-4 PARK SQUARE, MILTON PARK, ABINGDON OR14 4RN, OXON, ENGLAND	1367-5567	1469-848X		INT J LOGIST-RES APP	Int. J. Logist.-Res. Appl.	NOV 2	2023	26	11
47	C	Carrasco, RA; Blasco, MF; García-Madariaga, J; Herrera-Viedma, E		Kacprzyk, J; Szmidt, E; Zadrozny, S; Atanassov, KT; Krawczak, M		Alberto Carrasco, Ramon; Francisca Blasco, Maria; Garcia-Madariaga, Jesiis; Herrera-Viedma, Enrique			Integrating a Tourism Service Quality Evaluation Linguistic Multi-criteria Decision Making Model into a Relational Database Management System	ADVANCES IN FUZZY LOGIC AND TECHNOLOGY 2017, VOL 1	Advances in Intelligent Systems and Computing		English	Proceedings Paper	10th Conference of the European-Society-for-Fuzzy-Logic-and-Technology (EUSFLAT) / 16th International Workshop on Intuitionistic Fuzzy Sets and Generalized Nets (IWIFSGN)	SEP 11-15, 2017	Warsaw, POLAND	European Soc Fuzzy Log & Technol,Polish Acad Sci, Dept IV Engn Sci,Polish Acad Sci, Syst Res Inst,Polish Operat & Syst Res Soc				In this paper we present an implementation, using a conventional relational database management system, of a linguistic multi-criteria decision making model to integrate the hotel guests' opinions included in the WWW and expressed on several dimensions (or attributes) in order to obtain a SERVQUAL scale evaluation value of service quality. SERVQUAL scale is commonly used in tourism to standardize…	[Alberto Carrasco, Ramon; Francisca Blasco, Maria; Garcia-Madariaga, Jesiis] Univ Complutense Madrid, Dept Mkt & Market Res, Madrid, Spain; [Herrera-Viedma, Enrique] Univ Granada, Dept Comp Sci & Artificial Intelligence, Granada, Spain	Complutense University of Madrid; University of Granada	Carrasco, RA (corresponding author), Univ Complutense Madrid, Dept Mkt & Market Res, Madrid, Spain.	ramoncar@ucm.es; fblasco@emp.ucm.es; jesgarci@ucm.es; viedma@decsai.ugr.es	Garcia-Madariaga, Jesus/L-3544-2018; Blasco, Francisca/AAG-2553-2021; HERRERA-VIEDMA, ENRIQUE/C-2704-2008; Blasco, Francis/F-8182-2016; CARRASCO, RAMON ALBERTO/D-9973-2012	Blasco, Francis/0000-0002-6660-3571; CARRASCO, RAMON ALBERTO/0000-0001-7365-349X	FEDER [TIN2013-40658-P, TIN2016-75850-R]	FEDER(European Union (EU)Spanish Government)	This paper has been developed with the FEDER financing of Projects TIN2013-40658-P and TIN2016-75850-R.		14	0	0	0	6	SPRINGER INTERNATIONAL PUBLISHING AG	CHAM	GEWERBESTRASSE 11, CHAM, CH-6330, SWITZERLAND	2194-5357	2194-5365	978-3-319-66830-7; 978-3-319-66829-1	ADV INTELL SYST			2018	641
48	J	Ding, J; Weng, LY; Fan, LL; Liu, PX				Ding, Jie; Weng, Lingyan; Fan, Lili; Liu, Peixue			Spatial layout optimization model integrating layered attention mechanism in the development of smart tourism management	PEERJ COMPUTER SCIENCE			English	Article						Tourism demand forecasting; Multi-layer attention mechanism; Multi scenic itineraries; Spatial layout; Dynamic spatial perception		Tourism demand projection is paramount for both corporate operations and destination management, facilitating tourists in crafting bespoke, multifaceted itineraries and enriching their vacation experiences. This study proposes a multi- layer self attention mechanism recommendation algorithm based on dynamic spatial perception, with the aim of refining fi ning the analysis of tourists' ' emotional…	[Ding, Jie; Weng, Lingyan; Fan, Lili] Nanjing Inst Tourism & Hospitality, Sch Tourism, Nanjing, Jiangsu, Peoples R China; [Liu, Peixue] Nanjing Univ Finance & Econ, Sch Business Adm, Nanjing, Jiangsu, Peoples R China	Nanjing University of Finance & Economics	Liu, PX (corresponding author), Nanjing Univ Finance & Econ, Sch Business Adm, Nanjing, Jiangsu, Peoples R China.	9120221002@nufe.edu.cn			MOE (Ministry of Education in China) Project of Humanities and Social Sciences [22YJA760106]; Key Project on Higher Education Reform Research in Jiangsu Province [2023JSJG216]; Project of Jiangsu Tourism and Culture Research Institute [24jslwy007]	MOE (Ministry of Education in China) Project of Humanities and Social Sciences; Key Project on Higher Education Reform Research in Jiangsu Province; Project of Jiangsu Tourism and Culture Research Institute	This work was supported by the MOE (Ministry of Education in China) Project of Humanities and Social Sciences (22YJA760106) , the Key Project on Higher Education Reform Research in Jiangsu Province (2023JSJG216) , and the Project of Jiangsu Tourism and Culture Research Institute (24jslwy007) . The funders had no role in study design, data collection and analysis, decision to publish, or preparati…		23	0	0	7	7	PEERJ INC	LONDON	341-345 OLD ST, THIRD FLR, LONDON, EC1V 9LL, ENGLAND		2376-5992		PEERJ COMPUT SCI	PeerJ Comput. Sci.	OCT 9	2024	10
49	J	Bustamante, A; Sebastia, L; Onaindia, E				Bustamante, Alexander; Sebastia, Laura; Onaindia, Eva			BITOUR: A Business Intelligence Platform for Tourism Analysis	ISPRS INTERNATIONAL JOURNAL OF GEO-INFORMATION			English	Article						business intelligence; collaborative data; tourism competitiveness	DATA WAREHOUSE; SOCIAL MEDIA; BIG DATA; TOOL	Integrating collaborative data in data-driven Business Intelligence (BI) system brings an opportunity to foster the decision-making process towards improving tourism competitiveness. This article presents BITOUR, a BI platform that integrates four collaborative data sources (Twitter, Openstreetmap, Tripadvisor and Airbnb). BITOUR follows a classical BI architecture and provides functionalities fo…	[Bustamante, Alexander; Sebastia, Laura; Onaindia, Eva] Univ Politecn Valencia, Valencia Res Inst Artificial Intelligence VRAIN, Valencia 46022, Spain; [Bustamante, Alexander] Univ Magdalena, Fac Ingn, Santa Marta 470001, Colombia	Universitat Politecnica de Valencia; Universidad del Magdalena	Bustamante, A (corresponding author), Univ Politecn Valencia, Valencia Res Inst Artificial Intelligence VRAIN, Valencia 46022, Spain.;Bustamante, A (corresponding author), Univ Magdalena, Fac Ingn, Santa Marta 470001, Colombia.	albus2@doctor.upv.es; lsebastia@dsic.upv.es; onaindia@dsic.upv.es	Sebastia, Laura/AAD-5160-2019; Onaindia, Eva/L-9594-2014	Sebastia, Laura/0000-0001-8505-9471; Onaindia, Eva/0000-0001-6931-8293	COLCIENCIAS through a PhD scholarship	COLCIENCIAS through a PhD scholarship	This work has been supported by COLCIENCIAS through a PhD scholarship.		58	5	6	4	30	MDPI	BASEL	ST ALBAN-ANLAGE 66, CH-4052 BASEL, SWITZERLAND		2220-9964		ISPRS INT J GEO-INF	ISPRS Int. Geo-Inf.	NOV	2020	9	11
50	J	Suanpang, P; Jamjuntr, P; Jermsittiparsert, K; Kaewyong, P				Suanpang, Pannee; Jamjuntr, Pitchaya; Jermsittiparsert, Kittisak; Kaewyong, Phuripoj			Autonomous Energy Management by Applying Deep Q-Learning to Enhance Sustainability in Smart Tourism Cities	ENERGIES			English	Article						autonomous energy; energy management; deep Q-learning; smart tourism; smart city; sustainability		Autonomous energy management is becoming a significant mechanism for attaining sustainability in energy management. This resulted in this research paper, which aimed to apply deep reinforcement learning algorithms for an autonomous energy management system of a microgrid. This paper proposed a novel microgrid model that consisted of a combustion set of a household load, renewable energy, an energ…	[Suanpang, Pannee; Kaewyong, Phuripoj] Suan Dusit Univ, Fac Sci & Technol, Bangkok 10300, Thailand; [Jamjuntr, Pitchaya] King Mongkuts Univ Technol Thonburi, Comp Engn Dept, Bangkok 10140, Thailand; [Jermsittiparsert, Kittisak] Univ City Isl, Fac Educ, CY-9945 Gazimagusa, Cyprus; [Jermsittiparsert, Kittisak] Univ Muhammadiyah Sinjai, Fac Social & Polit Sci, Kabupaten Sinjai 92615, Sulawesi Selata…	Suan Dusit University; King Mongkuts University of Technology Thonburi; Universitas Muhammadiyah Sinjai; Universitas Muhammadiyah Makassar; Universitas Muhammadiyah Sidenreng Rappang	Suanpang, P (corresponding author), Suan Dusit Univ, Fac Sci & Technol, Bangkok 10300, Thailand.	pitchayajam@yahoo.com; pitchayajam@yahoo.com; kittisak.jermsittiparsert@adakent.edu.tr; pitchayajam@yahoo.com	Jermsittiparsert, Kittisak/O-5786-2019; Jermsittiparsert, Kittisak/D-1320-2017	Jermsittiparsert, Kittisak/0000-0003-3245-8705	Suan Dusit University under Ministry of Higher Education, Science, Research and Innovation, Thailand [65-FF-003]; Innovation of Smart Tourism to Promote Tourism in Suphan Buri Province	Suan Dusit University under Ministry of Higher Education, Science, Research and Innovation, Thailand; Innovation of Smart Tourism to Promote Tourism in Suphan Buri Province	This research was funded by Suan Dusit University under the Ministry of Higher Education, Science, Research and Innovation, Thailand. The research project grant number 65-FF-003, Innovation of Smart Tourism to Promote Tourism in Suphan Buri Province.		39	13	13	2	19	MDPI	BASEL	ST ALBAN-ANLAGE 66, CH-4052 BASEL, SWITZERLAND		1996-1073		ENERGIES	Energies	MAR	2022	15	5
51	J	Qi, HX; Han, ZF				Qi, Haixia; Han, Zhifei			Emotion Recognition and Management in the Tourism Industry During Emergency Events Using Improved Convolutional Neural Network	IEEE ACCESS			English	Article						Emotion recognition; Convolutional neural networks; Three-dimensional displays; Solid modeling; Feature extraction; Brain modeling; Tourism industry; Emergency services; Convolutional neural network; tourism industry; emergency events; emotion recognition		The purpose is to optimize emotion recognition capabilities in the tourism industry during emergency events and enhance management efficiency. Hence, based on the principles of emergency events and emotion recognition, this work has outlined the fundamental emotion recognition process. Additionally, an emotion recognition model is constructed based on a Convolutional Neural Network (CNN), and the…	[Qi, Haixia] Northeast Petr Univ, Dept Management, Daqing 066004, Peoples R China; [Han, Zhifei] Hebei Inst Int Business & Econ, Qinhuangdao 066311, Peoples R China	Northeast Petroleum University	Han, ZF (corresponding author), Hebei Inst Int Business & Econ, Qinhuangdao 066311, Peoples R China.	henry18751280@126.com			Guided Innovation Fund of Northeast Petroleum University, in 2020, ''Research on the application of emotional labor strategy in hotel industry''	Guided Innovation Fund of Northeast Petroleum University, in 2020, ''Research on the application of emotional labor strategy in hotel industry''	No Statement Available		42	0	0	4	9	IEEE-INST ELECTRICAL ELECTRONICS ENGINEERS INC	PISCATAWAY	445 HOES LANE, PISCATAWAY, NJ 08855-4141 USA	2169-3536			IEEE ACCESS	IEEE Access		2024	12
52	C	Rab, H		Iacob, AI		Rab, Henriett			2nd GLOBAL CONFERENCE on BUSINESS, ECONOMICS, MANAGEMENT and TOURISM, 30-31 October 2014, Prague, Czech Republic	2ND GLOBAL CONFERENCE ON BUSINESS, ECONOMICS, MANAGEMENT AND TOURISM	Procedia Economics and Finance		English	Proceedings Paper	2nd Global Conference on Business, Economics and Management and Tourism (BEMTUR)	OCT 29-31, 2014	Prague, CZECH REPUBLIC			social security; pension system; flexible retirement; social rights		These days we have experiences about the basic crisis of the pension systems and mainly old-age pension systems. The states try to minimalize the obligations taken from the families and it is justified by the difficulties of financing. On international level the ILO Convention No. 102 decrees the possibility of flexible retiring for the member states which take the obligations, but it is contrary…	Univ Debrecen, Fac Law, Debrecen, Hungary	University of Debrecen	Rab, H (corresponding author), Univ Debrecen, Fac Law, Kassai Ut 26 Inkubatorhaz 2-214, Debrecen, Hungary.	rab.henriett@law.unideb.hu							14	0	1	0	4	ELSEVIER SCIENCE BV	AMSTERDAM	SARA BURGERHARTSTRAAT 25, PO BOX 211, 1000 AE AMSTERDAM, NETHERLANDS	2212-5671			PROC ECON FINANC			2015	23
53	J	Wei, F				Wei, Fei			Performance Evaluation of Tourism Human Resource Management Based on Fuzzy Data Mining	JOURNAL OF MATHEMATICS			English	Article							NEURAL-NETWORKS; OSTEONECROSIS; OPTIMIZATION; LEGITIMACY; DIRECTION	Tourism human resources performance management is an important means of enterprise core competitiveness; the assessment results is good or bad will directly affect the staff's work enthusiasm and attitude; the use of tourism human resources, configuration, and performance carries on the scientific, reasonable, and effective comprehensive evaluation and can fully stimulate the potential of employe…	[Wei, Fei] Zhengzhou Univ Technol, Coll Management, Zhengzhou, Henan, Peoples R China	Zhengzhou University of Technology	Wei, F (corresponding author), Zhengzhou Univ Technol, Coll Management, Zhengzhou, Henan, Peoples R China.	20041025@zzut.edu.cn	Wei, Fei/ITZ-4717-2023		Key Research and Development and Promotion Special Project of Henan Province [212400410526]	Key Research and Development and Promotion Special Project of Henan Province	AcknowledgmentsThis work was supported by the Key Research and Development and Promotion Special Project of Henan Province (project title: Research on the Financial Policy System of Reducing Cost and Increasing Efficiency of Henan Entity Enterprises in the New Era), under Grant no. 212400410526.		32	0	0	6	33	HINDAWI LTD	LONDON	ADAM HOUSE, 3RD FLR, 1 FITZROY SQ, LONDON, W1T 5HF, ENGLAND	2314-4629	2314-4785		J MATH-UK	J. Math.	FEB 21	2022	2022
54	J	Khan, S; Gulistan, M; Kausar, N; Kadry, S; Kim, J				Khan, Salma; Gulistan, Muhammad; Kausar, Nasreen; Kadry, Seifedine; Kim, Jungeun			A Novel Method for Determining Tourism Carrying Capacity in a Decision-Making Context Using q-Rung Orthopair Fuzzy Hypersoft Environment	CMES-COMPUTER MODELING IN ENGINEERING & SCIENCES			English	Article						q-Rung orthopair fuzzy hypersoft set; decision-making; tourism carrying capacity; aggregation operator	PYTHAGOREAN MEMBERSHIP GRADES; SOFT SET-THEORY; AGGREGATION OPERATORS	Tourism is a popular activity that allows individuals to escape their daily routines and explore new destinations for various reasons, including leisure, pleasure, or business. A recent study has proposed a unique mathematical concept called a q-Rung orthopair fuzzy hypersoft set (q-ROFHS) to enhance the formal representation of human thought processes and evaluate tourism carrying capacity. This…	[Khan, Salma; Gulistan, Muhammad] Hazara Univ, Dept Math & Stat, Mansehra 21120, Pakistan; [Kausar, Nasreen] Yildiz Tech Univ, Fac Arts & Sci, Dept Math, TR-34210 Istanbul, Turkiye; [Kadry, Seifedine] Noroff Univ Coll, Dept Appl Data Sci, N-4612 Kristiansand, Norway; [Kadry, Seifedine] Ajman Univ, Artificial Intelligence Res Ctr AIRC, Ajman 346, U Arab Emirates; [Kadry, Seifedine] Lebanese Amer U…	Hazara University; Yildiz Technical University; Ajman University; Lebanese American University; Kongju National University	Kim, J (corresponding author), Kongju Natl Univ, Dept Software, Cheonan 31080, South Korea.;Kim, J (corresponding author), Konju Natl Univ, CMPSI, Cheonan 31080, South Korea.	jekim@kongju.ac.kr	Khan, Salma/LBD-7944-2024; Kausar, Nasreen/AAF-3386-2020; Kadry, Seifedine/C-7437-2011; Muhammad, Gulistan/IAO-6357-2023	Khan, Dr. Salma/0000-0003-1840-2764	National Research Foundation of Korea (NRF) - Korea government (MSIT) [2021R1A4A1031509]	National Research Foundation of Korea (NRF) - Korea government (MSIT)(National Research Foundation of KoreaMinistry of Science, ICT & Future Planning, Republic of KoreaMinistry of Science & ICT (MSIT), Republic of Korea)	Funding Statement: This research was supported by the National Research Foundation of Korea (NRF) grant funded by the Korea government (MSIT) (No. 2021R1A4A1031509) .		55	2	2	1	5	TECH SCIENCE PRESS	HENDERSON	871 CORONADO CENTER DR, SUTE 200, HENDERSON, NV 89052 USA	1526-1492	1526-1506		CMES-COMP MODEL ENG	CMES-Comp. Model. Eng. Sci.		2024	138	2
55	C	Di Matteo, D; Cavuta, G		Iacob, AI		Di Matteo, Dante; Cavuta, Giacomo			Enogastronomic Tourism: can it mitigate the Intangibility of the Destination? Streetfood as a new Business Model for the Management of Tourist Regions	3RD GLOBAL CONFERENCE ON BUSINESS, ECONOMICS, MANAGEMENT AND TOURISM	Procedia Economics and Finance		English	Proceedings Paper	3rd Global Conference on Business, Economics, Management and Tourism (BEMTUR)	NOV 26-28, 2015	Rome, ITALY			streetfood; tourism governance; intangibility; diversification		According to the literature, one of the most obvious and immediately perceptible limitations in tourism concerns the intangibility of the product/service provided, defined as the inability to assess objectively the tangible and intangible aspects of a tourist destination if not having visited it before, making - actually - uncertain the selection process of the interest variables. This means that…	[Di Matteo, Dante; Cavuta, Giacomo] Univ G DAnnunzio, Sch Econ, Dept Econ DEc, Viale Pindaro 42, I-65127 Pescara, Italy	G d'Annunzio University of Chieti-Pescara	Di Matteo, D (corresponding author), Univ G DAnnunzio, Sch Econ, Dept Econ DEc, Viale Pindaro 42, I-65127 Pescara, Italy.	dante.dimatteo@unich.it	Di Matteo, Dante/ISB-8534-2023						12	6	8	0	7	ELSEVIER SCIENCE BV	AMSTERDAM	SARA BURGERHARTSTRAAT 25, PO BOX 211, 1000 AE AMSTERDAM, NETHERLANDS	2212-5671			PROC ECON FINANC			2016	39
56	C	Veiga, T; Carvalho, S; Silva, JC; Carvalho, JV		Carvalho, JV; Abreu, A; Liberato, D; Rebolledo, JAD		Veiga, Tiago; Carvalho, Sandro; Silva, Joao Carlos; Carvalho, Joao Vidal			Nutrition Software to the Management and Support of Health and Wellness Tourism: An Approach	ADVANCES IN TOURISM, TECHNOLOGY AND SYSTEMS, VOL 2, ICOTTS 2023	Smart Innovation Systems and Technologies		English	Proceedings Paper	International Conference on Tourism, Technology and Systems (ICOTTS)	NOV 02-04, 2023	Bacalar, MEXICO					Nutrition is a complex field that assesses the relationship between foods, their nutritional composition and their impact on health and disease. In Portugal, there are around 4000 nutritionists, with 90% employed or self-employed. These professionals work in large collective catering groups and sport, with a growing focus on sports. This proposal aims to develop a nutrition management platform th…	[Veiga, Tiago; Carvalho, Sandro; Silva, Joao Carlos] Polytech Inst Cavado & Ave IPCA, Ai, Barcelos, Portugal; [Carvalho, Joao Vidal] Polytech Porto, CEOS PP, ISCAP, P-4465004 Sao Mamede De Infesta, Portugal	Instituto Politecnico do Cavado e do Ave - IPCA; Universidade do Porto; Centre for Organisational & Social Studies of the Polytechnic Institute of Porto (CEOS.PP); Instituto Politecnico do Porto	Silva, JC (corresponding author), Polytech Inst Cavado & Ave IPCA, Ai, Barcelos, Portugal.	scarvalho@ipca.pt; jcsilva@ipca.pt; cajvidal@iscap.ipp.pt	Carvalho, Sandro/KAZ-9740-2024		Portuguese national funds through FCT-Fundacao para a Ciencia e Tecnologia [UIDB/05422/2020]	Portuguese national funds through FCT-Fundacao para a Ciencia e Tecnologia(Fundacao para a Ciencia e a Tecnologia (FCT))	This work is financed by Portuguese national funds through FCT-Fundacao para a Ciencia e Tecnologia, under the project UIDB/05422/2020.		26	0	0	0	0	SPRINGER-VERLAG SINGAPORE PTE LTD	SINGAPORE	152 BEACH ROAD, #21-01/04 GATEWAY EAST, SINGAPORE, 189721, SINGAPORE	2190-3018	2190-3026	978-981-99-9757-2; 978-981-99-9758-9; 978-981-99-9882-1	SMART INNOV SYST TEC			2024	384
57	C	Soh, MC; Rahim, MAA; Zainuddin, A; Soegiono, AN				Soh, Mazlan Che; Abdul Rahim, Memiyanty Abdul; Zainuddin, Azizan; Soegiono, Agie Nugroho			Financial Management Policy and Governance for the Preservation of the UNESCO World Heritage Site in Malaysia as a Tourism Attraction	ENVIRONMENT-BEHAVIOUR PROCEEDINGS JOURNAL			English	Proceedings Paper	International Conference on Public Policy and Social Science (ICoPS)	SEP 13-15, 2023	Univ Tech MARA, Bosnia, BOSNIA & HERCEG		Univ Tech MARA	Financial Management; Policy and Governance; UNESCO; World Heritage Site		Tourism in developing countries especially in Malaysia faces challenges between economic development and sustainable tourism, especially in promoting heritage assets and sites. A comprehensive policy together with proper governance needs to be revised to tackle this issue. It is necessary to analyse and understand the current policy and propose how the Malaysian government can establish a compreh…	[Soh, Mazlan Che; Abdul Rahim, Memiyanty Abdul; Zainuddin, Azizan] Univ Teknol MARA, Fac Adm Sci & Policy Studies, Shah Alam, Malaysia; [Abdul Rahim, Memiyanty Abdul] Univ Teknol MARA, Socio Econ Res Grp, Governance & Policy Studies GaPs 2, Shah Alam, Malaysia; [Abdul Rahim, Memiyanty Abdul] Univ Teknol MARA, Inst Big Data & Artificial Intelligence IBDAAI, Shah Alam, Malaysia; [Soegiono, Agie Nug…	Universiti Teknologi MARA; Universiti Teknologi MARA; Universiti Teknologi MARA; Universitas Surabaya (UBAYA)	Rahim, MAA (corresponding author), Univ Teknol MARA, Fac Adm Sci & Policy Studies, Shah Alam, Malaysia.;Rahim, MAA (corresponding author), Univ Teknol MARA, Socio Econ Res Grp, Governance & Policy Studies GaPs 2, Shah Alam, Malaysia.;Rahim, MAA (corresponding author), Univ Teknol MARA, Inst Big Data & Artificial Intelligence IBDAAI, Shah Alam, Malaysia.	mazlan3161@uitm.edu.my; memiyanty@uitm.edu.my; azizan_zainuddin@uitm.edu.my; agie@fisip.unair.ac.id	Zainuddin, Azizan/GYQ-7514-2022		Faculty of Administrative Science and Policy Studies, Universiti Teknologi MARA, Shah Alam, Selangor [600 - TNCPI 5/3/DDF (FSPPP) (08/2023)]	Faculty of Administrative Science and Policy Studies, Universiti Teknologi MARA, Shah Alam, Selangor	We would like to express our gratitude to the Faculty of Administrative Science and Policy Studies, Universiti Teknologi MARA, Shah Alam, Selangor in which this study has been funded under a grant with the reference number 600 - TNCPI 5/3/DDF (FSPPP) (08/2023) .		18	0	0	2	2	E-IPH LTD UK	SHEFFIELD	THE LEADMILL, 6 LEADMILL RD, PO BOX STUDIO 7, SHEFFIELD, S1 4SE, ENGLAND	2398-4287			ENVIRON-BEHAV PROC J	Environ.-Behav. Proc. J.	AUG	2024	9
58	J	Zhang, L; Hang, L; Jin, W; Kim, D				Zhang, Linchao; Hang, Lei; Jin, Wenquan; Kim, Dohyeun			Interoperable Multi-Blockchain Platform Based on Integrated REST APIs for Reliable Tourism Management	ELECTRONICS			English	Article						blockchain; multi-chain; tourism; router; hash	SMART CONTRACTS; INTERNET	The tourism industry can significantly benefit from the blockchain since its implementation can build trust among stakeholders and improve customer satisfaction. However, most of the existing tourism-specified blockchain platforms are single-chains that provide business support for enterprises without guaranteeing transaction information privacy. Besides, these platforms are specified to a single…	[Zhang, Linchao; Kim, Dohyeun] Jeju Natl Univ, Dept Comp Engn, Jeju 63243, South Korea; [Hang, Lei] Shanghai Normal Univ, Tianhua Coll, Shanghai 201815, Peoples R China; [Jin, Wenquan] Jeju Natl Univ, Big Data Res Ctr, Jeju 63243, South Korea	Jeju National University; Shanghai Normal University; Jeju National University	Kim, D (corresponding author), Jeju Natl Univ, Dept Comp Engn, Jeju 63243, South Korea.	hanglinchao@jejunu.ac.kr; hanglei@jejunu.ac.kr; wenquan.jin@jejunu.ac.kr; kimdh@jejunu.ac.kr	Hang, Lei/AAM-5919-2020; Zhang, Linchao/GPX-6272-2022	Jin, Wenquan/0000-0002-8404-9447; Hang, Lei/0000-0002-9336-9274; Zhang, Linchao/0000-0001-8547-9273	Energy Cloud R&D Program through the National Research Foundation of Korea(NRF) - Ministry of Science, ICT [2019M3F2A1073387]; Institute of Information & communications Technology Planning & Evaluation (IITP) - Korea government (MSIT) [2021-0-00188]; Open	Energy Cloud R&D Program through the National Research Foundation of Korea(NRF) - Ministry of Science, ICT(National Research Foundation of KoreaMinistry of Science, ICT & Future Planning, Republic of Korea); Institute of Information & communications Techn	This research was supported by Energy Cloud R&D Program through the National Research Foundation of Korea(NRF) funded by the Ministry of Science, ICT (2019M3F2A1073387), and this work was supported by Institute of Information & communications Technology Planning & Evaluation (IITP) grant funded by the Korea government (MSIT) (2021-0-00188, Open source development and standardization for AI enable…		35	13	13	5	38	MDPI	BASEL	ST ALBAN-ANLAGE 66, CH-4052 BASEL, SWITZERLAND		2079-9292		ELECTRONICS-SWITZ	Electronics	DEC	2021	10	23
59	C	Yamaka, W; Pastpipatkul, P; Sriboonchitta, S		Huynh, VN; Inuiguchi, M; Denoeux, T		Yamaka, Woraphon; Pastpipatkul, Pathairat; Sriboonchitta, Songsak			Business Cycle of International Tourism Demand in Thailand: A Markov-Switching Bayesian Vector Error Correction Model	INTEGRATED UNCERTAINTY IN KNOWLEDGE MODELLING AND DECISION MAKING, IUKM 2015	Lecture Notes in Artificial Intelligence		English	Proceedings Paper	4th International Symposium on Integrated Uncertainty in Knowledge Modelling and Decision Making (IUKM)	OCT 15-17, 2015	Nha Trang, VIETNAM	Pacific Ocean Univ,VNU Hanoi Univ Engn & Technol,Hanoi Natl Univ Educ,Japan Adv Inst Sci & Technol,Natl Fdn Sci & Technol Dev Vietnam		MS-VECM; Bayesian; Thailand's tourism demand; Forecasting	FORECASTING TOURISM	This paper uses the Markov-switching Bayesian Vector Error Correction model (MS-BVECM) model to estimate the long-run and short-run relation for Thailand's tourism demand from five major countries, namely Japan, Korea, China, Russia, and Malaysia. The empirical findings of this study indicate that there exist a long-run and some short-run relationships between these five countries. Additionally, …	[Yamaka, Woraphon; Pastpipatkul, Pathairat; Sriboonchitta, Songsak] Chiang Mai Univ, Fac Econ, Chiang Mai 50000, Thailand	Chiang Mai University	Yamaka, W (corresponding author), Chiang Mai Univ, Fac Econ, Chiang Mai 50000, Thailand.	woraphon.econ@gmail.com; ppthairat@hotmail.com	Yamaka, Woraphon/J-2812-2019	yamaka, woraphon/0000-0002-0787-1437					16	1	1	0	9	SPRINGER-VERLAG BERLIN	BERLIN	HEIDELBERGER PLATZ 3, D-14197 BERLIN, GERMANY	0302-9743		978-3-319-25135-6; 978-3-319-25134-9	LECT NOTES ARTIF INT			2015	9376
60	C	Wang, Y; Lee, K; Lee, I		Fujita, H; Ali, M; Selamat, A; Sasaki, J; Kurematsu, M		Wang, Ye; Lee, Kyungmi; Lee, Ickjai			Multivariate Higher Order Information for Emergency Management Based on Tourism Trajectory Datasets	TRENDS IN APPLIED KNOWLEDGE-BASED SYSTEMS AND DATA SCIENCE	Lecture Notes in Artificial Intelligence		English	Proceedings Paper	29th International Conference on Industrial, Engineering and Other Applications of Applied Intelligent Systems (IEA/AIE)	AUG 02-04, 2016	Morioka, JAPAN	Int Soc Appl Intelligence			VISUAL ANALYTICS; BEHAVIOR	Higher order information of trajectory dataset for what-if analysis is getting more popular for providing better informed decision making. However, existing research had been studied trajectory higher order information based on univariate dataset only. There is yet no research to study higher order information of multivariate dataset for trajectory analysis. This paper will introduce a unified da…	[Wang, Ye; Lee, Kyungmi; Lee, Ickjai] James Cook Univ, Coll Business Law & Governance, Informat Technol Acad, Cairns, Qld 4870, Australia	James Cook University	Lee, I (corresponding author), James Cook Univ, Coll Business Law & Governance, Informat Technol Acad, Cairns, Qld 4870, Australia.	ickjai.lee@jcu.edu.au							16	1	1	0	7	SPRINGER INT PUBLISHING AG	CHAM	GEWERBESTRASSE 11, CHAM, CH-6330, SWITZERLAND	0302-9743		978-3-319-42007-3; 978-3-319-42006-6	LECT NOTES ARTIF INT			2016	9799
61	C	Musa, A; Abd Ghadas, ZA; Kadir, SA		Alareeni, B; Hamdan, A		Musa, Azizah; Abd Ghadas, Zuhairah Ariff; Kadir, Suhaila Abdul			Halal Tourism: A Debate Between Its Religious Values and Business Interest; A Case of Malaysia	IMPACT OF ARTIFICIAL INTELLIGENCE, AND THE FOURTH INDUSTRIAL REVOLUTION ON BUSINESS SUCCESS	Lecture Notes in Networks and Systems		English	Proceedings Paper	International Conference on Business and Technology (ICBT)	NOV 06-07, 2021	Istanbul, TURKEY	EuroMid Acad Business & Technol		Halal tourism; Malaysia; Religious obligation; Business interest	ISLAM	Tourism industry plays a critical role in propelling a country's economy. It is undeniable that most countries targeted to accelerate their revenue through the tourism industry and hotel sector. It is undeniable that halal tourism has become among the top agendas in worldwide tourism due to the growing number of Muslim travellers. This situation resulted in significant foreign earnings. As a Musl…	[Musa, Azizah; Kadir, Suhaila Abdul] Univ Malaysia Kelantan, Fac Entrepreneurship & Business, Kota Baharu, Kelantan, Malaysia; [Abd Ghadas, Zuhairah Ariff] Univ Sultan Zainal Abidin, Fac Law & Int Relat, Kuala Terengganu, Malaysia	Universiti Malaysia Kelantan; Universiti Sultan Zainal Abidin	Musa, A (corresponding author), Univ Malaysia Kelantan, Fac Entrepreneurship & Business, Kota Baharu, Kelantan, Malaysia.	azizah.m@umk.edu.my			Ministry of Higher Education Malaysia [FRGS/1/2018/SS01/UMK/03/01]	Ministry of Higher Education Malaysia(Ministry of Education, Malaysia)	The authors thank anonymous reviewers for their valuable comments and the Ministry of Higher Education Malaysia for funding the study of the main author and the funding of F.R.G.S. scheme-FRGS/1/2018/SS01/UMK/03/01.		49	1	1	0	5	SPRINGER INTERNATIONAL PUBLISHING AG	CHAM	GEWERBESTRASSE 11, CHAM, CH-6330, SWITZERLAND	2367-3370	2367-3389	978-3-031-08093-7; 978-3-031-08092-0	LECT NOTE NETW SYST			2023	485
62	C	Rakhmanissazly, A; Permatasari, AI; Peranginangin, EC		Riyadi, MA; Winarni, TI; Wijayanti, DP; Tsuchiya, M; Susanto, H; Jamari; Gasem, H; Ambariyanto; Zainuri, M; Faraz, SMH; Pals, G; Hagerman, R; Tassone, F; Sudoyo, H; Rajasa, OK; Starger, C; Ravishankar, CN; Sabdono, A; Barbosa, M; Igarashi, Y; Jaswir, I; H		Rakhmanissazly, Arsi; Permatasari, Anggun Intan; Peranginangin, Ely Chandra			Edco-tourism; A Coastal Management Program to Improve Social Economics	3RD INTERNATIONAL CONFERENCE ON TROPICAL AND COASTAL REGION ECO DEVELOPMENT 2017	IOP Conference Series-Earth and Environmental Science		English	Proceedings Paper	3rd International Conference on Tropical and Coastal Region Eco Development (ICTCRED)	OCT 02-04, 2017	Yogyakarta, INDONESIA	Diponegoro Univ, Res & Community Serv Inst		corporate social responsibility; coastal management; edco-tourism; environment; socioeconomic; sustainable development		Coastal erosion is a natural process even in pristine environments. Mangrove is tropical coastal vegetation that may prevent and controls the soil erosion. As the longest coastline country in the world, Indonesia has great ecological potential of mangrove. Sadly, according to Food and Agriculture Organization (FAO) since 2007 Indonesia has lost 40% of mangrove forest because of deforestation for …	[Rakhmanissazly, Arsi; Permatasari, Anggun Intan; Peranginangin, Ely Chandra] PT PERTAMINA EP Asset 1 Pangkalan Susu Field, Dept Legal & Relat, Langkat 20858, North Sumatera, Indonesia; [Permatasari, Anggun Intan] Gadjah Mada Univ, Dept Social Dev & Welf, Fac Social & Polit Sci, Yogyakarta 55281, Indonesia	Gadjah Mada University	Rakhmanissazly, A (corresponding author), PT PERTAMINA EP Asset 1 Pangkalan Susu Field, Dept Legal & Relat, Langkat 20858, North Sumatera, Indonesia.	arsi.rakhmanissazly@pertamina.com			PT PERTAMINA EP Asset 1 Pangkalan Susu Field	PT PERTAMINA EP Asset 1 Pangkalan Susu Field	This study and strategy was supported and funded by PT PERTAMINA EP Asset 1 Pangkalan Susu Field. By implementing the program based on this study, PERTAMINA EP has awarded for GREEN PROPER since 2014 held by Ministry of Environment and Forestry Indonesia.		14	2	2	0	11	IOP PUBLISHING LTD	BRISTOL	DIRAC HOUSE, TEMPLE BACK, BRISTOL BS1 6BE, ENGLAND	1755-1307			IOP C SER EARTH ENV	IOP Conf. Ser. Earth Envir. Sci.		2018	116
63	C	Mosalev, AI; Shpilina, TM; Shcheglova, OG; Gizyatova, AS			IOP	Mosalev, A., I; Shpilina, T. M.; Shcheglova, O. G.; Gizyatova, A. Sh			HUMAN RESOURCES MANAGEMENT FOR TOURISM AND HOSPITALITY INDUSTRY IN RUSSIA	17TH THEORETICAL AND PRACTICAL CONFERENCE OPPORTUNITIES FOR DEVELOPMENT OF REGIONAL STUDIES OF SIBERIA AND NEIGHBOURING AREAS	IOP Conference Series-Earth and Environmental Science		English	Proceedings Paper	17th Theoretical and Practical Conference on Opportunities for Development of Regional Studies of Siberia and Neighbouring Areas	OCT 30-NOV 01, 2018	Tomsk, RUSSIA	Natl Res Tomsk State Univ		human resources; elements of staffing strategy; HR policies; personnel in tourism and hotel business		The article presents an analytical review of the Russian practice of human resource management in the market of the tourism industry. The key components of the staffing of tourism and hospitality in the region: the formation, use and reproduction of human resources. The article presents a detailed system of measures aimed at solving complex issues in each of the components of the staffing system.	[Mosalev, A., I] Russian State Social Univ, Dept Tourism & Hospitality, St Wilhelm Pieck,House 4,Bldg 1, Moscow 129226, Russia; [Shpilina, T. M.; Shcheglova, O. G.] Russian State Social Univ, Dept Econ & World Econ, Wilhelm Pieck St,House 4,Bldg 1, Moscow 129226, Russia; [Gizyatova, A. Sh] Russian State Social Univ, Finance & Credit Dept, Moscow, Russia; [Gizyatova, A. Sh] Russian State Social Un…	Russian State Social University (RSSU); Russian State Social University (RSSU); Russian State Social University (RSSU); Russian State Social University (RSSU)	Mosalev, AI (corresponding author), Russian State Social Univ, Dept Tourism & Hospitality, St Wilhelm Pieck,House 4,Bldg 1, Moscow 129226, Russia.	MosalevAI@rgsu.net; shpilinatm@rgsu.net; ShcheglovaOG@rgsu.net; GiziatovaASh@rgsu.net	Shpilina, Tatyana/R-3474-2018; Gizyatova, Aliya/H-1607-2016; Mosalev, Anton/F-6781-2013	Gizyatova, Aliya/0000-0001-5034-5363; Mosalev, Anton/0000-0001-7213-5308					8	1	1	0	12	IOP PUBLISHING LTD	BRISTOL	DIRAC HOUSE, TEMPLE BACK, BRISTOL BS1 6BE, ENGLAND	1755-1307			IOP C SER EARTH ENV	IOP Conf. Ser. Earth Envir. Sci.		2018	204
64	C	Sakovska, O; Kozhukhivska, R; Kustrich, L; Gomeniuk, M; Podzihun, S		Alareeni, B; Hamdan, A		Sakovska, Olena; Kozhukhivska, Raisa; Kustrich, Lilia; Gomeniuk, Maryna; Podzihun, Svitlana			Improvement of the Marketing Management System of Tourism and Hospitality Industry Enterprises on the Basis of Innovations	IMPACT OF ARTIFICIAL INTELLIGENCE, AND THE FOURTH INDUSTRIAL REVOLUTION ON BUSINESS SUCCESS	Lecture Notes in Networks and Systems		English	Proceedings Paper	International Conference on Business and Technology (ICBT)	NOV 06-07, 2021	Istanbul, TURKEY	EuroMid Acad Business & Technol		Tourism; Hospitality industry; Management; Marketing; Economy; Innovations; Improvement; Service; Consumer	ENTREPRENEURIAL ORIENTATION; SUSTAINABILITY; INDICATORS	Modern tourism is a complex social and economic system, an element of which is a highly profitable diversified economic and industrial complex, which includes travel agencies, hotels and restaurants, cafes, accommodation etc. Structural changes in the economy, instability of the environment require a revision of the forms and methods of managing the market of tourism services. On the basis of the…	[Sakovska, Olena; Kozhukhivska, Raisa] Uman Natl Univ Hort, Dept Tourism Hotel & Restaurant Business, Uman, Ukraine; [Kustrich, Lilia; Gomeniuk, Maryna] Uman Natl Univ Hort, Dept Management, Uman, Ukraine; [Podzihun, Svitlana] Pavlo Tychyna Uman State Pedag Univ, Dept Mkt Management & Business Adm, Uman, Ukraine	Ministry of Education & Science of Ukraine; Uman National University of Horticulture; Ministry of Education & Science of Ukraine; Uman National University of Horticulture; Ministry of Education & Science of Ukraine; Pavlo Tychyna Uman State Pedagogical Un	Sakovska, O (corresponding author), Uman Natl Univ Hort, Dept Tourism Hotel & Restaurant Business, Uman, Ukraine.	sakovska_lena@ukr.net; ray80@ukr.net; spodzigun@ukr.net	Gomeniuk, Maryna/AAL-6553-2020; Sakovska, Olena/AAD-7646-2019; Svetlana, Podzihun/AAI-1155-2020; Kozhukhivska, Raisa/AAB-8973-2022	Sakovska, Olena/0000-0003-2676-6170; Kustrich, Lilya/0000-0002-5048-4053; Kozuhovskaa, Raisa/0000-0003-4066-4170					38	1	1	0	13	SPRINGER INTERNATIONAL PUBLISHING AG	CHAM	GEWERBESTRASSE 11, CHAM, CH-6330, SWITZERLAND	2367-3370	2367-3389	978-3-031-08093-7; 978-3-031-08092-0	LECT NOTE NETW SYST			2023	485
65	C	Khlaikaew, K		Iacob, AI		Khlaikaew, Kunkaew			The Cultural Tourism Management under Context of World Heritage Sites: Stakeholders' Opinions between Luang Prabang Communities, Laos and Muang-kao Communities, Sukhothai, Thailand	2ND GLOBAL CONFERENCE ON BUSINESS, ECONOMICS, MANAGEMENT AND TOURISM	Procedia Economics and Finance		English	Proceedings Paper	2nd Global Conference on Business, Economics and Management and Tourism (BEMTUR)	OCT 29-31, 2014	Prague, CZECH REPUBLIC			Cultural tourism; Luang Prabang city; Sukhothai Province; World heritage sites		The purpose of this qualitative research is to study opinions of stakeholders from Luang Prabang communities, Laos and Muangkao communities Amphoe, Muang, Sukhothai Province, focusing on the cultural tourism management under context of world heritage sites. The results from the study illustrated that there are 3 types of stakeholders who are involved in cultural tourism promotion and policy forma…	[Khlaikaew, Kunkaew] Pibulsongkram Rajabhat Univ, Dept Tourism & Hotel, Muang Dist 65000, Phitsanulok Pro, Thailand	Pibulsongkram Rajabhat University	Khlaikaew, K (corresponding author), Pibulsongkram Rajabhat Univ, Dept Tourism & Hotel, Muang Dist 65000, Phitsanulok Pro, Thailand.	kulkaewtourism@hotmail.com							21	5	6	0	13	ELSEVIER SCIENCE BV	AMSTERDAM	SARA BURGERHARTSTRAAT 25, PO BOX 211, 1000 AE AMSTERDAM, NETHERLANDS	2212-5671			PROC ECON FINANC			2015	23
66	J	Seow, AN; Choong, YO; Low, MP; Ismail, NH; Choong, CK				Seow, Ai Na; Choong, Yuen Onn; Low, Mei Peng; Ismail, Nur Hafizah; Choong, Chee Keong			Building tourism SMEs' business resilience through adaptive capability, supply chain collaboration and strategic human resource	JOURNAL OF CONTINGENCIES AND CRISIS MANAGEMENT			English	Article						adaptative capability; resilience; small- and medium-sized enterprises; strategic human resources; supply chain collaboration; tourism		Small- and medium-sized enterprises (SMEs) play a significant role in the global economy, particularly, in tourism and hospitality. However, they face challenges due to their vulnerability to external disruptions. A research model was proposed to enhance SME resilience in tourism through supply chain collaboration, strategic human resource and adaptive capability. Drawing on Dynamic Capability Th…	[Seow, Ai Na; Choong, Yuen Onn; Choong, Chee Keong] Univ Tunku Abdul Rahman, Fac Business & Finance, Kampar, Perak, Malaysia; [Low, Mei Peng] Univ Tunku Abdul Rahman, Fac Accountancy & Management, Kajang, Selangor, Malaysia; [Ismail, Nur Hafizah] Univ Utara Malaysia, Coll Business, Sintok, Kedah, Malaysia	Universiti Tunku Abdul Rahman (UTAR); Universiti Tunku Abdul Rahman (UTAR); Universiti Utara Malaysia	Choong, YO (corresponding author), Univ Tunku Abdul Rahman, Fac Business & Finance, Kampar, Perak, Malaysia.	choongyo@utar.edu.my	LOW, Mei Peng/L-9113-2017; Ismail, Nur Hafizah/AHB-5206-2022; Choong, Yuen Onn/B-5207-2013	Ismail, Nur Hafizah/0000-0001-6565-8215; Low, Mei Peng/0000-0002-3141-3081; Choong, Yuen Onn/0000-0002-6888-5285	Ministry of Higher Education, Malaysia [FRGS/1/2022/SS02/UTAR/02/2]; Ministry of Higher Education (MOHE), Malaysia under the Fundamental Research Grant Scheme (FRGS)	Ministry of Higher Education, Malaysia(Ministry of Education, Malaysia); Ministry of Higher Education (MOHE), Malaysia under the Fundamental Research Grant Scheme (FRGS)	We acknowledge the funding support from the Ministry of Higher Education (MOHE), Malaysia under the Fundamental Research Grant Scheme (FRGS) (Reference No.: FRGS/1/2022/SS02/UTAR/02/2).		83	2	2	17	31	WILEY	HOBOKEN	111 RIVER ST, HOBOKEN 07030-5774, NJ USA	0966-0879	1468-5973		J CONTING CRISIS MAN	J. Cont. Crisis Manag.	JUN	2024	32	2
67	J	Seow, AN; Choong, YO; Ramayah, T				Seow, Ai Na; Choong, Yuen Onn; Ramayah, T.			Small and medium-size enterprises' business performance in tourism industry: the mediating role of innovative practice and moderating role of government support	ASIAN JOURNAL OF TECHNOLOGY INNOVATION			English	Article						Tourism small and medium enterprises; business performance; innovative practice; social media usage; business planning extent; government support	RESOURCE-BASED VIEW; SOCIAL MEDIA; ENTREPRENEURIAL ORIENTATION; ORGANIZATIONAL PERFORMANCE; INFORMATION-TECHNOLOGY; PLS-SEM; SMES; IMPACT; FIRM; SUSTAINABILITY	This paper aims to examine the constructs that contribute to the business performance of small and medium enterprises in the tourism industry (TSMEs). Data from 278 TSMEs' business owners were collected using a quantitative survey method. The results indicate that innovation practice does have a positive mediating role in the relationships between social media usage, business planning extent and …	[Seow, Ai Na; Choong, Yuen Onn] Univ Tunku Abdul Rahman, Fac Business & Finance, Kampar, Perak, Malaysia; [Ramayah, T.] Univ Sains Malaysia, Sch Management, Minden, Penang, Malaysia; [Ramayah, T.] Minjiang Univ, Newhuadu Business Sch, Internet Innovat Res Ctr, Fuzhou, Fujian, Peoples R China; [Ramayah, T.] Sunway Univ Business Sch SUBS, Dept Management, 5 Jalan Univ, Bandar Sunway, Selangor, Mala…	Universiti Tunku Abdul Rahman (UTAR); Universiti Sains Malaysia; Minjiang University	Choong, YO (corresponding author), Univ Tunku Abdul Rahman, Fac Business & Finance, Kampar, Perak, Malaysia.	choongyo@utar.edu.my	Na, Seow/ABB-1117-2021; T., Ramayah/E-4629-2010; Choong, Yuen Onn/B-5207-2013	T., Ramayah/0000-0002-7580-7058; Choong, Yuen Onn/0000-0002-6888-5285					101	16	18	7	66	ROUTLEDGE JOURNALS, TAYLOR & FRANCIS LTD	ABINGDON	2-4 PARK SQUARE, MILTON PARK, ABINGDON OX14 4RN, OXON, ENGLAND	1976-1597	2158-6721		ASIAN J TECHNOL INNO	Asian J. Technol. Innov.	MAY 4	2021	29	2
68	J	Martín-Rojo, I; Gaspar-González, AI				Martin-Rojo, Inmaculada; Gaspar-Gonzalez, Ana Isabel			The impact of social changes on MICE tourism management in the age of digitalization: a bibliometric review	REVIEW OF MANAGERIAL SCIENCE			English	Review; Early Access						Digitalization; MICE tourism; Business tourism; Bibliometric analysis; Spain; C83 Survey Methods; Sampling Methods; C88 Other Computer Software; M10 General; O32 Management of Technological Innovation and R & D; Z 30 General; Z32 Tourism and Development	TRANSFORMATION; EVOLUTION; BUSINESS	The meetings, incentives, conferences, and Exhibitions (MICE) tourism has intensively grown in recent decades. The MICE sector has also been strongly affected by social and technological changes, especially new social habits resulting from the COVID-19 pandemic. Our research maps the state of the art in MICE tourism and its digitalization from 1997 (first published article found on the subject) t…	[Martin-Rojo, Inmaculada; Gaspar-Gonzalez, Ana Isabel] Univ Malaga, Econ & Business Adm, Malaga, Spain	Universidad de Malaga	Gaspar-González, AI (corresponding author), Univ Malaga, Econ & Business Adm, Malaga, Spain.	icmartin@uma.es; aigaspar@uma.es	, inmaculada/KHU-1874-2024	Gaspar Gonzalez, Ana Isabel/0000-0002-0042-9566	Universidad de Mlaga	Universidad de Mlaga	No Statement Available		54	0	0	11	32	SPRINGER HEIDELBERG	HEIDELBERG	TIERGARTENSTRASSE 17, D-69121 HEIDELBERG, GERMANY	1863-6683	1863-6691		REV MANAG SCI	Rev. Manag. Sci.	2024 FEB 28	2024
69	C	Mosalev, AI; Stakhova, LV; Dukhovnaya, LL; Rudneva, MY; Lagusev, YM			SGEM	Mosalev, A. I.; Stakhova, L. V.; Dukhovnaya, L. L.; Rudneva, M. Y.; Lagusev, Y. M.			TOURISM OUTSIDE THE ARCTIC CIRCLE TERRITORY: THE EXPERIENCE OF CREATION AND MANAGEMENT BY TOURIST SERVICES	SGEM 2016, BK 2: POLITICAL SCIENCES, LAW, FINANCE, ECONOMICS AND TOURISM CONFERENCE PROCEEDINGS, VOL III	International Multidisciplinary Scientific Conferences on Social Sciences and Arts		English	Proceedings Paper	3rd International Multidisciplinary Scientific Conference on Social Sciences and Arts, SGEM 2016	AUG 24-30, 2016	Albena, BULGARIA	Bulgarian Acad Sci,Acad Sci Czech Republ,Latvian Acad Sci,Polish Acad Sci,Russian Acad Sci,Serbian Acad Sci & Arts,Slovak Acad Sci,Natl Acad Sci Ukraine,Natl Acad Sci Armenia,Sci Council Japan,World Acad Sci,European Acad Sci, Arts & Letters,Acad Fine Art		Arctic tourism; polar routes; the experience of countries in North America; the experience of the Nordic countries		The increasing complexity of the structure of demand for tourist services, relationships, and changes forced many countries to create new, unusual tourist offers. Tourist organizations, public authorities and consulting agencies pay attention to the potential of the Polar Regions, which previously may have seemed problematic farming areas. A new look at the problem and considering it as a potenti…	[Mosalev, A. I.; Stakhova, L. V.; Dukhovnaya, L. L.; Rudneva, M. Y.; Lagusev, Y. M.] Russian State Univ Tourism & Serv, Cherkizovo, Moskovskaya Obl, Russia	Russian State University of Tourism & Service	Mosalev, AI (corresponding author), Russian State Univ Tourism & Serv, Cherkizovo, Moskovskaya Obl, Russia.		Mosalev, Anton/F-6781-2013						17	1	1	0	7	STEF92 TECHNOLOGY LTD	SOFIA	1 ANDREY LYAPCHEV BLVD, SOFIA, 1797, BULGARIA	2367-5659		978-619-7105-74-2	INT MULTIDDISCIP SCI			2016
[truncated: 23 more columns]

## Sheet: Duplicates
		Title	Year
1	Scopus	Embracing the future of interactive marketing with contactless technology: evidence from tourism businesses	2024
2	Scopus	APPLICATION OF ANN IN TOURISM BUSINESS DEVELOPMENT FOR DEMAND FORECASTING AND MANAGEMENT OF TOURISM HEADCOUNT	2024
3	Scopus	The Convolutional Neural Network Text Classification Algorithm in the Information Management of Smart Tourism Based on Internet of Things	2024
4	Scopus	Artificial Intelligence and Sustainable Tourism Planning: A Hetero-Intelligence Methodology Proposal; [Inteligencia Artificial y Planificación Turística Sostenible: Una propuesta de Metodología Hetero-inteligente]	2024
5	Scopus	Understanding the role and impact of Generative Artificial Intelligence (AI) hallucination within consumers’ tourism decision-making processes	2024
6	Scopus	Machine learning application to assess deforestation and wildfire levels in protected areas with tourism management	2023
7	Scopus	Business Plan Globetrot Plus Blockchain B2C Artificial Intelligence Solution for Tourism Industry	2023
8	Scopus	Biosecurity, crisis management, automation technologies and economic performance of travel, tourism and hospitality companies – A conceptual framework	2022
9	Scopus	Tourist Flow Projection in Response to Weather Variability for Sustainable Tourism and Management	2024
10	Scopus	Combination forecasting using multiple attribute decision making in tourism demand	2022
11	Scopus	THE APPLICATION OF MACHINE LEARNING METHODS IN DETERMINING ATTRACTIVE DEVELOPMENT DIRECTIONS FOR TOURISM BUSINESSES	2022
12	Scopus	Innovative design of digital neural network-based biodata integration technology in cultural tourism management: Insights from cellular molecular biomechanics perspective	2025
13	Scopus	Analysis of Rural Tourism Route Planning System Based on Artificial Intelligence Algorithm	2024
14	Scopus	Machine Learning based Big Data Analysis for Tourism Management Professional Ability Demand	2022
15	Scopus	Sustainable Adaptation Planning for Cultural Heritage in Coastal Tourism Destinations Under Climate Change: A Mixed-Paradigm of Preservation and Conservation Optimization	2024
16	Scopus	Smart Tourism Route Planning System Based on Machine Learning Algorithm	2022
17	Scopus	Deep LSTM Network for Word-of-Mouth Management of Rural Tourism	2022
18	Scopus	Enhancing tourism management through big data: Design and implementation of an integrated information system	2024
19	Scopus	Health Tourism Components and Intermediary Institutions as Supplier Businesses in the Context of Health 4.0	2023
20	Scopus	Digital entrepreneurship and technological transformation within the reach of risk management in tourism	2024
21	Scopus	Design and Planning of Tourism Path Based on Social Media Sharing Data Mining	2024
22	Scopus	A Text Classification in Tourism Reviews with the Hybrid Transformer-Attention Model in the Information Management of Smart Tourism	2025
23	Scopus	Research on the Management of Ecological Agricultural Characteristic Tourism Development Based on Artificial Intelligence Technology	2024
24	Scopus	Enhancing Inbound Tourism through the Taiwan Outdoor Project and AI-Enabled Chatbot Management	2023
25	Scopus	Why do social media users follow tourism-related posts? Roles of bloggers and posts in trip planning	2023
26	Scopus	Blockchain Propels Tourism Industry—An Attempt to Explore Topics and Information in Smart Tourism Management through Text Mining and Machine Learning	2023
27	Scopus	A MULTI-LEVEL DEEP NEURAL NETWORK-BASED TOURISM SUPPLY CHAIN RISK MANAGEMENT STUDY	2024
28	Scopus	Safety Risk Evaluation of Tourism Management System Based on PSO-BP Neural Network	2023
29	Scopus	Combine deep learning and LKH algorithm to solve multiconstraint tourism planning	2024
30	Scopus	ICT Adoption for Tourism Disaster Management: A Systematic Review	2022
31	Scopus	Optimization of CAD Application in Tourism Landscape Planning with Deep Learning	2025
32	Scopus	Application of Industry 3.5 approach for planning of more sustainable supply chain operations for tourism service providers	2023
33	Scopus	Tourism disaster management through chatbots as an alternative tool of communication	2023
34	Scopus	A Smart Tourism Resource Information Management Platform Based on Multi-Source Data Fusion	2024
35	Scopus	Autonomous Energy Management by Applying Deep Q-Learning to Enhance Sustainability in Smart Tourism Cities	2022
36	Scopus	Climate adaptation planning for cultural heritages in coastal tourism destinations: A multi-objective optimization approach	2022
37	Scopus	A critical reflection on analytics and artificial intelligence based analytics in hospitality and tourism management research	2023
38	Scopus	When artificial intelligence meets the hospitality and tourism industry: an assessment framework to inform theory and management	2022
39	Scopus	Disabilities and Accessible Tourism: Recent Development and Future Directions in Management Studies	2022
40	Scopus	Optimizing demand forecasting for business events tourism: a comparative analysis of cutting-edge models	2025
41	Scopus	Dynamic Monitoring Method of Rural Tourism Popularity Based on Big Data Management Technology	2022
42	Scopus	Construction of Instructional Quality Assessment Model of Tourism Management Specialty Based on BPNN Algorithm	2023
43	Scopus	A New Decision Support System for Enhancing Tourism Destination Management and Competitiveness	2024
44	Scopus	When ChatGPT Gives Incorrect Answers: The Impact of Inaccurate Information by Generative AI on Tourism Decision-Making	2025
45	Scopus	Beyond the storm: Harnessing AI for effective tourism crisis management	2024
46	Scopus	A large-scale decision-making model for the expediency of funding the development of tourism infrastructure in regions	2025
47	Scopus	Research on the Development of Digital Business Forecasting in the 'Commerce, Culture, and Tourism Plus' Model Based on Big Data and Predictive Models	2023
48	Scopus	CYBERSECURITY IN TOURISM AND HOSPITALITY MANAGEMENT RESEARCH: CURRENT ISSUES, TRENDS, AND AN AGENDA FOR FUTURE RESEARCH; [Ciberseguridad en la investigación en turismo y hotelería: temas de actualidad, tendencias y una agenda para futuras investigaciones]	2024
49	Scopus	Deep and organizational learning as innovation catalyzer in digital business ecosystems – a scenario analysis on the tourism destination Berlin	2024
50	Scopus	Research on Tourism Resources Management Method Based on Deep Learning and Knowledge Graph	2022
51	Scopus	The impact of artificial intelligence on the marketing performance of tourism and hospitality businesses: The mediating role of marketing innovation	2024
52	Scopus	Design of Tourism Information Management System Based on Fuzzy Clustering Algorithm	2023
53	Scopus	AI trust divide: How recruiter-candidate roles shape tourism personnel decision-making	2024
54	Scopus	Tourism Management with AI Integration for Mining Heritage: a Literature Review Approach	2024
55	Scopus	Effects of artificial intelligence on tourism business: How European hospitality industry responded	2024
56	Scopus	Tourism Information Management System Using Neural Networks Driven by Particle Swarm Model	2022
57	Scopus	Transforming the travel landscape: Smart contracts in tourism management	2024
58	Scopus	AI and the future of talent management in tourism and hospitality	2024
59	Scopus	Innovative Integration of Experiential Learning in Hospitality and Tourism Management Education: A Systematic Review	2024
60	Scopus	Research on Modeling of Influencing Factors of New Eco-tourism Management Based on Economic Fluctuation Prediction	2024
61	Scopus	Customized language models for tourism management: Implications and future research	2025
62	Scopus	Deep learning mechanism and big data in hospitality and tourism: Developing personalized restaurant recommendation model to customer decision-making	2024
63	Scopus	Potential of business intelligence and analytics on the performance of tourism and hospitality companies	2024
64	Scopus	The use of augmented reality technologies in tourism businesses from the perspective of UTAUT2	2023
65	Scopus	Data analysis framework of tourism enterprise human resource management system based on MySQL and fuzzy clustering	2023
66	Scopus	A New Predictive Algorithm for Time Series Forecasting Based on Machine Learning Techniques: Evidence for Decision Making in Agriculture and Tourism Sectors	2022
67	Scopus	Big Data and Cloud Computing- Integrated Tourism Decision-Making in Smart Logistics Technologies	2023
68	Scopus	Enhancing Minority Sentiment Classification in Gastronomy Tourism: A Hybrid Sentiment Analysis Framework with Data Augmentation, Feature Engineering and Business Intelligence	2024
69	Scopus	Harnessing appreciative inquiry in tourism planning: towards a strategy for poverty alleviation in marginalised communities	2024
70	Scopus	Trip Planner: A Big Data Analytics Based Recommendation System for Tourism Planning	2023
71	Scopus	Emotional arousal: how artificial intelligence-generated content influences tourism decision-making	2024
72	Scopus	Leveraging Digital Transformation in Marketing of Home-Stay Businesses to Promote Tourism: in the Hospitality Industry	2024
73	Scopus	Exploring the influence of artificial intelligence on the management of hospitality and tourism sectors: A bibliometric overview	2024
74	Scopus	Insight Analysis of Tourists' Behavior and Preference by Deep Learning in Tourism Destination Management	2023
75	Scopus	Design of Risk Management Decision-making Framework for Tourism Enterprises Based on Artificial Intelligence	2023
76	Scopus	Effects and potentials of business intelligence tools on tourism companies in a tourism 4.0 environment	2023
77	Scopus	Management and use of artificial intelligence for recovery in the Indian hospitality and tourism industry during COVID-19	2024
78	Scopus	Route Planning of Health Care Tourism Based on Computer Deep Learning	2022
79	Scopus	Algorithm of Scenic Spot Tourism Route Planning Based on Convolution Neural Network	2022
80	Scopus	Role of Artificial Intelligence in travel decision making and tourism product selling	2024
81	Scopus	Advantages of BP Neural Network in Sports Tourism Management System	2022
82	Scopus	Transforming medical tourism through an integrated business intelligence platform: Data-driven insights and healthcare industry impact	2024
83	Scopus	Sustainable planning of developing tourism destinations after COVID-19 outbreak: a deep learning approach	2024
84	Scopus	Spatial layout optimization model integrating layered attention mechanism in the development of smart tourism management	2024
85	Scopus	Strategic entrepreneurship and digital transformation to enhance the tourism performance management	2024
86	Scopus	Intelligent entertainment robots based on path navigation planning in tourism intelligent services and user entertainment experience analysis	2025
87	Scopus	Insights from sentiment analysis to leverage local tourism business in restaurants	2022
88	Scopus	How Artificial Intelligence Optimizes Customer Relationship Management in the Tourism Industry	2024
89	Scopus	Artificial intelligence innovation of tourism businesses: From satisfied tourists to continued service usage intention	2024
90	Scopus	Using the Fuzzy Method and Multi-Criteria Decision Making to Analyze the Impact of Digital Economy on Urban Tourism	2024
91	Scopus	Revitalizing Mining Heritage Tourism: A Machine Learning Approach to Tourism Management	2024
92	Scopus	Construction of Rural Tourism Brand Value Management Model from the Perspective of Big Data	2022
93	Scopus	Reflections of digital technologies on human resources management in the tourism sector	2024
94	Scopus	Emotion Recognition and Management in the Tourism Industry during Emergency Events Using Improved Convolutional Neural Network	2024
95	Scopus	Research on Carrying Capacity and Resource Management of Tourism Destinations Combined with Machine Learning	2023
96	Scopus	Identity and Access Management in Tourism and Hospitality	2024
97	Scopus	Research on Intelligent Tourism Marketing Management System Based on Mobile end of Computer Artificial Intelligence	2024
98	Scopus	The role of user-generated content in tourism decision-making: an exemplary study of Andalusia, Spain	2024
99	Scopus	Application of slam method in big data rural tourism management in dynamic scene	2023
100	Scopus	A Critical Insight into the Impact of Technology in Transformation of Tourist Business into Smart Tourism	2022
101	Scopus	Research on Tourism Management Decision Support System Based on IOT Technology	2021
102	Scopus	Design and Implementation of Tourism Information Management System Based on.NET	2021
103	Scopus	Digital supply chain management in the tourism and hospitality industry: Trends and prospects	2020
104	Scopus	Blended learning as a mover in the tourism&management study programme?	2017
105	Scopus	Intelligent advisory systems and information technology support for decision making in tourism	2015
106	Scopus	Enhancing decision making capacity in tourism domain using social media analytics	2018
107	Scopus	Integrated coastal-zone management for sustainable tourism using a decision support system based on system dynamics: A case study of Cijin, Kaohsiung, Taiwan	2018
108	Scopus	Application of an artificial neural network optimization model in e-commerce platform based on tourism management	2021
109	Scopus	Construction of Tourism Planning Information System Based on Ant Colony Algorithm	2020
110	Scopus	Promoting Effect of Artificial Intelligence Expert Decision-making Technology in Tourism Management Mechanism	2018
111	Scopus	Indigenous food recognition model based on various convolutional neural network architectures for gastronomic tourism business analytics	2021
112	Scopus	Design and Implementation of Self-service Tourism Management Information System Based on B/S Architecture	2021
113	Scopus	Research on Management Efficiency and Dynamic Relationship in Intelligent Management of Tourism Engineering Based on Industry 4.0	2022
114	Scopus	Sustainable Supply Chain Management Practices in the Hospitality and Tourism Sector in Africa	2021
115	Scopus	Data analytics supporting decision making in the tourism sector	2019
116	Scopus	Research on intelligent tourism management based on wireless network development	2019
117	Scopus	The implementation of leisure tourism enterprise management system based on deep learning	2021
118	Scopus	Research on Tourism Route Planning Based on Artificial Intelligence Technology	2021
119	Scopus	Design and Implementation of Tourism Management System Based on SSH	2021
120	Scopus	Data-Driven Business Analytics for the Tourism Industry in the UK: A Machine Learning Experiment Post-COVID	2021
121	Scopus	Intelligent content management system for tourism smart mobility: Approach and cloud-based android application	2019
122	Scopus	Decision Making on Tourism by Using Natural Language Processing	2022
123	Scopus	Exploration and Analysis of Tourism Marketing Management Innovation Based on Big Data	2021
124	Scopus	Traffic Forecasting and Decision-making of Investment and Construction of Tourism Highway under the Background of Artificial Intelligence	2020
125	Scopus	Artificial neural-network-based emotion classification in the online media for tourism businesses	2018
126	Scopus	Tourism destination management using sentiment analysis and geo-location information: a deep learning approach	2021
127	Scopus	An Application of Knowledge Management System for Tourism Regions	2017
128	Scopus	Management of tourism resources and demand based on neural networks	2015
129	Scopus	Analytical study on use of AI techniques in tourism sector for smarter customer experience management	2020
130	Scopus	Megapolis tourism development strategic planning with cognitive modelling support	2020
131	Scopus	Platform construction and application research based on the smarter tourism tmca (Traffic management contractors association) system	2016
132	Scopus	Safety Risk Assessment of Tourism Management System Based on PSO-BP Neural Network	2021
133	Scopus	Gaussian processes for daily demand prediction in tourism planning	2020
134	Scopus	Design of tourism resources management based on artificial intelligence	2017
135	Scopus	What makes tourists feel negatively about tourism destinations? Application of hybrid text mining methodology to smart destination management	2017
136	Scopus	Analysis of tourist satisfaction in tourism supply chain management	2018
137	Scopus	Information model of decision-making in management regional tourism	2017
138	Scopus	Construction of Tourism Management Information System Based on Django	2022
139	Scopus	Tourism sustainability in Tibet - Forward planning using a systems approach	2015
140	Scopus	Can empirically based model results be fed into mathematical models? MCE for neural network and logistic regression in tourism landscape planning	2020
141	Scopus	An AI application to integrated tourism planning	2015
142	Scopus	Sharing Tourism and Its Impact on Hospitality Management in Essaouira: Analysis of the Evolution of Booking.com and Airbnb	2020
143	Scopus	Study of Iterative Learning Control Algorithm in Tourism Management IoT Platform Application	2021
144	Scopus	Application of DASH client optimization and artificial intelligence in the management and operation of big data tourism hotels	2022
145	Scopus	Information Systems for Cultural Tourism Management Using Text Analytics and Data Mining Techniques	2022
146	Scopus	Intelligence in tourism management: A hybrid FOA-BP method on daily tourism demand forecasting with web search data	2019
147	Scopus	Tourism Demand Forecast Based on Adaptive Neural Network Technology in Business Intelligence	2022
148	Scopus	Big data as a game changer: How does it shape business intelligence within a tourism and hospitality industry context?	2019
149	Scopus	Machine Learning in a Policy Support System for Smart Tourism Management	2022
150	Scopus	BloHosT: Blockchain enabled smart tourism and hospitality management	2019
151	Web of science	Design of Risk Management Decision-making Framework for Tourism Enterprises Based on Artificial Intelligence	2023	Duplicado
152	Web of science	A critical reflection on analytics and artificial intelligence based analytics in hospitality and tourism management research	2023	Duplicado
153	Web of science	Understanding the role and impact of Generative Artificial Intelligence (AI) hallucination within consumers' tourism decision-making processes	2024	Duplicado
154	Web of science	AI and the future of talent management in tourism and hospitality	2024	Duplicado
155	Web of science	AI trust divide: How recruiter-candidate roles shape tourism personnel decision-making	2024	Duplicado
156	Web of science	An AI Application to Integrated Tourism Planning	2015	Duplicado
157	Web of science	Machine Learning in a Policy Support System for Smart Tourism Management	2022	Duplicado
158	Web of science	Role of Artificial Intelligence in travel decision making and tourism product selling	2024	Duplicado
159	Web of science	Design of tourism resources management based on artificial intelligence	2017	Duplicado
160	Web of science	Smart Tourism Route Planning System Based on Machine Learning Algorithm	2022	Duplicado
161	Web of science	Tourism destination management using sentiment analysis and geo-location information: a deep learning approach	2021	Duplicado
162	Web of science	Research on Carrying Capacity and Resource Management of Tourism Destinations Combined with Machine Learning	2023	Duplicado
163	Web of science	Data-Driven Business Analytics for the Tourism Industry in the UK: A Machine Learning Experiment Post-COVID	2021	Duplicado
164	Web of science	Application of DASH client optimization and artificial intelligence in the management and operation of big data tourism hotels	2022	Duplicado
165	Web of science	When ChatGPT Gives Incorrect Answers: The Impact of Inaccurate Information by Generative AI on Tourism Decision-Making	2025	Duplicado
166	Web of science	Deep and organizational learning as innovation catalyzer in digital business ecosystems - a scenario analysis on the tourism destination Berlin	2024
167	Web of science	Global Multi-Source Information Fusion Management and Deep Learning Optimization for Tourism: Personalized Location-Based Service	2022
168	Web of science	Research on Tourism Resources Management Method Based on Deep Learning and Knowledge Graph	2022	Duplicado
169	Web of science	Sketch of a Decision-Support System to Improve the Management of Tourism Destinations	2024
170	Web of science	Machine learning application to assess deforestation and wildfire levels in protected areas with tourism management	2023	Duplicado
171	Web of science	Deep learning mechanism and big data in hospitality and tourism: Developing personalized restaurant recommendation model to customer decision-making	2024	Duplicado
172	Web of science	Enhancing Decision Making Capacity in Tourism Domain Using Social Media Analytics	2018	Duplicado
173	Web of science	Research on Management Efficiency and Dynamic Relationship in Intelligent Management of Tourism Engineering Based on Industry 4.0	2022	Duplicado
174	Web of science	Tourism Information Management System Using Neural Networks Driven by Particle Swarm Model	2022	Duplicado
175	Web of science	Balancing Privacy and Planning: Using Counterfactuals to Predict and Optimize Tourism in Wakayama City	2024
176	Web of science	Customized language models for tourism management: Implications and future research	2025	Duplicado
177	Web of science	Enhancing Minority Sentiment Classification in Gastronomy Tourism: A Hybrid Sentiment Analysis Framework With Data Augmentation, Feature Engineering and Business Intelligence	2024	Duplicado
178	Web of science	Combination forecasting using multiple attribute decision making in tourism demand	2022	Duplicado
179	Web of science	Biosecurity, crisis management, automation technologies and economic performance of travel, tourism and hospitality companies - A conceptual framework	2022	Duplicado
180	Web of science	The role of user-generated content in tourism decision-making: an exemplary study of Andalusia, Spain	2024	Duplicado
181	Web of science	Intelligent Content Management System for Tourism Smart Mobility: Approach and Cloud-based Android Application	2019	Duplicado
182	Web of science	The Application of RSA Encryption Algorithm in the Hainan Rural Tourism Management Platform	2017
183	Web of science	DATA MINING TOURISM PATTERNS Call Detail Records as Complementary Tools for Urban Decision Making	2017
184	Web of science	Intelligent entertainment robots based on path navigation planning in tourism intelligent services and user entertainment experience analysis	2025	Duplicado
185	Web of science	Using Big Data and Empirical Analysis to Optimize The Decision-Making of Smart City Tourism Logistics Service System	2022
186	Web of science	Application of slam method in big data rural tourism management in dynamic scene	2023	Duplicado
187	Web of science	Research on intelligent tourism management based on wireless network development	2019	Duplicado
188	Web of science	What makes tourists feel negatively about tourism destinations? Application of hybrid text mining methodology to smart destination management	2017	Duplicado
189	Web of science	Climate adaptation planning for cultural heritages in coastal tourism destinations: A multi-objective optimization approach	2022	Duplicado
190	Web of science	Using the Fuzzy Method and Multi-Criteria Decision Making to Analyze the Impact of Digital Economy on Urban Tourism	2024	Duplicado
191	Web of science	Sharing Tourism and Its Impact on Hospitality Management in Essaouira: Analysis of the Evolution of Booking.com and Airbnb	2020	Duplicado
192	Web of science	Sustainable Adaptation Planning for Cultural Heritage in Coastal Tourism Destinations Under Climate Change: A Mixed-Paradigm of Preservation and Conservation Optimization	2024	Duplicado
193	Web of science	BloHosT: Blockchain Enabled Smart Tourism and Hospitality Management	2019	Duplicado
194	Web of science	Why do social media users follow tourism-related posts? Roles of bloggers and posts in trip planning	2023	Duplicado
195	Web of science	A Bibliometric Review of Revenue Management in the Tourism and Hospitality Industry, 1989-2021	2023
196	Web of science	Application of Industry 3.5 approach for planning of more sustainable supply chain operations for tourism service providers	2023	Duplicado
197	Web of science	Integrating a Tourism Service Quality Evaluation Linguistic Multi-criteria Decision Making Model into a Relational Database Management System	2018
198	Web of science	Spatial layout optimization model integrating layered attention mechanism in the development of smart tourism management	2024	Duplicado
199	Web of science	BITOUR: A Business Intelligence Platform for Tourism Analysis	2020
200	Web of science	Autonomous Energy Management by Applying Deep Q-Learning to Enhance Sustainability in Smart Tourism Cities	2022	Duplicado
201	Web of science	Emotion Recognition and Management in the Tourism Industry During Emergency Events Using Improved Convolutional Neural Network	2024	Duplicado
202	Web of science	2nd GLOBAL CONFERENCE on BUSINESS, ECONOMICS, MANAGEMENT and TOURISM, 30-31 October 2014, Prague, Czech Republic	2015
203	Web of science	Performance Evaluation of Tourism Human Resource Management Based on Fuzzy Data Mining	2022
204	Web of science	A Novel Method for Determining Tourism Carrying Capacity in a Decision-Making Context Using q-Rung Orthopair Fuzzy Hypersoft Environment	2024
205	Web of science	Enogastronomic Tourism: can it mitigate the Intangibility of the Destination? Streetfood as a new Business Model for the Management of Tourist Regions	2016
206	Web of science	Nutrition Software to the Management and Support of Health and Wellness Tourism: An Approach	2024
207	Web of science	Financial Management Policy and Governance for the Preservation of the UNESCO World Heritage Site in Malaysia as a Tourism Attraction	2024
208	Web of science	Interoperable Multi-Blockchain Platform Based on Integrated REST APIs for Reliable Tourism Management	2021
209	Web of science	Business Cycle of International Tourism Demand in Thailand: A Markov-Switching Bayesian Vector Error Correction Model	2015
210	Web of science	Multivariate Higher Order Information for Emergency Management Based on Tourism Trajectory Datasets	2016
211	Web of science	Halal Tourism: A Debate Between Its Religious Values and Business Interest; A Case of Malaysia	2023
212	Web of science	Edco-tourism; A Coastal Management Program to Improve Social Economics	2018
213	Web of science	HUMAN RESOURCES MANAGEMENT FOR TOURISM AND HOSPITALITY INDUSTRY IN RUSSIA	2018
214	Web of science	Improvement of the Marketing Management System of Tourism and Hospitality Industry Enterprises on the Basis of Innovations	2023
215	Web of science	The Cultural Tourism Management under Context of World Heritage Sites: Stakeholders' Opinions between Luang Prabang Communities, Laos and Muang-kao Communities, Sukhothai, Thailand	2015
216	Web of science	Building tourism SMEs' business resilience through adaptive capability, supply chain collaboration and strategic human resource	2024
217	Web of science	Small and medium-size enterprises' business performance in tourism industry: the mediating role of innovative practice and moderating role of government support	2021
218	Web of science	The impact of social changes on MICE tourism management in the age of digitalization: a bibliometric review	2024
219	Web of science	TOURISM OUTSIDE THE ARCTIC CIRCLE TERRITORY: THE EXPERIENCE OF CREATION AND MANAGEMENT BY TOURIST SERVICES	2016

## Sheet: Selected
		Title	Year	Abstract	Author Keywords	Revisor	Motivo	Arbitraje	Motivo2	Desición Final	Motivo3
1	Scopus	Embracing the future of interactive marketing with contactless technology: evidence from tourism businesses	2024	Purpose: This study explores how predictor variables (value congruence and customer–AI-assisted exchanges) lead tourism businesses to meet customer needs through contactless technology and enhance their willingness to pay more. Design/methodology/approach: The research model was designed from the perspective of consumer-brand relationships and acceptance of AI device use. This study collected and…	AI device use acceptance; Consumer-brand relationships; Contactless technology; Intimacy; Willingness to pay more	SI	Propone sistemas de IA para comprender y responder adecuadamente a las consultas, necesidades y preferencias de los clientes	SI	Propone intercambios asistidos por IA
2	Scopus	APPLICATION OF ANN IN TOURISM BUSINESS DEVELOPMENT FOR DEMAND FORECASTING AND MANAGEMENT OF TOURISM HEADCOUNT	2024	With the rapid development of tourism, it is imperative to forecast tourism demand to maintain the long-term stable development of the tourism industry and make good planning for future tourism enterprises. The study uses the classical model of artificial neural network-BP neural network for tourism number demand prediction, given the problems of traditional BP neural networks, such as prematurit…	BP neural network; demand forecasting; immune particle swarm; tourism enterprises	SI	Utiliza la IA para pronosticar la demanda turística	SI	Aplica redes neuronales artificiales
3	Scopus	The Convolutional Neural Network Text Classification Algorithm in the Information Management of Smart Tourism Based on Internet of Things	2024	The relentless progression of advanced technologies has driven the seamless integration of Internet of Things (IoT) services into the fundamental framework of contemporary tourism enterprises. In the quest for valuable insights from the vast reservoir of tourism data, this study employs a Convolutional Neural Network (CNN) as its primary instrument, culminating in the development of a Convolution…	accuracy; Convolutional neural network; F1 value; information management; smart tourism; text classification algorithm	SI	Utiliza la IA para identificar emociones y sentimientos en los turistas	SI	Aplica redes neuronales artificiales
4	Scopus	Artificial Intelligence and Sustainable Tourism Planning: A Hetero-Intelligence Methodology Proposal; [Inteligencia Artificial y Planificación Turística Sostenible: Una propuesta de Metodología Hetero-inteligente]	2024	This study explores the growing significance of Large Language Models (LLMs) in tourism, for their current and potential applications. It aims to achieve two primary objectives: first, to develop a novel hetero-intelligence framework merging human and artificial intelligence (AI) to address contemporary sustainability challenges in tourism; second, to validate this framework by applying it to sus…	ChatGPT; Conversational generative AI; Hetero-intelligent performance testing; Human intelligence; Large language models; Sustainable tourism planning	SI	Propone el uso de Inteligencia artificial para el turismo sostenible	SI	Analiza los modelos de lenguaje a gran escala (LLM) en el turismo
5	Scopus	Understanding the role and impact of Generative Artificial Intelligence (AI) hallucination within consumers’ tourism decision-making processes	2024	ChatGPT, which launched only a year ago, is the fastest-growing website in the world today. When generative AI software such as ChatGPT generates ideas for people, they often generate false ideas. This occurrence has been called ‘AI Hallucination’. It can include generating false text output that is extremely believable to completely gibberish. This source of potential misinformation has signific…	challenges in technology usage in tourism; ChatGPT; Generative Artificial Intelligence (AI); hallucination misinformation; Technology Acceptance Model (TAM); tourism behaviour	SI	Analiza el uso de ChatGPT en la industria de viajes y turismo.	SI	Propone utilizar plataformas de IA generativa como ChatGPT
6	Scopus	Machine learning application to assess deforestation and wildfire levels in protected areas with tourism management	2023	This study aims to identify the influence of management plans, management boards and tourism management on the relationship between performance indicators in the management of protected areas and degradation processes. To understand these relationships, 283 protected areas (PAs) in Brazil were analyzed. The first stage of the research used classification models based on machine learning algorithm…	Control policy; Effectiveness; Forest; Governance; Management board; Management plan	SI	Utiliza algoritmos de aprendizaje automático para la gestion del turismo	SI	Utiliza algoritmos de clasificación de datos
7	Scopus	Business Plan Globetrot Plus Blockchain B2C Artificial Intelligence Solution for Tourism Industry	2023	Travel is the ideal outcome for online diffusion. Unlike buying in most industries, the travel trade implicates the exchange, not physical inventory; however, it demands information. The tourist must select from many imaginable products, services, and fees that may differ with the minor adjustment of any parameters. Suppose, for example, a one-way airplane ticket. That ticket, for the same seat o…	Artificial intelligence; B2C; Blockchain; Tourism industry	SI	Plan de negocios de turismo usando IA	SI	Propone soluciónes Blockchain combinadas con IA
8	Scopus	Biosecurity, crisis management, automation technologies and economic performance of travel, tourism and hospitality companies – A conceptual framework	2022	The COVID-19 pandemic of 2020 will have a significant influence on travel, tourism and hospitality (TTH) globally. With a massive reduction in tourism globally because of the health crisis, the industry will have to plan recovery and rebuilding of the industry with greater consideration of the biosecurity of customers. A critical element in the reorganisation of the industry will involve the incr…	artificial intelligence; biosecurity; COVID-19; crisis management; economic performance; pandemic; service automation; service robots	SI	Propone automatización para la seguridad y la salud del consumidor	SI	Popone la automatización en la industria turistica
9	Scopus	Tourist Flow Projection in Response to Weather Variability for Sustainable Tourism and Management	2024	To implement strategies to reduce environmental impact while optimizing infrastructure and enhancing the overall visitor experience, there is a need to analyze and comprehend the patterns of tourist flow. In addition, weather variability can significantly impact the number of tourists visiting a destination. Thus, when analyzing tourist flows, it is essential to take account of weather variations…	AI in Tourism; Resilient Management Strategies; Sustainable Tourism; Tourist Flow Analysis	SI	Utiliza la IA para pronosticar la demanda turística	SI	Aplica el algoritmo LightGBM
10	Scopus	Combination forecasting using multiple attribute decision making in tourism demand	2022	Purpose: This study aims to address three important issues of combination forecasting in the tourism context: reducing the restrictions arising from requirements related to the statistical properties of the available data, assessing the weights of single models and considering nonlinear relationships among combinations of single-model forecasts. Design Methodology Approach: A three-stage multiple…	Artificial intelligence; Forecast combination; Grey prediction; Multiple attribute decision-making; Tourism demand	SI	Utiliza la IA para pronosticar la demanda turística	SI	Aplica el algoritmo decisiones de atributos múltiples (MADM)
11	Scopus	THE APPLICATION OF MACHINE LEARNING METHODS IN DETERMINING ATTRACTIVE DEVELOPMENT DIRECTIONS FOR TOURISM BUSINESSES	2022	This paper proposes a methodical approach to the selection of attractive development directions for tourism businesses. The approach is based on the following machine learning methods: "center of gravity" method; taxonomic indicator of the level of development; hierarchical agglomerative and iterative methods of cluster analysis; methods for analyzing panel data; and Kohonen neural networks. The …	attractiveness assessment; development; machine learning; tourism business; tourism product	SI	Identifica sitios para mayor desarrollo turísico mediante aprendizaje automático	SI	Menciona y aplica diversos métodos de aprendizaje automático
12	Scopus	Innovative design of digital neural network-based biodata integration technology in cultural tourism management: Insights from cellular molecular biomechanics perspective	2025	Based on the related feature selection algorithm, this paper builds the basic framework of the multi-strategy method of Fastest Virtual Reality (FVR) feature selection algorithm, and obtains the final collection of biometric data after feature dimensionality reduction and removal of redundant feature values.In the context of cellular molecular biomechanics, the retina sampling network's extractio…	biometric data; cellular molecular biomechanics; FVR feature selection algorithm; Gabor filtering; RBF network structure model	SI	Utiliza la IA para identificar emociones y sentimientos en los turistas	SI	Menciona y aplica diversos métodos de aprendizaje automático
13	Scopus	Analysis of Rural Tourism Route Planning System Based on Artificial Intelligence Algorithm	2024	Under the background of the era of tourism informatization and Artificial Intelligence (AI), higher requirements are adopted for the route planning of scenic spots. In this paper, in the rural tourism route planning system based on artificial intelligence algorithm, the rural tourism route planning system based on artificial intelligence algorithm is registered, and the information of scenic spot…	artificial intelligence algorithms; percapita tourism consumption; route planning systems; Rural tourism; tourist attributes	SI	sistema de planificación de rutas de turismo rural basado en algoritmos de inteligencia artificial	SI	Propone algoritmos de inteligencia artificial
14	Scopus	Machine Learning based Big Data Analysis for Tourism Management Professional Ability Demand	2022	In recent years, the development of the tourism industry presents a new trend, which brings new challenges to students' training in tourism management major. In this context, analyzing the characteristics and structure of tourism management professionals vocational ability demand is the primary part of tourism management professionals' training. In this paper, the crawler software is used to obta…	big data; professional ability demand; Professional training; tourism management specialty	SI	Utiliza la IA para indentificaar la demanda de profesioales en el área turística	SI	Menciona y aplica diversos métodos de aprendizaje automático
15	Scopus	Sustainable Adaptation Planning for Cultural Heritage in Coastal Tourism Destinations Under Climate Change: A Mixed-Paradigm of Preservation and Conservation Optimization	2024	Fragmented guidance and unbalanced climate adaptation efforts for tangible and intangible cultural heritage are challenging the long-term sustainability of coastal tourism destinations. Conceptualizing and quantifying adaptation paradigms that optimize cultural heritage preservation from multi-faceted perspectives under fiscal constraints is highly prioritized by coastal tourism destinations. Inf…	Climate adaptation planning; coastal tourism destinations; cultural heritage; national parks; preservation optimization; Sustainable Development Goals (SDGs)	SI	Propone el uso de Inteligencia artificial para el turismo sostenible	SI	Puede contibuir con las preguntas de investigación
16	Scopus	Smart Tourism Route Planning System Based on Machine Learning Algorithm	2022	With the development of economy and the improvement of life quality, people have a deeper pursuit. Therefore, tourism has developed into one of the pillar industries of China's economy. Tourism has gradually become an important part of people's life and entertainment, but people's tourism consumption behavior has undergone significant changes, and they have a higher standard for tourism quality, …	machine learning algorithm; route planning system; smart tourism; tourism industry	SI	Propone rutas de Turismo basado en aprendizaje automático	SI	Propone algoritmo de aprendizaje automático para satisfacer las necesidades diversificadas de los turistas
17	Scopus	Deep LSTM Network for Word-of-Mouth Management of Rural Tourism	2022	With the development of tourism, rural tourism as an industry with great development potential is gradually attracting urban consumers. Considering the differences between different types of rural tourism, I refine it at the visitor level to balance the differences in visitor groups of different types of rural tourism. I propose an improved LSTM framework for rural tourism theme feature extractio…		SI	Propone IA para la extracción de características temáticas del turismo rural.	SI	Utiliza redes neuronales artificiales
18	Scopus	Enhancing tourism management through big data: Design and implementation of an integrated information system	2024	Many sectors, particularly traveling, have been profoundly affected by the fast development of big data technologies. This article provides a detailed examination of the development and execution of a Tourism Management Information System (TMIS) that utilizes big data analytics to improve operational effectiveness, gain insights into tourist behavior, and encourage sustainable tourism practices. …	Big data technology; Decision making; Tourism industry; Tourism management information system	SI	Analiza las tecnologías de big data en la gestión turística	SI	Propone la inteligencia artificial, para experiencias personalizadas deturistas
19	Scopus	Health Tourism Components and Intermediary Institutions as Supplier Businesses in the Context of Health 4.0	2023	The desire to be healthy, which is among the reasons that lead people to tourism, has turned into a large sector in which many people and institutions operate. In this sector called health tourism, intermediary organizations that can act on behalf of service recipients by directing them and providing service logistics play an important role. The destinations that can be determined in the alternat…	Health 4.0; Health tourism; Intermediary institutions in health tourism; Medical tourism; Service providers in health tourism; Supplier businesses in health tourism; Technology 4.0	SI	Propone varias tecnologias para el turismo de salud	SI	menciona la la inteligencia artificial, el análisis de big data, el Internet de las cosas y la realidad aumentada.
20	Scopus	Digital entrepreneurship and technological transformation within the reach of risk management in tourism	2024	The dynamics of digital transformations and the impact of the activities developed by the tourism industry and the people who consume its goods and services, make it necessary to have tools that contribute to risk management in tourism. Therefore, this research is based on a theoretical approach to digital entrepreneurship and technological transformations that are available to the tourism sector…	Artificial Intelligence; Bibliometrics; Digital Entrepreneurship; Technological Transformation; Tourism Risk Management	SI	Menciona tecnologías aplicadas a la actividad turística	SI	Machine Learning, Inteligencia Artificial, Algoritmo Genético, Series de Tiempo Difusas, entre otras,
21	Scopus	Design and Planning of Tourism Path Based on Social Media Sharing Data Mining	2024	In recent years, along with the rapid development of artificial intelligence, big data and social media, informatization in the tourism industry also shows an explosive trend. This paper constructs a tourism path planning system based on data mining technology and the selection method of the optimal path. The GS algorithm is used to optimize the SVM algorithm to form the GS-SVM fusion algorithm, …	Data mining; GS; Path planning; SVM	SI	Utiliza la tecnología de minería de datos para la selección de la ruta óptima, en turismo	SI	Utiliza el algoritmo SVM para formar el algoritmo de fusión GS-SVM
22	Scopus	A Text Classification in Tourism Reviews with the Hybrid Transformer-Attention Model in the Information Management of Smart Tourism	2025	In the realm of smart tourism, understanding tourist feedback through sentiment analysis is pivotal for enhancing service quality and experience. This study introduces a novel Hybrid Transformer-Attention Model (HTAM), designed to advance sentiment classification accuracy, model interpretability, and linguistic adaptability in tourist reviews. By integrating the contextual insights of transformer…	Hybrid transformer-attention model (HTAM); Machine learning in hospitality; Sentiment analysis; Smart tourism	SI	Utiliza la IA para mejorar el proceso de reseñas tusísticas	SI	Utiliza redes neuronales convolucionales con memoria a corto y largo plazo bidireccional
23	Scopus	Research on the Management of Ecological Agricultural Characteristic Tourism Development Based on Artificial Intelligence Technology	2024	Eco-agricultural characteristic tourism is one of the important contents of China's tourism research, and is also one of the important initiatives to solve the "three rural problems"and realize comprehensive well-off. This paper proposes a particle algorithm-optimized RBF neural network model based on a neural network, which greatly overcomes the defects of its busy convergence speed and complex …	Ecological agriculture; Particle swarm algorithm; RBF neural network; Tourism management	SI	Utiliza la IA para analizar y mejorar el turismo ecoagrícola	SI	Utiliza redes neuronales artificiales
24	Scopus	Enhancing Inbound Tourism through the Taiwan Outdoor Project and AI-Enabled Chatbot Management	2023	In recent years, the global tourism industry has faced unprecedented challenges due to the COVID-19 pandemic. Taiwan, like many other countries, experienced a significant decrease in inbound tourism. However, an innovative project called Taiwan Outdoor emerged, aiming to leverage AI technology and its AI-enabled chatbot to support inbound tourism by providing enhanced services to foreign expatria…	AI-Enabled Chatbot management; Inbound tourism; Parkbus service; Taiwan Outdoor project	SI	Propone el uso de chatbots para mejorar la comuncación turística	SI	Propone la IA para brindar recomendaciones personalizadas
25	Scopus	Why do social media users follow tourism-related posts? Roles of bloggers and posts in trip planning	2023	Purpose: More people share their tourism experiences on social media today than in the past, and as a result, more people follow these posts in their trip planning. However, studies into tourists' intention to follow such posts are scarce. Therefore, this study investigates the antecedents influencing social media users' intentions to follow tourism-related posts (TRPs) when planning their trips.…	Online consumer behavior; Online marketing; Social media advertising; Social media marketing; Tourism marketing	SI	Utiliza la IA para identificar preferencias turísticas	SI	Utiliza redes neuronales artificiales
26	Scopus	Blockchain Propels Tourism Industry—An Attempt to Explore Topics and Information in Smart Tourism Management through Text Mining and Machine Learning	2023	Blockchain and immersive technology are the pioneers in bringing digitalization to tourism, and researchers worldwide are exploring many facets of these techniques. This paper analyzes the various aspects of blockchain technology and its potential use in tourism. We explore high-frequency keywords, perform network analysis of relevant publications to analyze patterns, and introduce machine learni…	artificial intelligence; bibliometrics; blockchain in tourism; machine learning; smart tourism; text analysis; topic modeling	SI	Aplica la minería de texto y aprendizaje automático para la gestión turistíca	SI	Puede contibuir con las preguntas de investigación
27	Scopus	A MULTI-LEVEL DEEP NEURAL NETWORK-BASED TOURISM SUPPLY CHAIN RISK MANAGEMENT STUDY	2024	With the rapid advancement of the tourism, the capital demand of tourism enterprises has gradually risen, but the confusion of market management has increased the difficulty of risk assessment of tourism enterprises by financial institutions, which has led to difficulties in financing tourism enterprises and seriously hindered their development. On this basis, this research first analyses the ris…	Finance; Multilevel Deep Neural Networks; Risk Management; Tourism	SI	Analiza y evalua la cadena de suministro turístico (TSC) mediante aprendizaje automático	SI	Utiliza redes neuronales artificiales
28	Scopus	Safety Risk Evaluation of Tourism Management System Based on PSO-BP Neural Network	2023	With the recovery of the tourism industry and the development of the field of artificial intelligence, the application of intelligent neural network technology to management systems for safety risk assessment is the choice of the times and an urgent real need for relevant practitioners. In this study, the BP neural network algorithm is used as a tool for safety evaluation of the tourism managemen…		SI	Analiza los riesgos de seguridad en la gestión del turismo mediante IA	SI	Utiliza redes neuronales artificiales
29	Scopus	Combine deep learning and LKH algorithm to solve multiconstraint tourism planning	2024	Multi-constraint travel route planning is a challenging problem, which involves multiple constraints such as transportation, time, cost and traveler preference. In recent years, the development of deep learning technology has provided new possibilities to solve this problem. In this paper, a method combining deep learning and LKH algorithm is proposed to solve the multi-constraint tourism plannin…	Deep learning; multi-constraint; Travel routes	SI	Utiliza la IA para la planificación de rutas de viaje	SI	Combina el aprendizaje profundo y el algoritmo LKH, Utiliza redes neuronales artificiales
30	Scopus	ICT Adoption for Tourism Disaster Management: A Systematic Review	2022	The tourism sector is not new to disruptions from natural disasters or human induced crises and has been recalibrating the way they operate and sustain. The scale and impact of the COVID-19 pandemic has highly impacted global tourism and the economies that rely on tourism. It has brought phenomenal challenges to humankind and many tourism organisations are on the brink of collapse and this will h…	COVID-19; Disaster Management; ICT Adoption; Tourism	SI	Analiza el uso de las TIC y las herramientas asociadas para la gestión de desastres turísticos	SI	Menciona la realidad virtual, las guías virtuales, los chatbots, las redes sociales y las aplicaciones de rastreo
31	Scopus	Optimization of CAD Application in Tourism Landscape Planning with Deep Learning	2025	With the development of the economy and society, people's living standards continue to improve. Traditional tourism landscape and scenic area planning can not meet people's spirit and modern needs; the tourism industry, in order to develop in the long run, must adjust the tourism landscape planning and design from the perspective of tourists. This paper is based on a deep learning algorithm to op…	CAD Technology; Deep Learning; Planning and Design; Three-Dimensional Modeling; Tourist Landscape	SI	Utiliza aprendizaje profundo para optimizar la aplicación dela tecnología CAD en la planificación del paisaje turístico.	SI	Puede contibuir con las preguntas de investigación
32	Scopus	Application of Industry 3.5 approach for planning of more sustainable supply chain operations for tourism service providers	2023	This paper addresses a tourist trip design problem and a tour route planning problem to improve the competitiveness of community tourism. The problem was investigated with the objective to maximise the total number of tourists interested in visiting multiple points of interest and several specific activities to receive a satisfactory service by matching their preferences. The problem was formulat…	AI heuristics for optimisation; Industry 3.5; sustainable supply chain management; Tourism industry	SI	Utiliza la IA programar y secuenciar el viaje y la planificación de rutas para los turistas	SI	Utiliza el algoritmo Kvariable y búsqueda de vecindarios de variable aleatoria (MDE-RVNS)
33	Scopus	Tourism disaster management through chatbots as an alternative tool of communication	2023	Information and Communication Technologies has revolutionized the hospitality and tourism sector. Artificial Intelligence (Al) and Machine Learning Technology (MLT) are widely popular and can be of assistance to reduce the impact of disasters by providing accurate, brief, and updated information. It also facilitates predicting and executing plans in managing crises to lessen losses. Chatbot can s…	Artificial intelligence chatbots; Disaster risk reduction and management; Information and Communication Technology; SWOC analysis; Tourism	SI	Propone utilizar la IA para mejorar la comunicación turistica	SI	Propone chatbots con IA para la notificación de emergencias y la toma de desciciones en turismo
34	Scopus	A Smart Tourism Resource Information Management Platform Based on Multi-Source Data Fusion	2024	Leveraging multiple data sources to enhance tourism resource management and visitor behavior analysis has become a key challenge in the context of the booming smart tourism industry. In this study, we explore how to integrate and optimize multiple data sources including social media activities, user reviews, tourism statistics, and geographic information to build a comprehensive information manag…	behavior analysis; data fusion; multi-source data; resource management; Smart tourism	SI	Propone la plataforma integral de gestión de información para los recursos turísticos inteligentes	SI	Puede contibuir con las preguntas de investigación
35	Scopus	Autonomous Energy Management by Applying Deep Q-Learning to Enhance Sustainability in Smart Tourism Cities	2022	Autonomous energy management is becoming a significant mechanism for attaining sustainability in energy management. This resulted in this research paper, which aimed to apply deep reinforcement learning algorithms for an autonomous energy management system of a microgrid. This paper proposed a novel microgrid model that consisted of a combustion set of a household load, renewable energy, an energ…	Autonomous energy; Deep Q-learning; Energy management; Smart city; Smart tourism; Sustainability	SI	Propone utilizar la IA para mejorar la sostenibilidad en las ciudades turísticas inteligentes	SI	Propone el aprendizaje profundo Q-Learning
36	Scopus	Climate adaptation planning for cultural heritages in coastal tourism destinations: A multi-objective optimization approach	2022	Substantial climate change impacts threaten the persistence of cultural resources globally. The need exists for conceptualizing decision support tools that focus on quantifying and optimizing the managerial priorities to leverage historic preservation and adaptation actions that enhance the continuity of heritage values and sites. Informed by the Structured Decision Making (SDM) approach, this st…	Climate change; Cost-efficiency; Cultural resource management; Decision support tools; Historic buildings; Historic preservation; Machine learning	SI	Propone una herramienta de apoyo a la toma de decisiones relacionadas al turismo	SI	Puede contibuir con las preguntas de investigación
37	Scopus	A critical reflection on analytics and artificial intelligence based analytics in hospitality and tourism management research	2023	Purpose: This work consists of a critical reflection on the extent to which hospitality and tourism management scholars have accurately used the term “analytics” and its five types (i.e. descriptive, exploratory, predictive, prescriptive and cognitive analytics) in their research. Only cognitive analytics, the latest and most advanced type, is based on artificial intelligence (AI) and requires ma…	Analytics; Artificial intelligence; Big data; Cognitive analytics; Hospitality; Tourism	SI	Analítica basada en inteligencia artificial para la gestión hotelera y turística	SI	Puede contibuir con las preguntas de investigación
38	Scopus	When artificial intelligence meets the hospitality and tourism industry: an assessment framework to inform theory and management	2022	Purpose: This study reviews existing research and current applications of artificial intelligence (AI) in the hospitality and tourism industry. It further proposes a new evaluation framework to inform the susceptibility of AI adoptions. Design/methodology/approach: This is a synthesis and evaluation study that qualitatively summarizes and presents findings on AI applications in the hospitality an…	Artificial intelligence; Augmented reality; Deep learning; Innovations diffusion; Machine learning; Technology adoption; Virtual reality	SI	Investiga las aplicaciones actuales de la IA en la industria de la hospitalidad y el turismo	SI	Menciona a agentes virtuales y chatbot
39	Scopus	Disabilities and Accessible Tourism: Recent Development and Future Directions in Management Studies	2022	This chapter uses bibliometrics and topic modeling to explore the accessible tourism research domain structure and builds on this result to adjust its scope and applications in management fields. As far as bibliometrics is concerned, the co-authorship analysis highlights the field’s invisible college by identifying the most impactful scholars in the research area and the degree of their collabora…		NO	Se enfoca en la gestión d turismo accesible, no menciona el uso de tecnologías	NO	Nose enfoca al tema de estudio
40	Scopus	Optimizing demand forecasting for business events tourism: a comparative analysis of cutting-edge models	2025	Purpose: Given the unique nature of business events tourism, this paper evaluates the forecasting performance of various models using search query data (SQD) to forecast convention attendance. Design/methodology/approach: This research uses monthly and quarterly business event attendance data from both the U.S. (Las Vegas) and China (Macau) markets. Using SQD as the input, we evaluated and compar…	Business events tourism; Demand forecasting; Prophet; Search query data; Time-series	SI	Utiliza la IA para pronosticar la demanda turística	SI	Utiliza redes neuronales artificiales
41	Scopus	Dynamic Monitoring Method of Rural Tourism Popularity Based on Big Data Management Technology	2022	Great achievements have been made in the construction of new countryside, and rural tourism is an emerging industry. Rural tourism is an industry developed during the construction of new countryside, which promotes the development of rural economy. More and more people are going to the countryside to experience the life and scenery of the countryside. For managers of rural tourism, the dynamic mo…		SI	Utiliza la IA para identificar la satisfacción de usuarios en relación a el turismo rural	SI	Utiliza red neuronal recurrente de memoria a largo plazo (LSTM) y la red neuronal convolucional (CNN)
42	Scopus	Construction of Instructional Quality Assessment Model of Tourism Management Specialty Based on BPNN Algorithm	2023	With the growth of the times, more and more people now choose tourism management major. The quality assessment of practical teaching of tourism management specialty is a difficult problem in the practical teaching of tourism management specialty in universities, and it is also an important part of the instructional plan of tourism management specialty in universities, and the main way of practica…	Back propagation neural network; Instructional quality assessment; Tourism management	SI	Puede contribuir con las preguntas de investigación	NO	Sen enfoca en la evaluacion de la educación en la gestión del turismo	SI	Necesita una revisión más completa
43	Scopus	A New Decision Support System for Enhancing Tourism Destination Management and Competitiveness	2024	The feedback provided by tourists is a key factor in the success of any tourist destination, as it serves as an indicator of the level of satisfaction with various aspects of their stay. This paper introduces a new decision support system designed to assist stakeholders of tourist destinations in making informed decisions regarding amenities and activities. It focuses on various aspects such as l…	aspect recognition; decision support system; deep learning; sentiment analysis; text classification; tourism destination	SI	Utiliza la IA para identificar la satisfacción de los turistas	SI	Propone el uso de PLN para el análisis de sentimientos para evaluar la satisfacción de los turistas
44	Scopus	When ChatGPT Gives Incorrect Answers: The Impact of Inaccurate Information by Generative AI on Tourism Decision-Making	2025	This study investigates how inaccurate information provided by ChatGPT impacts travelers’ acceptance of recommendations. Six experiments were conducted based on the accessibility-diagnosticity framework. These examined the moderating role of the prominence and type of incorrect information and their effects on decision-making. The results show that participants perceived more accuracy and trustwo…	accessibility-diagnosticity; AI recommendations; chatbot; ChatGPT; generative AI; incorrect information	SI	Analiza como ChatGPT afecta la aceptación de las recomendaciones por parte de los viajeros	SI	Puede contibuir con las preguntas de investigación
45	Scopus	Beyond the storm: Harnessing AI for effective tourism crisis management	2024	This study explores the impact of artificial intelligence (AI) on both smart human resources and crisis management. It also examines how smart human resources influences crisis management and mediates the relationship between AI and crisis management. PLS-SEM and WarpPLS 7.0 statistical software were employed to analyze survey responses from 464 managers and supervisors at travel agencies, hotels…		SI	Propone la inteligencia artificial para la gestión eficaz de las crisis turísticas	SI	Puede contibuir con las preguntas de investigación
46	Scopus	A large-scale decision-making model for the expediency of funding the development of tourism infrastructure in regions	2025	The main goal of this study was to develop a hybrid decision-making support model regarding the feasibility of financing the development of tourism infrastructure of regions for V4 countries, based on the predicted assessment of the level of tourist movement in relation to the infrastructure and accessibility of the studied regions, expert opinions regarding the level of quality of tourist servic…	decision-making; feasibility of funding; hybrid data; neuro-fuzzy networks; predictive analytics; tourist infrastructure	SI	Propone un modelo de apoyo a la toma de decisiones turísticas	SI	Utiliza un modelo neuro-difuso de cinco capas
47	Scopus	Research on the Development of Digital Business Forecasting in the 'Commerce, Culture, and Tourism Plus' Model Based on Big Data and Predictive Models	2023	In the face of the rapid development of digital business, accurate forecasting is of significant importance. This study constructs a business forecasting model based on deep learning to improve prediction accuracy. Data from tourism platform users and orders are collected, and a dataset is constructed through data processing. The study designs a deep neural network model that combines user inform…	Business Forecasting; Deep Learning; Digital Business	SI	Utiliza la IA para simular patrones de ciclos económicos	SI	Propone un modelo de red neuronal profunda
48	Scopus	CYBERSECURITY IN TOURISM AND HOSPITALITY MANAGEMENT RESEARCH: CURRENT ISSUES, TRENDS, AND AN AGENDA FOR FUTURE RESEARCH; [Ciberseguridad en la investigación en turismo y hotelería: temas de actualidad, tendencias y una agenda para futuras investigaciones]	2024	This paper compares two literature reviews on cybersecurity issues focused on the mature organisations, business and management field, and the embryonic tourism and hospitality area. Hence, we use the general study on the former as a benchmark for the narrower review on the latter, to map the current trends and identify the corresponding gaps. Findings suggest the following topic clusters for fut…	cyber education; cyberattack; cybercrime; Cybersecurity	SI	Analiza el aprendizaje automático, inteligencia artificial, blockchain, big data, en la cyber seguridad y turismo	SI	Puede contibuir con las preguntas de investigación
49	Scopus	Deep and organizational learning as innovation catalyzer in digital business ecosystems – a scenario analysis on the tourism destination Berlin	2024	Purpose: The below-average innovative capacity of the tourism sector raises the question on the potentials of digital business ecosystems (DBEs) to overcome these shortages at a destination level – especially within a smart city environment. Using the example of the German Capital Berlin, this article aims to discuss both the possibilities and inhibitors of innovative knowledge-creation by buildi…	Deep learning; Destination Berlin; Digital business eco-systems; Digital platforms; Innovation processes; Organizational learning	SI	Propone la integración de funcionalidades de aprendizaje profundo (DL) en la gestión turística	SI	Puede contibuir con las preguntas de investigación
50	Scopus	Research on Tourism Resources Management Method Based on Deep Learning and Knowledge Graph	2022	In order to improve the efficiency of tourism resources management and the accuracy of tourism resources recommendation, a personalized recommendation method for tourism resources based on deep learning and knowledge graph was proposed. Firstly, the feature vectors of attractions were represented based on the Node2Vec method in knowledge graph feature learning. Then, the potential feature vectors…	feature vector; GRU; knowledge graph; tourism resources	SI	Utiliza la IA para la gestión de los recursos turísticos	SI	Aplica una red neuronal GRU
51	Scopus	The impact of artificial intelligence on the marketing performance of tourism and hospitality businesses: The mediating role of marketing innovation	2024	This study examines the impact of artificial intelligence (AI) on marketing innovation and marketing performance. It also explores how marketing innovation affects marketing performance and investigates the mediating role of marketing innovation in the relationship between AI and marketing performance. To analyze survey responses from 398 employees at travel agencies in Egypt and Saudi Arabia, th…		SI	Analiza el impacto de la inteligencia artificial, en el marketing de empresas de turismo	SI	Propone que la IA puede mejorar los resultados de marketing y el crecimiento sostenido en un mercado competitivo
52	Scopus	Design of Tourism Information Management System Based on Fuzzy Clustering Algorithm	2023	High-pressure and high-efficiency work makes people's leisure style tend to travel more and more. With the rapid growth of modern network technology, people can not only take part in traveling through physical channels such as travel agencies, but also make more choices of travel behaviors depend on the interaction of network information. In order to further improve the efficiency of tourism mana…	Fuzzy clustering algorithm; Information retrieval; Wisdom tourism	SI	Utiliza la IA para la eficiencia de la gestión y el servicio turístico	SI	Propone un algoritmo de agrupamiento difuso
53	Scopus	AI trust divide: How recruiter-candidate roles shape tourism personnel decision-making	2024	The artificial intelligence revolution has prompted tourism organizations to consider whether and how to use AI to improve efficiency and create value, particularly in areas such as personnel selection. Through five experimental studies (N = 2199), this paper first reveals that a trust divide exists between job candidates and recruiters in travel agencies. We then investigate how the consideratio…	Artificial intelligence (AI); Motivated reasoning; Personnel decision-making agent; Quasi-experiment; Scenario-based experiment	SI	Utiliza la IA para reclutar personal para servicios turísticos	SI	Puede contibuir con las preguntas de investigación
54	Scopus	Tourism Management with AI Integration for Mining Heritage: a Literature Review Approach	2024	Integrating Artificial Intelligence (AI) into heritage tourism has opened new avenues for transforming visitors’ engagement with historical sites. This research paper delves into a novel paradigm, focusing on AI integration in inter-and intra-regional mining heritage site planning and design. Recognizing this context's unique challenges and opportunities, the study aims to uncover critical ideas …	Artificial intelligence; Heritage tourism; Mining heritage; Sustainable development; Tourism management	SI	Aplica la IA en la planificación y el diseño de sitios patrimoniales	SI	Puede contibuir con las preguntas de investigación
55	Scopus	Effects of artificial intelligence on tourism business: How European hospitality industry responded	2024	The tourism industry is undergoing a rapid transformation brought on by artificial intelligence (AI), which is offering a wide range of benefits to both businesses and their customers. Nevertheless, this technological advancement also poses a number of difficulties for which the sector will need to find solutions. This chapter investigates the effects that artificial intelligence (AI) has had on …	Artificial intelligence; ChatGPT^European tourism; Hospitality industry; Social media; Tourism	SI	Investiga los efectos que la inteligencia artificial (IA) ha tenido en el sector turístico	SI	Analiza el impacto de la inteligencia artificial, en el sector hotelero
56	Scopus	Tourism Information Management System Using Neural Networks Driven by Particle Swarm Model	2022	Based on the concept of "smart tourism,"this paper designs and implements a tourism management information system based on PSO-optimized NN. The foreground tourism web page of the system adopts DIV + CSS mode for page planning and layout, PHP as the client script language, and SQL server as the database to store and analyze user information. At the same time, the system adds personalized componen…		SI	diseña e implementa un sistema de información de gestión turística basado en IA	SI	Aplica redes neuronales impulsado por un modelo de enjambre de partículas
57	Scopus	Transforming the travel landscape: Smart contracts in tourism management	2024	This chapter explores smart contract integration in tourism, examining its current state, applications, challenges, and future trajectories. Leveraging blockchain, smart contracts enhance transaction security and transparency, addressing fraud concerns. They significantly cut costs and boost efficiency in booking and payment, benefiting travelers and service providers with increased control and t…		SI	Propone el uso de contratos inteligentes en la gestión del turismo	SI	Explora las DAO en el turismo, sugiriendo una toma de decisiones descentralizada
58	Scopus	AI and the future of talent management in tourism and hospitality	2024	This exploratory study investigates artificial intelligence (AI) integration’s potential impact on the future of talent management in tourism and hospitality. Using the scenario planning method and Dator’s Alternative Futures Framework, four 2035 alternative scenarios were constructed. These scenarios served as a foundation for 3 group and 30 individual scenario-planning sessions with internation…	Artificial intelligence; employee outcomes; ethical AI; scenario planning; talent management; tourism and hospitality jobs	SI	Analiza el uso de la IA para la gestión del talento en el turismo y la hospitalidad	SI	Puede contibuir con las preguntas de investigación
59	Scopus	Innovative Integration of Experiential Learning in Hospitality and Tourism Management Education: A Systematic Review	2024	Experiential learning has been described as the most effective approach in tourism and hospitality management education. Various experiential learning methods have been used to enhance students’ learning experience. There are many experiential learning methods which can cater to different subjects. This way of using these experiential learning methods has significant consequences for teaching and…	Experiential learning projects; Field trips; Restaurant; Role-playing; Service-learning; Simulation	NO	Se enfoca en la metodología del aprendizaje experencial, para la edcación en turismo	NO	No menciona el uso de la IA en la gestión turística
60	Scopus	Research on Modeling of Influencing Factors of New Eco-tourism Management Based on Economic Fluctuation Prediction	2024	This paper begins by analyzing the effect of market economic fluctuations on the digital economy's tourism economy. Second, this paper uses a city cluster in the Yangtze River Delta in China as an example, selects the tourism economic data of the region from 2011 to 2021, and forecasts the tourism development potential of the region from 2022 to 2026 using the conventional methods for predicting …	ARIMA; Eco-tourism Management; Economic fluctuation prediction; Influencing factors	SI	Utiliza la IA para la predicción de fluctuaciones en la economía turística	SI	Combina la red neuronal RBF y el método de suavizado exponencial y los compara con GM (1, 1), ARIMA y otros modelos.
61	Scopus	Customized language models for tourism management: Implications and future research	2025	[No abstract available]	Artificial intelligence; Chatgpt; Human-artificial intelligence interaction; Human-computer interaction	SI	Propone modelos de lenguaje personalizados, utilizando IA	SI	propone ChatGPT o Gemini, para las empresas de turismo
62	Scopus	Deep learning mechanism and big data in hospitality and tourism: Developing personalized restaurant recommendation model to customer decision-making	2024	With the increasing ubiquity of booking restaurants through online platforms, the need for restaurant recommender systems that satisfy individual preferences has grown. Previous studies have found it challenging to reflect preferences in multiple aspects because customers' restaurant experiences were approached from a single aspect. This study proposes a novel personalized recommender system that…	Aspect-based sentiment analysis; Online platforms; Recommender system; Restaurant; Restaurant reviews	SI	Propone el aprendizaje profundo para la recomendación de restaurantes	SI	Propone la técnica de análisis de sentimientos basado en aspectos (ABSA)
63	Scopus	Potential of business intelligence and analytics on the performance of tourism and hospitality companies	2024	Nowadays, making the right business decisions is crucial for companies. With the enhancements in connectivity, data accessibility has been expanding rapidly. Information is meaningful, data and business intelligence (BI) turn data into information to support the decisions of persons or companies with the purpose of efficiency and effectiveness increasing. However, selecting the right BI system wh…		SI	Propone un sistema de inteligencia empresarial para el sector turístico	SI	Puede contibuir con las preguntas de investigación
64	Scopus	The use of augmented reality technologies in tourism businesses from the perspective of UTAUT2	2023	Purpose: Augmented reality is one of the technologies that developed and became widespread, especially after the 2000s. It is seen that innovations such as 3D virtual reality glasses, artificial intelligence-supported smart chatbots that communicate with customers in a virtual environment, keyless hotel systems, the Internet of Things, augmented reality applications, smart personal assistants, di…	Application developers; Augmented reality; Digital marketing agencies; Tourism; Tourism businesses	SI	Propone chatbots inteligentes respaldados por inteligencia artificia para servicios hoteleros	SI	Menciona diversas tecnologias utilzadas en el sector turístico
65	Scopus	Data analysis framework of tourism enterprise human resource management system based on MySQL and fuzzy clustering	2023	The essential task of enterprise human resource management is complicated, involving many departments, so the work is difficult. By applying data analysis technology to enterprise human resource management, the way of human resource management can be expanded. The competition among enterprises is mainly the competition of enterprise talents. If the company has top talents in the industry, they ca…	Bee colony optimization algorithm; Data analysis; Database; Fuzzy clustering; Human resource management; Neural network; Tourism enterprises	SI	Utiliza tecnologías emergentes para la gestión de recursos humanos en empresas turísticas	SI	Menciona el uso de redes neuronales
66	Scopus	A New Predictive Algorithm for Time Series Forecasting Based on Machine Learning Techniques: Evidence for Decision Making in Agriculture and Tourism Sectors	2022	Accurate time series prediction techniques are becoming fundamental to modern decision support systems. As massive data processing develops in its practicality, machine learning (ML) techniques applied to time series can automate and improve prediction models. The radical novelty of this paper is the development of a hybrid model that combines a new approach to the classical Kalman filter with ma…	Kalman filter; nonlinear autoregressive neural networks; support vector regression model; time series prediction	SI	Propone el uso de aprendizaje automático (ML) para la toma de desiciones en el sector turístico	SI	Utiliza redes neuronales autorregresivas no lineales (NAR)
67	Scopus	Big Data and Cloud Computing- Integrated Tourism Decision-Making in Smart Logistics Technologies	2023	Since technology allows tourist companies to replace expensive human labor with electronic labor, labor expenses are reduced, yet customer service concerns are often avoided. Companies and organizations face new challenges daily. Increased consumer demands and global competition result in significant adjustments in the industrialized world. On the other hand, technology can bring forth entirely n…	Behaviour; Big Data; Cloud Computing; Decision-Making; E-Business; Mobile Commerce; Smart Logistics; Tourism Management	SI	Propone un modelo de gestión de marketing turístico basado en big data	SI	pronosticar el comportamiento de los consumidores de viajes
68	Scopus	Enhancing Minority Sentiment Classification in Gastronomy Tourism: A Hybrid Sentiment Analysis Framework with Data Augmentation, Feature Engineering and Business Intelligence	2024	The gastronomy tourism industry plays an important role in boosting local economies, enhancing the travel experience, and preserving culinary traditions unique to specific places. In this context, comprehending customer sentiments is of paramount importance for business decision-making, menu choice offerings, marketing strategies, and customer service improvements. Traditional sentiment analysis …	Business analytics; data visualization; machine learning; sentiment analysis; tourism industry	SI	Utiliza la IA, para el analisis de sentimientos en el turismo gastronómico	SI	Utiliza machine learning
69	Scopus	Harnessing appreciative inquiry in tourism planning: towards a strategy for poverty alleviation in marginalised communities	2024	Purpose: This study aims to apply the appreciative inquiry approach (AI) to develop a tourism strategy for poverty alleviation in marginalised communities. The focus is to provide practical insights for leveraging tourism to drive positive socio-economic change for the impoverished, using Rosetta, a port city in Egypt with cultural and historical significance, as a case study. Design/methodology/…	Appreciative-inquiry-approach; Egypt; Policymaking; Poverty-alleviation; SDGs; Small-tourism-cities	NO	No menciona el uso de la Inteligencia artificial	NO	No contribuye con las preguntas de investigación
70	Scopus	Trip Planner: A Big Data Analytics Based Recommendation System for Tourism Planning	2023	Foreign tourism has gained immense popularity in the recent past. To make a rational decision about the destination to be visited one has to go through variety of social media sources with very large number of reviews, which is a tedious task. Automated analysis of these reviews is quite complex as it involves non structured text data having slang terms also. Moreover, these reviews are pouring i…	Big Data Analytics; Deep Learning; International Tourism; Recommendation System; Sentiment Analysis; Sentiment Score	SI	Propone el Big data y el aprendizaje profundo para la recomendación de viajes	SI	Apache Spark y modelos de aprendizaje profundo
71	Scopus	Emotional arousal: how artificial intelligence-generated content influences tourism decision-making	2024	The application of generative artificial intelligence in the tourism industry is deepening and playing a key role in enhancing personalized services. However, there are still significant gaps in specific studies dealing with the subsequent impact on tourists’ actual decisions and their economic significance. Based on prospect theory and social impact theory, this study explores in depth the effec…	Artificial intelligence-generative content; emotional arousal; generative artificial intelligence; goal-framing; prospect theory	SI	Analiza los efectos del contenido generado por inteligencia artificial en las emociones de los turistas	SI	Puede contibuir con las preguntas de investigación
72	Scopus	Leveraging Digital Transformation in Marketing of Home-Stay Businesses to Promote Tourism: in the Hospitality Industry	2024	Recent advancements in digital technology have led to a significant shift in marketing methods within the hotel business. Recognizing the potential for tourism marketing, homestay firms have actively pursued digital transformation. This involves incorporating digital technology to enhance productivity, customer experience, and competitiveness. According to a 2020 Deloitte report, 89% of hospitali…		SI	Propone el uso de la IA, para mejorar el marketing de turismo	SI	Puede contibuir con las preguntas de investigación
73	Scopus	Exploring the influence of artificial intelligence on the management of hospitality and tourism sectors: A bibliometric overview	2024	Artificial intelligence (AI) is transforming the tourism industry, improving data classification and analysis, forecasting systems, customer trends and habits, with both voice and facial recognition. This study conducts a bibliometric analysis using VOSviewer software to understand the state of the art of AI and its application in the hospitality and tourism industry from 1996 to January 2023. Da…	Artificial Intelligence; Hospitality Industry; Research Agenda; Tourism	SI	Analiza la influencia de la inteligencia artificial en la gestión de los sectores de la hostelería y el turismo	SI	Menciona modelos algorítmicos, la robótica para la gestión del turismo sostenible
74	Scopus	Insight Analysis of Tourists' Behavior and Preference by Deep Learning in Tourism Destination Management	2023	With the rapid development of tourism, the application of deep learning technology in tourism destination management has gradually attracted widespread attention. The purpose of this study is to explore the potential value of deep learning in the insight analysis of tourists' behavior and preferences, so as to provide better decision support for tourism destination management. By analyzing the ma…	Deep Learning; Preference; sentiment analysis; Tourism Destination Management; Tourists' Behavior	SI	Utiliza la IA para extraer información clave sobre los comportamientos y las preferencias de los turistas	SI	Tecnología de procesamiento del lenguaje natural y la red neuronal
75	Scopus	Design of Risk Management Decision-making Framework for Tourism Enterprises Based on Artificial Intelligence	2023	As a global industry, tourism not only faces increasingly fierce competition, but also bears the threat of many internal and external risks. In this complex and changeable environment, tourism enterprises urgently need effective risk management decision-making mechanism to ensure business sustainability and profitability. This paper is devoted to designing a risk management decision-making framew…	Artificial Intelligence; Risk Management; Tourism Enterprises	SI	Utiliza la IA para la gestión de riesgos en el marco del turísmo	SI	Propone la (IA) para ayudar a las empresas turísticas a comprender, identificar y abordar mejor varios factores de riesgo
76	Scopus	Effects and potentials of business intelligence tools on tourism companies in a tourism 4.0 environment	2023	Several technologies emerged and disrupted how they operate in the Tourism 4.0 environment surrounding tourism companies. One, the digitalization of processes has become a way to support survival, and second, data grows exponentially daily. In this environment, a business intelligence tool can help to improve decision-making while enabling managers to realize complex information quickly and make …		SI	Analiza los efectos y potencialidades de las herramientas de IA en las empresas turísticas	SI	Propone sistemas de inteligencia empresarial conjugados con inteligencia artificial para las empresas turísticas
77	Scopus	Management and use of artificial intelligence for recovery in the Indian hospitality and tourism industry during COVID-19	2024	The Pandemic (Covid-19) deeply impacted the Hospitality and Tourism industry across the country. Its effect disrupted human lives and pushed the country to an economic slowdown. This Pandemic brought fear of travel and dining out, on every person be it a domestic or an international traveller. Lockdowns and intra state travel ban, and the fear of being quarantined took its toll on Hospitality and…	AI; Automated Machines; COVID 19; Hygiene; ICT; Innovation	SI	Porpone el uso de inteligencia artificial para la recuperación de la industria hotelera	SI	Puede contibuir con las preguntas de investigación
78	Scopus	Route Planning of Health Care Tourism Based on Computer Deep Learning	2022	With the continuous improvement of people's living standards, the form of tourism is gradually changing. In the past two years, people's demand for tourism has also changed from traditional ornamental tourism to wellness tourism, which has provided a development opportunity for rural tourism. At the same time, the government has also begun to focus on the development of tourism with rural charact…		SI	Propone el uso del aprendizaje profundo para la planificación de rutas de turismo	SI	Aprendizaje profundo para rutas de turismo de salud
79	Scopus	Algorithm of Scenic Spot Tourism Route Planning Based on Convolution Neural Network	2022	Based on convolution neural network, a tourism route planning method for scenic spots is proposed. The method of performing primitive trajectory adaptive learning is used to plan and design the tourism route nodes and path space. On this basis, the shortest distribution grid structure model of tourism routes is constructed. Using the visual servo mobile route optimization control method, the cons…		SI	Propone el uso de la IA para la planificación de rutas de turismo	SI	Utiliza red neuronal convolucional (CNN)
80	Scopus	Role of Artificial Intelligence in travel decision making and tourism product selling	2024	In this work, data is collected through a questionnaire evaluating factors, such as informativeness from AI, recommendations via AI, social media, customer purchase behavior, learning new strategies, and online tourism marketing influence. The data underwent analysis using the Statistical Package for Social Sciences (SPSS), which allowed us to perform various analysis methods, such as ANOVA analy…	Artificial intelligence; tourism; tourism industry; tourism product selling; travel; travel decision making	SI	Propone el uso de la IA, para recomendaciones de turismo	NO	[Retracted]	NO	[Retracted]
81	Scopus	Advantages of BP Neural Network in Sports Tourism Management System	2022	In recent years, as they have improved their living standards, people have traveled more and more. The Ministry of Tourism Information Management is responsible for how to manage information graphics better. Players’managers point to the need to use travel information, such as information on how to understand sights in a timely manner, provide timely and effective information, provide information…	BP neural network; Management system; Sports tourism; Tourism management	SI	Propone el uso de la IA, para la gestión de turismo deportivo	SI	Utiliza redes neuronales
82	Scopus	Transforming medical tourism through an integrated business intelligence platform: Data-driven insights and healthcare industry impact	2024	Medical tourism has evolved significantly, leveraging data-driven insights in its core operations. This chapter explores the impact of analytics, AI, and big data on patient care, destination selection, and industry dynamics. Personalized patient care is enhanced through data integration, tailoring services to individual needs, improving overall experiences, and treatment outcomes. This focuses o…		NO	Se enfoca más al áera de la medicina	SI	Menciona el turismo médico y el uso de la IA en el mismo	SI	Necesita una revisión más completa
83	Scopus	Sustainable planning of developing tourism destinations after COVID-19 outbreak: a deep learning approach	2024	Tourist destinations across the globe have been hit by the worst of the crisis that ensued the Covid-19 pandemic, and this concern is exponentially worse in developing countries. Sustainable planning of these countries to face the unheralded crises demands an approach to provide the most efficient solutions using past experiences, unique characteristics of the present crisis, and existing obstacl…	covid-19 pandemic; Deep learning; developing tourism destination; sustainable planning; tourism planning and management	SI	Utiliza la IA para la planificación sostenible del desarrollo turístico	SI	Desarrollo un modelo de red neuronal profunda (DNN)
84	Scopus	Spatial layout optimization model integrating layered attention mechanism in the development of smart tourism management	2024	Tourism demand projection is paramount for both corporate operations and destination management, facilitating tourists in crafting bespoke, multifaceted itineraries and enriching their vacation experiences. This study proposes a multilayer self attention mechanism recommendation algorithm based on dynamic spatial perception, with the aim of refining the analysis of tourists’ emotional inclination…	Dynamic spatial perception; Multi scenic itineraries; Multi-layer attention mechanism; Spatial layout; Tourism demand forecasting	SI	Utiliza la IA para la proyección de la demanda turística	SI	Propone un algoritmo de recomendación de mecanismo de autoatención multicapa basado en la percepción espacial dinámica
85	Scopus	Strategic entrepreneurship and digital transformation to enhance the tourism performance management	2024	This chapter delves into the enhancement of the tourism industry through strategic entrepreneurship (SE) and digital transformation. The potential of these methodologies in revolutionizing tourism development and management is emphasized. The Fourth Industrial Revolution, characterized by technologies such as the Internet of Things, big data, artificial intelligence (AI), cloud computing, augment…	Digital transformation; Fourth Industrial Revolution; Strategic entrepreneurship; Tourism management; Tourism per-formance	SI	Menciona diversas tecnologías aplicadas a la actividad turística	SI	Puede contibuir con las preguntas de investigación
86	Scopus	Intelligent entertainment robots based on path navigation planning in tourism intelligent services and user entertainment experience analysis	2025	With the development of tourism industry, users have higher and higher demand for travel experience, while traditional tourism services can no longer meet the needs of users. Therefore, as an innovative tourism service mode, intelligent entertainment robots have broad application prospects. This paper proposes a design scheme of intelligent entertainment robot based on path navigation planning. B…	Intelligent entertainment robot; Path navigation planning; Tourism intelligent service; User entertainment experience	SI	Propone el uso de robots de entretenimiento inteligentes para servicios turísticos	SI	Menciona tecnología de reconocimiento de emociones para percibir y analizar el estado emocional del usuario
87	Scopus	Insights from sentiment analysis to leverage local tourism business in restaurants	2022	Purpose: Social media has become the main venue for users to express their opinions and feelings, generating a vast number of available and valuable data to be scrutinized by researchers and marketers. This paper aims to extend previous studies analyzing social media reviews through text mining and sentiment analysis to provide useful recommendations for management in the restaurant industry. Des…	Giethoorn; Lexalytics; Online reviews; Restaurant business; Sentiment classification; Social media; Text mining	SI	Analiza los sentimientos y emociones de usuarios en el sector del turismo	SI	menciona Lexalytics, una herramienta de inteligencia artificial
88	Scopus	How Artificial Intelligence Optimizes Customer Relationship Management in the Tourism Industry	2024	This study focuses on the application of artificial intelligence technology in the field of customer relationship management in the tourism industry and the problems encountered in this application. At the same time, it will propose corresponding solutions and analyze the many challenges currently faced by artificial intelligence technology, covering Data privacy and security issues, the accuracy…	artificial intelligence; big data analysis; blockchain technology; customer relationship management; tourism industry	SI	Propone la IA para optimizar la atención al cliente Gestión de relaciones en la industria del turismo	SI	Puede contibuir con las preguntas de investigación
[truncated: 90 more rows]

## Sheet: Recovered
		Title	Year	Recuperado
1	Scopus	Embracing the future of interactive marketing with contactless technology: evidence from tourism businesses	2024	SI
[truncated: 155 more rows]

## Sheet: Riesgo de sesgo
	Estudios	Año	Tipo de estudio	Generación aleatoria de la secuencia	Puntaje	Justificación	Ocultación de la asignación	Puntaje	Justificación	Cegamiento de los participantes y del personal	Puntaje	Justificación	Cegamiento de la evaluación de resultados	Puntaje	Justificación	Datos de resultados incompletos	Puntaje	Justificación	Notificación selectiva de los resultados	Puntaje	Justificación	Promedio
[truncated: 148 more rows]

[truncated: 9 more sheets: Total studies by phases, Responses, Country , RQ1, RQ2, RQ3, RQ4, Rb Criteria, Do not touch]
